# Supplementary material for: Studies on Pd-catalyzed asymmetric hydroesterification of enimides. A possible approach to optically active β-amino acid derivatives
Source: Royal Society of Chemistry journal article supplement (doi:10.1039/d2nj01027e), 2022-01-01

# Studies on Asymmetric Hydroesterification of Enimides. A Possible Approach to Optically Active $\beta$ -Amino Acid Derivatives

Junhua Li, Yan Yang, Zichu Wang, and Yian Shi\*

*Institute of Natural and Synthetic Organic Chemistry, Changzhou  
University, Changzhou 213164, P. R. China.*

*Email: [shiyian@cczu.edu.cn](mailto:shiyian@cczu.edu.cn)*

## Supporting Information

### Table of Contents

|                                                      |      |
|------------------------------------------------------|------|
| General Methods                                      | S-2  |
| Experimental procedures and characterization data    | S-2  |
| X-Ray structure of compound <b>2b</b>                | S-12 |
| HPLC data for determination of enantiomeric excesses | S-49 |
| NMR spectra                                          | S-56 |

**General Methods.** All commercially available reagents were used without further purification unless otherwise noted. All dry solvents were purified with solvent purification system before use. Column chromatography was performed on silica gel (300-400 mesh).  $^1\text{H}$  NMR spectra were recorded on a 400 MHz NMR spectrometer,  $^{13}\text{C}$  NMR spectra were recorded on a 100 MHz NMR spectrometer, and  $^{31}\text{P}$  NMR spectra were recorded on a 162 MHz NMR spectrometer. IR spectra were recorded on a FT-IR spectrometer. Melting points were uncorrected. Phenyl formate was prepared according to the reported procedures.<sup>1</sup> Enimide **1a-1j** were synthesized according to the literature procedures.<sup>2</sup> Ligand **L15** was prepared as described in Scheme S1.

- 1) (a) Y. Katafuchi, T. Fujihara, T. Iwai, J. Terao, and Y. Tsuji, *Adv. Synth. Catal.*, **2011**, 353, 475–482; (b) T. Ueda, H. Konishi, and K. Manabe, *Org. Lett.*, **2012**, 14, 3100–3103.
- 2) (a) V. I. Timokhin, N. R. Anastasi, and S. S. Stahl, *J. Am. Chem. Soc.*, **2003**, 125, 12996-12997; (b) J. L. Brice, J. E. Harang, V. I. Timokhin, N. R. Anastasi, and S. S. Stahl, *J. Am. Chem. Soc.*, **2005**, 127, 2868-2869.

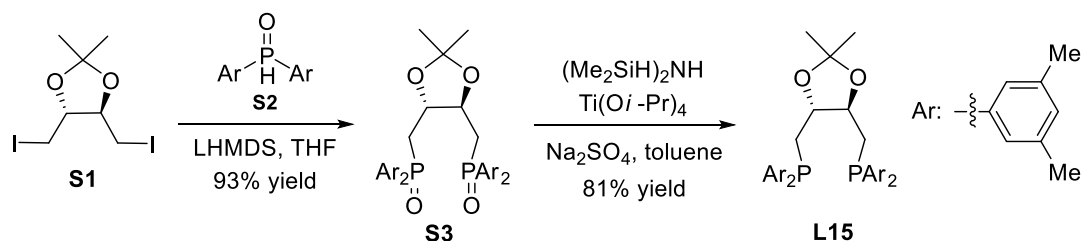

**Scheme S1. Synthesis of L15**

**Procedure for phosphine oxide S2.** To a solution of diethyl phosphite (1.38 g, 10.0 mmol) in THF (10 mL) at 0 °C under Ar atmosphere, was added dropwise 3,5-dimethylphenylmagnesium bromide (0.5 M in THF) (50.0 mL, 25.0 mmol). Upon stirring at 0 °C for 10 min and at rt for 16 h, the reaction mixture was quenched by slow addition of sat. aqueous  $\text{NH}_4\text{Cl}$  solution at 0 °C, extracted with ether, washed with brine, dried over  $\text{Na}_2\text{SO}_4$ , filtered, concentrated under reduced pressure, and purified by column chromatography (silica gel, eluent: petroleum ether:ethyl acetate = 1:1) to give phosphine oxide **S2** as a white solid (2.09 g, 81% yield).<sup>1</sup> IR (film) 1600, 1275, 1192,

1128, 954, 691, 589  $\text{cm}^{-1}$ ;  $^1\text{H}$  NMR (400 MHz,  $\text{CDCl}_3$ )  $\delta$  7.93 (d,  $J = 477.6$  Hz, 1H), 7.29 (dd,  $J = 14.0$  Hz, 4H), 7.17 (s, 2H), 2.33 (s, 12H);  $^{13}\text{C}$  NMR (100 MHz,  $\text{CDCl}_3$ )  $\delta$  138.8 (d,  $J = 13.4$  Hz), 134.4 (d,  $J = 3.0$  Hz), 131.4 (d,  $J = 100$  Hz), 128.3 (d,  $J = 11.5$  Hz), 21.4;  $^{31}\text{P}$  NMR (162 MHz,  $\text{CDCl}_3$ )  $\delta$  22.8.

1) M. Jin and M. Nakamura, *Chem. Lett.*, 2013, **42**, 1035-1037.

**Procedure for phosphine oxide S3:** To a solution of phosphine oxide **S2** (2.84 g, 11.0 mmol) and 4,5-bis(iodomethyl)-2,2-dimethyl-1,3-dioxolane **S1**<sup>1</sup> (1.91 g, 5.0 mmol) in THF (20 mL) at 0 °C under Ar atmosphere, was added dropwise LHMDS (1.0 M THF solution) (11.0 mL, 11.0 mmol). Upon stirring at 0 °C for 18 h, the reaction mixture was quenched with sat. aqueous  $\text{NH}_4\text{Cl}$ , extracted with ethyl acetate ( $3 \times 40$  mL), washed with brine, dried over anhydrous  $\text{Na}_2\text{SO}_4$ , filtered, concentrated under reduced pressure, and purified by column chromatography (silica gel, eluent:  $\text{CH}_2\text{Cl}_2:\text{MeOH} = 30:1$ ) to give phosphine oxide **S3** as a white solid (2.99 g, 93% yield).<sup>2</sup>  $[\alpha]_{\text{D}}^{25} = +22.8$  ( $c$  1.0,  $\text{CHCl}_3$ ); IR (film) 1599, 1377, 1181, 1127, 852, 695  $\text{cm}^{-1}$ ;  $^1\text{H}$  NMR (400 MHz,  $\text{CDCl}_3$ )  $\delta$  7.37 (d,  $J = 12.0$  Hz, 8H), 7.08 (d,  $J = 2.0$  Hz, 4H), 4.13-4.09 (m, 2H), 2.62-2.52 (m, 4H), 2.30 (s, 24H), 1.21 (s, 6H);  $^{13}\text{C}$  NMR (100 MHz,  $\text{CDCl}_3$ )  $\delta$  138.4 (d,  $J = 12.5$  Hz), 138.1 (d,  $J = 12.4$  Hz), 133.559 (d,  $J = 46.1$  Hz), 133.558 (d,  $J = 2.9$  Hz), 133.4 (d,  $J = 2.9$  Hz), 132.6 (d,  $J = 46.2$  Hz), 128.8 (d,  $J = 9.5$  Hz), 128.4 (d,  $J = 9.4$  Hz), 109.4, 76.7 (dd,  $J = 11.2, 3.2$  Hz), 33.4 (d,  $J = 70.4$  Hz), 27.0, 21.4;  $^{31}\text{P}$  NMR (162 MHz,  $\text{CDCl}_3$ )  $\delta$  29.8;

1) For preparation of **S1**, see: S. P. Khanapure, N. Najafi, S. Manna, J.-J. Yang, and J. Rokach, *J. Org. Chem.*, **1995**, *60*, 7548-7551.

2) Y. Ohmaru, N. Sato, M. Mizutani, S. Kotani, M. Sugiura, and M. Nakajima, *Org. Biomol. Chem.*, 2012, **10**, 4562-4570.

**Procedure for ligand L15:** To a mixture of phosphine oxide **S3** (2.99 g, 4.65 mmol) and anhydrous  $\text{Na}_2\text{SO}_4$  (0.299 g) in dry toluene (15 mL) at rt under Ar atmosphere, were added dropwise  $(\text{Me}_2\text{SiH})_2\text{NH}$  (1.55 g, 11.6 mmol) and  $\text{Ti}(\text{O}i\text{-Pr})_4$  (1.322 g, 4.65 mmol) successively.<sup>1</sup> Upon stirring at 60 °C for 24 h, the reaction mixture was cooled to rt, filtered, washed with cold pentane, concentrated under reduced pressure, and purified by column chromatography (silica gel, eluent: petroleum ether:ethyl acetate = 20:1) to give

ligand **L15** as a viscous liquid (2.30 g, 81% yield).<sup>2</sup>  $[\alpha]_D^{25} = -4.5$  ( $c$  1.0,  $\text{CHCl}_3$ ); IR (film) 1598, 1259, 1091, 1038, 843, 801, 691  $\text{cm}^{-1}$ ;  $^1\text{H}$  NMR (400 MHz,  $\text{CDCl}_3$ )  $\delta$  7.08 (d,  $J = 7.6$  Hz, 4H), 7.04 (d,  $J = 7.6$  Hz, 4H), 6.95 (s, 2H), 6.93 (s, 2H), 3.87-3.80 (m, 2H), 2.43-2.20 (m, 4H), 2.27 (s, 24H), 1.38 (s, 6H);  $^{13}\text{C}$  NMR (100 MHz,  $\text{CDCl}_3$ )  $\delta$  138.5 (d,  $J = 12.2$  Hz), 138.1 (d,  $J = 12.3$  Hz), 138.0 (d,  $J = 7.4$  Hz), 137.9 (d,  $J = 7.1$  Hz), 131.0, 130.84, 130.75, 130.52, 130.47, 130.34, 108.9, 80.0 (dd,  $J = 14.3, 7.2$  Hz), 32.4 (dd,  $J = 15.2, 3.3$  Hz), 27.5, 21.5;  $^{31}\text{P}$  NMR (162 MHz,  $\text{CDCl}_3$ )  $\delta$  -23.8; HRMS (ESI)  $m/z$  ( $\text{M}+\text{H}$ )<sup>+</sup> Calcd for  $\text{C}_{39}\text{H}_{49}\text{O}_2\text{P}_2$  611.3202; found 611.3207.

1) C. Petit, A. Favre-Reguillon, B. Albela, L. Bonneviot, G. Mignani, and M. Lemaire, *Organometallics*, **2009**, 28, 6379–6382.

2) P. Koschker, M. Kähny, and B. Breit, *J. Am. Chem. Soc.*, **2015**, 137, 3131-3137.

### Representative procedure for asymmetric hydroesterification (Table 3, 2a).

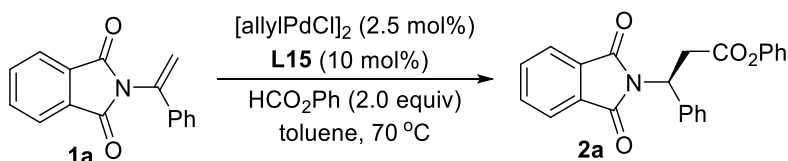

To a mixture of  $(\eta^3\text{-C}_3\text{H}_5)_2\text{Pd}_2\text{Cl}_2$  (0.0018 g, 0.0050 mmol), **L15** (0.0122 g, 0.020 mmol), and enamide **1a** (0.0499 g, 0.20 mmol) in toluene (0.1 mL), was added  $\text{HCO}_2\text{Ph}$  (0.0488 g, 0.40 mmol) via syringe. The vial was purged with Ar to remove the air and tightly sealed with a septum cap. Upon stirring at 70 °C for 60 h, the reaction mixture was cooled to rt, and purified by flash chromatography (silica gel, eluent: petroleum ether:ethyl acetate = 8:1) to give amino ester **2a** as a white solid (0.0728 g, 98% yield, 83:17 er) (**Racemate synthesis**: Enimide **1** and amino ester **2** were found to be inseparable by chromatography. To have complete conversions, racemates of amino esters **2** were prepared with 10 mol% racemic DIOP [by combining 50% (+)-DIOP and 50% (-)-DIOP] at 90 °C for 72 h).

### Procedure for gram scale asymmetric hydroesterification reaction (Scheme 3).

To a mixture of  $(\eta^3\text{-C}_3\text{H}_5)_2\text{Pd}_2\text{Cl}_2$  (0.0274 g, 0.075 mmol), **L15** (0.1832 g, 0.30 mmol),

and enamide **1a** (0.7478 g, 3.0 mmol) in toluene (1.5 mL), was added HCO<sub>2</sub>Ph (0.7327 g, 6.0 mmol) via syringe. The vial was purged with Ar to remove the air and tightly sealed with a septum cap. Upon stirring at 70 °C for 60 h, the reaction mixture was cooled to rt, and purified by flash chromatography (silica gel, eluent: petroleum ether:ethyl acetate = 8:1) to give amino ester **2a** as a white solid (1.066 g, 96% yield, 83:17 er).

**Recrystallization:** A portion of the amino ester (0.8722 g) was completely dissolved in a mixture of ethyl acetate (25 mL) and petroleum ether (30 mL) at 65 °C. The resulting solution was cooled to room temperature and the solvent was allowed to evaporate slowly for 4 days. The mixture was filtered to give a white solid (0.3679 g, 42% yield, 63:37 er). The mother liquid was concentrated under reduced pressure to give a white solid (0.4983 g, 57% yield, 97.5:2.5 er), which was dissolved again in a mixture of ethyl acetate (10 mL) and petroleum ether (20 mL) at 65 °C. The resulting solution was placed at room temperature for 3 days, allowing slow evaporation of the solvent. The mixture was filtered to give a white solid (0.136 g, 16% yield, 92:8 er). The mother liquid was concentrated under reduced pressure to give a white solid (0.3598 g, 41% yield, 99:1 er).

**Table 3, 2a**

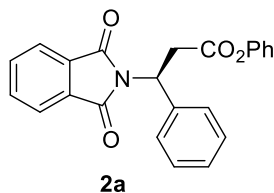

White solid; mp. 120.5-122.4 °C;  $[\alpha]_D^{25} = -11.6$  (*c* 1.0, CHCl<sub>3</sub>) (83:17 er); IR (film) 1757, 1711, 1387, 1195, 720 cm<sup>-1</sup>; <sup>1</sup>H NMR (400 MHz, CDCl<sub>3</sub>) δ 7.83-7.79 (m, 2H), 7.70-7.66 (m, 2H), 7.61 (d, *J* = 7.2 Hz, 2H), 7.40-7.30 (m, 5H), 7.18 (t, *J* = 7.2 Hz, 1H), 6.97 (d, *J* = 7.6 Hz, 2H), 5.96 (dd, *J* = 10.0, 5.6 Hz, 1H), 4.06 (dd, *J* = 16.8, 10.4 Hz, 1H), 3.54 (dd, *J* = 16.8, 6.0 Hz, 1H); <sup>13</sup>C NMR (100 MHz, CDCl<sub>3</sub>) δ 169.4, 168.3, 150.5, 138.4, 134.3, 131.9, 129.6, 129.0, 128.6, 128.1, 126.1, 123.6, 121.6, 51.1, 36.3; HRMS (ESI) *m/z* (M+Na)<sup>+</sup> Calcd for C<sub>23</sub>H<sub>17</sub>NO<sub>4</sub>Na 394.1050; found 394.1050.

**Table 3, 2b**

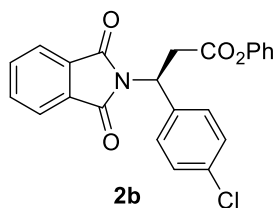

(X-ray structure)

White solid; mp. 138.3-140.0 °C;  $[\alpha]_D^{25} = -11.0$  (*c* 1.0, CHCl<sub>3</sub>) (82:18 er); IR (film) 1758, 1711, 1492, 1386, 1195, 717 cm<sup>-1</sup>; <sup>1</sup>H NMR (400 MHz, CDCl<sub>3</sub>) δ 7.86-7.75 (m, 2H), 7.75-7.66 (m, 2H), 7.55 (d, *J* = 8.4 Hz, 2H), 7.37-7.28 (m, 4H), 7.19 (t, *J* = 7.2 Hz, 1H), 6.97 (d, *J* = 7.6 Hz, 2H), 5.92 (dd, *J* = 10.0, 6.4 Hz, 1H), 3.98 (dd, *J* = 16.4, 9.6 Hz, 1H), 3.54 (dd, *J* = 16.4, 6.0 Hz, 1H); <sup>13</sup>C NMR (100 MHz, CDCl<sub>3</sub>) δ 169.1, 168.1, 150.4, 136.9, 134.5, 134.4, 131.8, 129.61, 129.56, 129.2, 126.2, 123.7, 121.5, 50.35, 36.2; HRMS (ESI) *m/z*: (M+Na)<sup>+</sup> Calcd for C<sub>23</sub>H<sub>16</sub>ClNO<sub>4</sub>Na 428.0660; found 428.0660.

**Table 3, 2c**

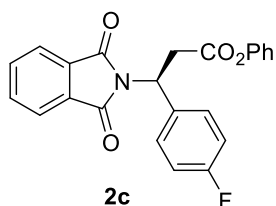

White solid; mp. 111.4-113.4 °C;  $[\alpha]_D^{25} = -15.8$  (*c* 1.0, CHCl<sub>3</sub>) (83:17 er); IR (film) 1757, 1710, 1387, 1162, 717 cm<sup>-1</sup>; <sup>1</sup>H NMR (400 MHz, CDCl<sub>3</sub>) δ 7.85-7.75 (m, 2H), 7.72-7.66 (m, 2H), 7.64-7.57 (m, 2H), 7.32 (t, *J* = 7.6 Hz, 2H), 7.18 (t, *J* = 7.2 Hz, 1H), 7.05 (t, *J* = 8.8 Hz, 2H), 6.96 (d, *J* = 7.6 Hz, 2H), 5.93 (dd, *J* = 9.6, 6.0 Hz, 1H), 3.99 (dd, *J* = 16.8, 10.0 Hz, 1H), 3.54 (dd, *J* = 16.4, 6.0 Hz, 1H); <sup>13</sup>C NMR (100 MHz, CDCl<sub>3</sub>) δ 169.2, 168.2, 162.7 (d, *J* = 245.9 Hz), 150.4, 134.34, 134.31 (d, *J* = 5.2 Hz), 131.8, 130.0 (d, *J* = 8.2 Hz), 129.6, 126.2, 123.6, 121.5, 115.9 (d, *J* = 21.3 Hz), 50.4, 36.4; HRMS (ESI) *m/z*: (M+Na)<sup>+</sup> Calcd for C<sub>23</sub>H<sub>16</sub>FNO<sub>4</sub>Na 412.0956; found 412.0955.

**Table 3, 2d**

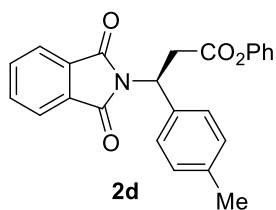

White solid; mp. 87.9-89.6 °C;  $[\alpha]_D^{25} = -11.8$  (*c* 1.0, CHCl<sub>3</sub>) (83:17 er); IR (film) 1758, 1712, 1369, 1195, 717 cm<sup>-1</sup>; <sup>1</sup>H NMR (400 MHz, CDCl<sub>3</sub>) δ 7.84-7.78 (m, 2H), 7.70-7.65 (m, 2H), 7.50 (d, *J* = 8.0 Hz, 2H), 7.32 (t, *J* = 7.6 Hz, 2H), 7.21-7.15 (m, 3H), 6.98 (d, *J* = 8.0 Hz, 2H), 5.94 (dd, *J* = 10.0, 6.0 Hz, 1H), 4.04 (dd, *J* = 16.4, 10.0 Hz, 1H), 3.53 (dd, *J* = 16.4, 5.6 Hz, 1H), 2.34 (s, 3H); <sup>13</sup>C NMR (100 MHz, CDCl<sub>3</sub>) δ 169.4, 168.2, 150.5, 138.3, 135.5, 134.2, 131.9, 129.6, 129.5, 128.0, 126.1, 123.5, 121.6, 50.8, 36.3, 21.3; HRMS (ESI) *m/z*: (M+Na)<sup>+</sup> calcd for C<sub>24</sub>H<sub>19</sub>NO<sub>4</sub>Na 408.1206; found 408.1208.

**Table 3, 2e**

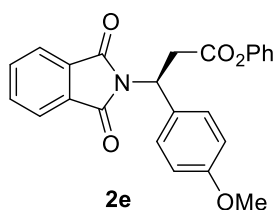

White solid; mp. 112.4-114.5 °C;  $[\alpha]_D^{25} = -16.8$  (*c* 1.0, CHCl<sub>3</sub>) (82:18 er); IR (film) 1757, 1710, 1387, 1194, 717 cm<sup>-1</sup>; <sup>1</sup>H NMR (400 MHz, CDCl<sub>3</sub>) δ 7.83-7.78 (m, 2H), 7.70-7.65 (m, 2H), 7.55 (d, *J* = 8.8 Hz, 2H), 7.31 (t, *J* = 7.6 Hz, 2H), 7.18 (t, *J* = 7.2 Hz, 1H), 6.96 (d, *J* = 7.6 Hz, 2H), 6.89 (d, *J* = 8.8 Hz, 2H), 5.91 (dd, t, *J* = 10.0, 6.0 Hz, 1H), 4.01 (dd, *J* = 16.4, 10.0 Hz, 1H), 3.79 (s, 3H), 3.52 (dd, *J* = 16.4, 6.0 Hz, 1H); <sup>13</sup>C NMR (100 MHz, CDCl<sub>3</sub>) δ 169.4, 168.3, 159.6, 150.5, 134.2, 132.0, 130.6, 129.6, 129.5, 126.1, 123.5, 121.6, 114.3, 55.5, 50.5, 36.5; HRMS (ESI) *m/z*: (M+Na)<sup>+</sup> Calcd for C<sub>24</sub>H<sub>19</sub>NO<sub>5</sub>Na 424.1155; found 424.1154.

**Table 3, 2f**

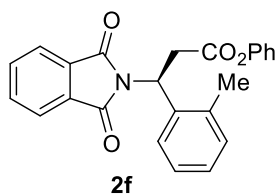

White solid; mp. 80.0-81.6 °C;  $[\alpha]_D^{25} = -2.8$  (*c* 1.0, CHCl<sub>3</sub>) (82:18 er); IR (film) 1755, 1711, 1353, 1193, 717 cm<sup>-1</sup>; <sup>1</sup>H NMR (400 MHz, CDCl<sub>3</sub>) δ 7.87 (d, *J* = 7.6 Hz, 1H), 7.84-7.76 (m, 2H), 7.72-7.65 (m, 2H), 7.35-7.15 (m, 6H), 6.96 (d, *J* = 7.6 Hz, 2H), 6.16 (dd, *J* = 10.0, 6.4 Hz, 1H), 3.98 (dd, *J* = 16.4, 9.6 Hz, 1H), 3.49 (dd, *J* = 16.4, 6.0 Hz, 1H), 2.55 (s, 3H); <sup>13</sup>C NMR (100 MHz, CDCl<sub>3</sub>) δ 169.5, 168.5, 150.5, 136.7, 136.5, 134.3, 131.9, 131.0, 129.6, 128.5, 128.3, 126.6, 126.1, 123.5, 121.6, 47.8, 36.9, 19.9; HRMS (ESI) *m/z*: (M+Na)<sup>+</sup> Calcd for C<sub>24</sub>H<sub>19</sub>NO<sub>4</sub>Na 408.1206; found 408.1206.

**Table 3, 2g**

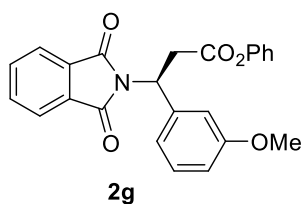

White solid; mp. 85.5-87.3 °C;  $[\alpha]_D^{25} = -8.3$  (*c* 1.0, CHCl<sub>3</sub>) (82:18 er); IR (film) 1756, 1708, 1363, 1193, 722 cm<sup>-1</sup>; <sup>1</sup>H NMR (400 MHz, CDCl<sub>3</sub>) δ 7.83-7.78 (m, 2H), 7.70-7.64 (m, 2H), 7.35-7.26 (m, 3H), 7.21-7.15 (m, 3H), 7.01-6.96 (m, 2H), 6.86 (dd, *J* = 8.0, 1.6 Hz, 1H), 5.93 (dd, *J* = 10.0, 5.6 Hz, 1H), 4.06 (dd, *J* = 16.4, 10.4 Hz, 1H), 3.81 (s, 3H), 3.53 (dd, *J* = 16.8, 6.0 Hz, 1H); <sup>13</sup>C NMR (100 MHz, CDCl<sub>3</sub>) δ 169.4, 168.2, 160.0, 150.5, 139.9, 134.2, 131.9, 130.0, 129.5, 126.1, 123.5, 121.5, 120.2, 113.9, 113.7, 55.4, 51.0, 36.2; HRMS (ESI) *m/z*: (M+Na)<sup>+</sup> Calcd for C<sub>24</sub>H<sub>19</sub>NO<sub>5</sub>Na 424.1155; found 424.1154.

**Table 3, 2h**

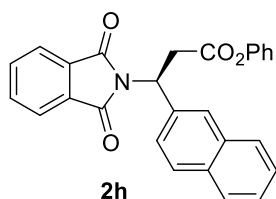

White solid; mp. 92.5-94.5 °C;  $[\alpha]_D^{25} = -8.7$  (*c* 1.0, CHCl<sub>3</sub>) (81:19 er); IR (film) 1756,



1710, 1382, 1193, 721  $\text{cm}^{-1}$ ;  $^1\text{H}$  NMR (400 MHz,  $\text{CDCl}_3$ )  $\delta$  8.06 (s, 1H), 7.90-7.80 (m, 5H), 7.73 (dd,  $J = 8.4, 1.2$  Hz, 1H), 7.71-7.65 (m, 2H), 7.52-7.45 (m, 2H), 7.31 (t,  $J = 8.0$  Hz, 2H), 7.18 (t,  $J = 7.6$  Hz, 1H), 6.99 (d,  $J = 8.4$  Hz, 2H), 6.13 (dd,  $J = 10.0, 5.6$  Hz, 1H), 4.16 (dd,  $J = 16.4, 10.0$  Hz, 1H), 3.66 (dd,  $J = 16.8, 6.0$  Hz, 1H);  $^{13}\text{C}$  NMR (100 MHz,  $\text{CDCl}_3$ )  $\delta$  169.4, 168.3, 150.5, 135.8, 134.3, 133.4, 133.2, 131.9, 129.6, 128.9, 128.4, 127.8, 127.2, 126.63, 126.60, 126.1, 125.7, 123.6, 121.6, 51.2, 36.3; HRMS (ESI)  $m/z$ :  $(\text{M}+\text{Na})^+$  Calcd for  $\text{C}_{27}\text{H}_{19}\text{NO}_4\text{Na}$  444.1206; found 444.1207.

**Table 3, 2i**

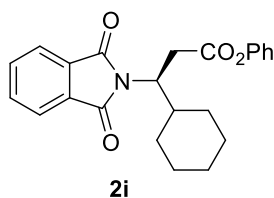

White solid; mp. 126.9-128.2  $^{\circ}\text{C}$ ;  $[\alpha]_{\text{D}}^{25} = -19.9$  ( $c$  1.0,  $\text{CHCl}_3$ ) (76:24 er); IR (film) 1758, 1710, 1371, 1192, 721  $\text{cm}^{-1}$ ;  $^1\text{H}$  NMR (400 MHz,  $\text{CDCl}_3$ )  $\delta$  7.85-7.79 (m, 2H), 7.71-7.65 (m, 2H), 7.28 (t,  $J = 8.0$  Hz, 2H), 7.15 (t,  $J = 7.6$  Hz, 1H), 6.95 (d,  $J = 7.6$  Hz, 2H), 4.49 (td,  $J = 10.8, 4.0$  Hz, 1H), 3.47 (dd,  $J = 15.6, 11.2$  Hz, 1H), 3.10 (dd,  $J = 16.0, 4.0$  Hz, 1H), 2.20-2.05 (m, 1H), 1.94 (d,  $J = 12.4$  Hz, 1H), 1.81 (d,  $J = 13.2$  Hz, 1H), 1.75-1.55 (m, 3H), 1.37-0.90 (m, 5H);  $^{13}\text{C}$  NMR (100 MHz,  $\text{CDCl}_3$ )  $\delta$  170.1, 168.6, 150.5, 134.1, 131.8, 129.5, 126.0, 123.4, 121.5, 53.3, 39.5, 34.7, 30.7, 29.9, 26.1, 25.9, 25.8; HRMS (ESI)  $m/z$ :  $(\text{M}+\text{Na})^+$  Calcd for  $\text{C}_{23}\text{H}_{23}\text{NO}_4\text{Na}$  400.1519; found 400.1519.

**Table 3, 2j**

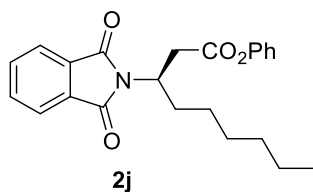

Colorless oil;  $[\alpha]_{\text{D}}^{25} = -11.0$  ( $c$  1.0,  $\text{CHCl}_3$ ) (72:28 er); IR (film) 1758, 1710, 1371, 1193, 720  $\text{cm}^{-1}$ ;  $^1\text{H}$  NMR (400 MHz,  $\text{CDCl}_3$ )  $\delta$  7.85-7.80 (m, 2H), 7.73-7.67 (m, 2H), 7.31 (t,  $J = 7.6$  Hz, 2H), 7.17 (t,  $J = 7.2$  Hz, 1H), 6.99 (d,  $J = 8.0$  Hz, 2H), 4.84-4.73 (m, 1H), 3.44 (dd,  $J = 16.0, 10.0$  Hz, 1H), 3.03 (dd,  $J = 16.0, 5.2$  Hz, 1H), 2.25-2.10 (m, 1H),

1.87-1.77 (m, 1H), 1.40-1.20 (m, 8H), 0.85 (t,  $J = 6.4$  Hz, 3H);  $^{13}\text{C}$  NMR (100 MHz,  $\text{CDCl}_3$ )  $\delta$  169.7, 168.5, 150.5, 134.2, 131.9, 129.5, 126.0, 123.5, 121.6, 48.3, 37.3, 32.6, 31.8, 28.9, 26.5, 22.7, 14.2; HRMS (ESI)  $m/z$ :  $(\text{M}+\text{Na})^+$  Calcd for  $\text{C}_{23}\text{H}_{25}\text{NO}_4\text{Na}$  402.1676; found 402.1674.

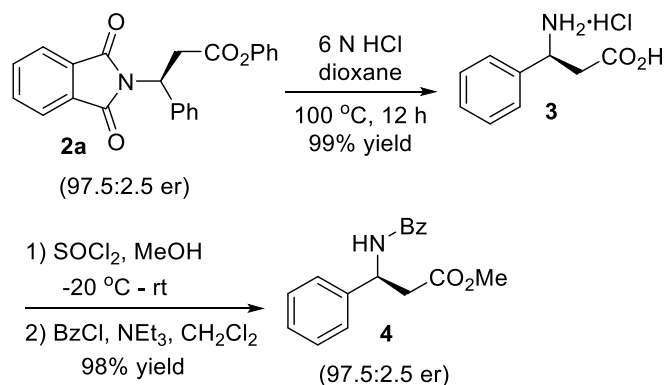

**Scheme 4** The synthesis and derivatization of  $\beta$ -amino acid.

**Procedure for amino acid 3.** A solution of amino ester **2a** (0.1857 g, 0.50 mmol) in 6 N HCl (15 mL) and dioxane (1.0 mL) was stirred at 100 °C for 12 h.<sup>1</sup> The reaction mixture was cooled to rt and washed with ether (3x5.0 mL). The aqueous phase was concentrated to give amino acid hydrochloride **3** as a white solid (0.1008 g, 99% yield). mp. 178.3-180.2 °C;  $[\alpha]_{\text{D}}^{25} = +2.0$  ( $c$  1.0,  $\text{H}_2\text{O}$ ) [lit.<sup>2</sup>  $[\alpha]_{\text{D}}^{25} = +2.8$  ( $c$  0.28,  $\text{H}_2\text{O}$ ) for 97.5:2.5 er, for *S*-configuration];  $^1\text{H}$  NMR (400 MHz,  $\text{D}_2\text{O}$ )  $\delta$  7.49-7.41 (m, 5H), 4.75 (t,  $J = 7.2$  Hz, 1H), 3.16 (dd,  $J = 17.2, 8.0$  Hz, 1H), 3.06 (dd,  $J = 17.2, 6.8$  Hz, 1H);  $^{13}\text{C}$  NMR (100 MHz,  $\text{D}_2\text{O}$ )  $\delta$  173.5, 135.1, 129.6, 129.3, 126.9, 51.4, 37.7.

**Procedure for amino ester 4.** <sup>1a</sup>To a solution of amino acid hydrochloride **3** (0.0403 g, 0.20 mmol) in MeOH (1.0 mL) at -20 °C, was added  $\text{SOCl}_2$  (0.436 g, 3.6 mmol) dropwise. The reaction mixture was warmed to rt, stirred overnight, and concentrated. The resulting residue was dissolved in  $\text{CH}_2\text{Cl}_2$  (2.0 mL), followed by the successive addition of  $\text{NEt}_3$  (0.060 g, 0.60 mmol) and  $\text{BzCl}$  (0.042 g, 0.30 mmol). Upon stirring at rt for 30 min, the reaction mixture was concentrated and purified by flash chromatography (silica gel, petroleum ether:EtOAc = 5:1 to 3:1) to afford *N*-benzoyl amino ester **4** (0.0555 g, 98% yield, 97.5:2.5 er). mp. 114.8-116.7 °C;  $[\alpha]_{\text{D}}^{25} = +16.9$  ( $c$  1.0,  $\text{CHCl}_3$ ) (97.5:2.5

er), [litt.<sup>3</sup>  $[\alpha]_D^{20} = -20.6$  (c 0.85, CHCl<sub>3</sub>) for *R*-configuration]; IR (film) 3348, 1732, 1635 cm<sup>-1</sup>; <sup>1</sup>H NMR (400 MHz, CDCl<sub>3</sub>) δ 7.81 (d, *J* = 7.2 Hz, 2H), 7.66-7.56 (m, 1H), 7.53-7.46 (m, 1H), 7.44-7.36 (m, 2H), 7.36-7.27 (m, 4H), 7.27-7.21 (m, 1H), 5.65-5.30 (m, 1H), 3.61 (s, 3H), 3.02 (dd, *J* = 15.6, 5.6 Hz, 1H), 2.92 (dd, *J* = 15.6, 5.6 Hz, 1H); <sup>13</sup>C NMR (100 MHz, CDCl<sub>3</sub>) δ 172.2, 166.8, 140.7, 134.3, 131.8, 128.9, 128.7, 127.8, 127.2, 126.4, 52.1, 50.0, 39.8;

- 1) (a) X. Xiao, M. Liu, C. Rong, F. Xue, S. Li, Y. Xie and Y. Shi, *Org. Lett.*, 2012, **20**, 5270-5273; (b) C.-H. Lee, J.-S. Lee, H.-K. Na, D.-W. Yoon, H. Miyaji, W.-S. Cho and J. L. Sessler, *J. Org. Chem.*, 2005, **70**, 2067-2074.
- 2) (a) E. Forró, T. Paál, G. Tasnádi and F. Fülöp, *Adv. Synth. Catal.*, 2006, **348**, 917-923; (b) J. Lai, S. Sayalero, A. Ferrali, L. Osorio-Planes, F. Bravo, C. Rodriguez-Escrich and M. A. Pericàs, *Adv. Synth. Catal.*, 2018, **360**, 2914-2924.
- 3) P. Gizecki, R. Dhal, L. Toupet and G. Dujardin, *Org. Lett.*, 2000, **2**, 585-588.

## The X-ray structure of compound **2b**

Compound **2b** (0.10 g, >99:1 er) was dissolved in ethyl acetate (2 mL) and petroleum ether (6 mL). The solvent was allowed to slowly evaporate at rt to get a colorless crystal suitable for X-ray diffraction analysis. The intensity data were collected on a D8 VENTURE instrument. The data were outlined below.

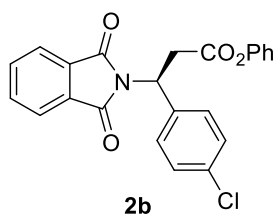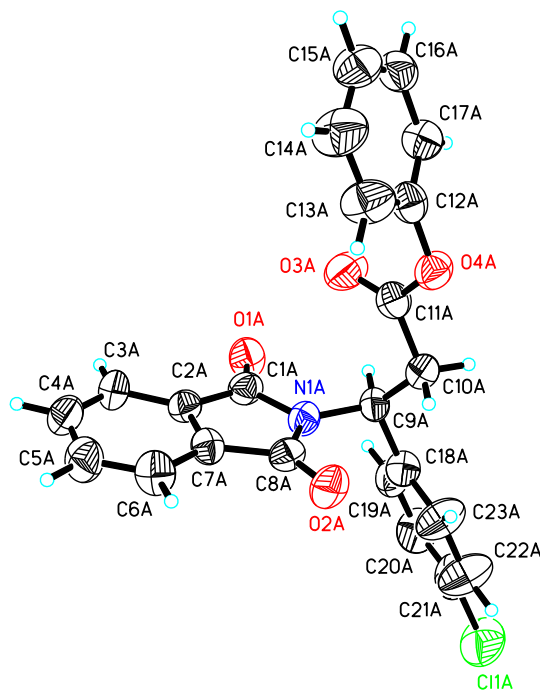

**Figure S-1.** Ortep diagram of compound **2b** (the thermal ellipsoids are drawn at the 30% probability level).

Table S1. Crystal data and structure refinement for **2b**.

|                                   |                                                     |                 |
|-----------------------------------|-----------------------------------------------------|-----------------|
| Identification code               | <b>2b</b>                                           |                 |
| Empirical formula                 | C <sub>23</sub> H <sub>16</sub> Cl N O <sub>4</sub> |                 |
| Formula weight                    | 405.82                                              |                 |
| Temperature                       | 293(2) K                                            |                 |
| Wavelength                        | 0.71073 Å                                           |                 |
| Crystal system                    | Triclinic                                           |                 |
| Space group                       | P 1                                                 |                 |
| Unit cell dimensions              | a = 10.606(3) Å                                     | α = 65.747(7)°. |
|                                   | b = 14.275(4) Å                                     | β = 88.159(7)°. |
|                                   | c = 15.503(5) Å                                     | γ = 71.091(7)°. |
| Volume                            | 2010.6(10) Å <sup>3</sup>                           |                 |
| Z                                 | 4                                                   |                 |
| Density (calculated)              | 1.341 Mg/m <sup>3</sup>                             |                 |
| Absorption coefficient            | 0.219 mm <sup>-1</sup>                              |                 |
| F(000)                            | 840                                                 |                 |
| Crystal size                      | 0.170 x 0.140 x 0.110 mm <sup>3</sup>               |                 |
| Theta range for data collection   | 2.044 to 25.499°.                                   |                 |
| Index ranges                      | -12 ≤ h ≤ 12, -17 ≤ k ≤ 16, -16 ≤ l ≤ 18            |                 |
| Reflections collected             | 23840                                               |                 |
| Independent reflections           | 11905 [R(int) = 0.0480]                             |                 |
| Completeness to theta = 25.242°   | 99.7 %                                              |                 |
| Absorption correction             | Semi-empirical from equivalents                     |                 |
| Max. and min. transmission        | 0.7456 and 0.6010                                   |                 |
| Refinement method                 | Full-matrix least-squares on F <sup>2</sup>         |                 |
| Data / restraints / parameters    | 11905 / 118 / 1103                                  |                 |
| Goodness-of-fit on F <sup>2</sup> | 1.008                                               |                 |
| Final R indices [I > 2σ(I)]       | R1 = 0.0722, wR2 = 0.1841                           |                 |
| R indices (all data)              | R1 = 0.1436, wR2 = 0.2434                           |                 |
| Absolute structure parameter      | 0.06(5)                                             |                 |
| Extinction coefficient            | 0.016(3)                                            |                 |
| Largest diff. peak and hole       | 0.285 and -0.230 e.Å <sup>-3</sup>                  |                 |

Table S2. Atomic coordinates ( $\times 10^4$ ) and equivalent isotropic displacement parameters ( $\text{\AA}^2 \times 10^3$ ) for **2b**.  $U(\text{eq})$  is defined as one third of the trace of the orthogonalized  $U^{ij}$  tensor.

|        | x         | y         | z        | U(eq)  |
|--------|-----------|-----------|----------|--------|
| Cl(1)  | 6160(4)   | 5861(3)   | 11844(3) | 134(1) |
| Cl(1A) | 7259(5)   | 6712(4)   | 7241(3)  | 162(2) |
| Cl(1B) | 5702(3)   | 7134(3)   | 3614(2)  | 116(1) |
| Cl(1C) | 4157(7)   | 6168(4)   | -1873(3) | 190(2) |
| N(1)   | 8673(9)   | 9479(7)   | 8783(6)  | 85(2)  |
| N(1A)  | 9693(7)   | 8808(6)   | 3123(5)  | 70(2)  |
| N(1B)  | 3096(6)   | 3766(6)   | 6932(5)  | 65(2)  |
| N(1C)  | 2481(9)   | 4331(8)   | 2600(7)  | 96(3)  |
| O(1)   | 8103(9)   | 10822(8)  | 9298(8)  | 132(3) |
| O(2)   | 9900(8)   | 8148(9)   | 8302(7)  | 121(3) |
| O(3)   | 7536(9)   | 11258(8)  | 6966(6)  | 110(2) |
| O(4)   | 7356(9)   | 10476(8)  | 6028(7)  | 113(3) |
| O(1A)  | 11900(7)  | 8542(6)   | 3522(6)  | 96(2)  |
| O(2A)  | 7812(7)   | 8818(6)   | 2428(5)  | 93(2)  |
| O(3A)  | 9891(8)   | 10998(6)  | 2249(6)  | 125(3) |
| O(4A)  | 7799(7)   | 12121(6)  | 1664(5)  | 88(2)  |
| O(1B)  | 4044(10)  | 2601(8)   | 6246(7)  | 122(3) |
| O(2B)  | 1545(7)   | 4832(8)   | 7529(7)  | 108(3) |
| O(3B)  | 4636(7)   | 1486(7)   | 8617(5)  | 94(2)  |
| O(4B)  | 4705(7)   | 2537(5)   | 9335(5)  | 86(2)  |
| O(1C)  | 394(10)   | 4457(10)  | 2075(8)  | 142(4) |
| O(2C)  | 4151(8)   | 4454(9)   | 3419(7)  | 140(4) |
| C(1)   | 8961(12)  | 10178(11) | 9103(10) | 97(3)  |
| C(2)   | 10399(11) | 9978(11)  | 9080(9)  | 99(4)  |
| C(3)   | 11180(13) | 10422(12) | 9331(11) | 123(5) |
| C(4)   | 12483(18) | 10061(15) | 9286(13) | 139(5) |
| C(5)   | 13068(15) | 9194(18)  | 9065(12) | 141(6) |
| C(6)   | 12252(12) | 8745(13)  | 8763(9)  | 113(4) |
| C(7)   | 10937(11) | 9151(11)  | 8777(8)  | 91(3)  |
| C(8)   | 9819(10)  | 8824(11)  | 8599(8)  | 87(3)  |
| C(9)   | 7324(10)  | 9501(9)   | 8606(8)  | 90(3)  |
| C(10)  | 7013(11)  | 9624(11)  | 7625(8)  | 102(4) |
| C(11)  | 7335(12)  | 10545(12) | 6812(11) | 98(4)  |

|        |           |           |           |        |
|--------|-----------|-----------|-----------|--------|
| C(12)  | 7717(14)  | 11257(11) | 5290(10)  | 98(4)  |
| C(13)  | 6821(12)  | 12209(10) | 4696(9)   | 94(3)  |
| C(14)  | 7240(16)  | 12922(12) | 3927(11)  | 113(4) |
| C(15)  | 8510(20)  | 12709(19) | 3782(13)  | 138(6) |
| C(16)  | 9429(17)  | 11707(19) | 4399(17)  | 139(6) |
| C(17)  | 9041(15)  | 10978(13) | 5153(13)  | 119(4) |
| C(18)  | 7014(9)   | 8557(9)   | 9415(8)   | 80(3)  |
| C(19)  | 6372(12)  | 8735(11)  | 10136(10) | 97(3)  |
| C(20)  | 6142(12)  | 7890(13)  | 10875(9)  | 102(4) |
| C(21)  | 6526(11)  | 6874(10)  | 10905(9)  | 93(3)  |
| C(22)  | 7090(19)  | 6718(12)  | 10185(13) | 147(6) |
| C(23)  | 7398(17)  | 7524(12)  | 9461(12)  | 136(6) |
| C(1A)  | 11070(10) | 8473(8)   | 3060(8)   | 75(3)  |
| C(2A)  | 11241(9)  | 8014(8)   | 2355(7)   | 71(2)  |
| C(3A)  | 12412(10) | 7544(9)   | 2033(8)   | 84(3)  |
| C(4A)  | 12246(13) | 7178(10)  | 1374(9)   | 99(3)  |
| C(5A)  | 10988(15) | 7218(11)  | 1046(8)   | 103(4) |
| C(6A)  | 9915(12)  | 7685(10)  | 1357(8)   | 94(3)  |
| C(7A)  | 10017(10) | 8081(8)   | 2043(7)   | 70(2)  |
| C(8A)  | 8987(10)  | 8610(8)   | 2514(6)   | 69(2)  |
| C(9A)  | 9120(9)   | 9430(7)   | 3687(7)   | 71(2)  |
| C(10A) | 8106(10)  | 10514(8)  | 3068(8)   | 84(3)  |
| C(11A) | 8716(12)  | 11207(9)  | 2270(9)   | 90(3)  |
| C(12A) | 8234(10)  | 12802(9)  | 867(8)    | 82(3)  |
| C(13A) | 8115(14)  | 12721(12) | 42(10)    | 120(4) |
| C(14A) | 8556(17)  | 13362(14) | -748(10)  | 133(5) |
| C(15A) | 9095(13)  | 14090(11) | -690(9)   | 106(4) |
| C(16A) | 9234(10)  | 14150(9)  | 142(10)   | 98(3)  |
| C(17A) | 8834(11)  | 13473(9)  | 960(8)    | 89(3)  |
| C(18A) | 8610(10)  | 8742(9)   | 4561(7)   | 78(3)  |
| C(19A) | 9443(11)  | 8138(10)  | 5417(9)   | 97(3)  |
| C(20A) | 9036(16)  | 7507(12)  | 6258(10)  | 118(4) |
| C(21A) | 7800(17)  | 7489(11)  | 6219(9)   | 115(4) |
| C(22A) | 6967(15)  | 8035(15)  | 5416(11)  | 139(6) |
| C(23A) | 7373(13)  | 8673(12)  | 4579(9)   | 118(4) |
| C(1B)  | 3090(12)  | 3074(11)  | 6514(8)   | 87(3)  |
| C(2B)  | 1656(13)  | 3107(12)  | 6482(9)   | 103(4) |
| C(3B)  | 1110(20)  | 2560(20)  | 6115(13)  | 190(9) |

|        |          |           |           |         |
|--------|----------|-----------|-----------|---------|
| C(4B)  | -370(30) | 2830(30)  | 6208(18)  | 248(16) |
| C(5B)  | -990(20) | 3460(30)  | 6613(14)  | 227(16) |
| C(6B)  | -410(15) | 3972(18)  | 6906(10)  | 153(7)  |
| C(7B)  | 965(12)  | 3756(13)  | 6859(9)   | 103(4)  |
| C(8B)  | 1813(10) | 4221(10)  | 7152(8)   | 84(3)   |
| C(9B)  | 4244(9)  | 4030(8)   | 7140(7)   | 73(3)   |
| C(10B) | 5379(9)  | 2998(8)   | 7786(8)   | 84(3)   |
| C(11B) | 4893(9)  | 2266(10)  | 8586(8)   | 76(3)   |
| C(12B) | 4221(10) | 1890(9)   | 10117(8)  | 80(3)   |
| C(13B) | 5076(11) | 1005(9)   | 10854(8)  | 83(3)   |
| C(14B) | 4558(14) | 380(10)   | 11585(9)  | 97(3)   |
| C(15B) | 3215(14) | 615(11)   | 11614(9)  | 96(3)   |
| C(16B) | 2372(12) | 1530(12)  | 10868(10) | 102(4)  |
| C(17B) | 2845(11) | 2169(9)   | 10132(9)  | 88(3)   |
| C(18B) | 4636(8)  | 4772(8)   | 6265(7)   | 63(2)   |
| C(19B) | 4069(12) | 5874(10)  | 5938(8)   | 94(3)   |
| C(20B) | 4381(11) | 6613(9)   | 5108(9)   | 95(3)   |
| C(21B) | 5292(10) | 6195(10)  | 4618(7)   | 79(3)   |
| C(22B) | 5833(11) | 5101(11)  | 4886(9)   | 95(3)   |
| C(23B) | 5478(11) | 4397(10)  | 5705(9)   | 89(3)   |
| C(1C)  | 1081(13) | 4575(11)  | 2591(10)  | 103(4)  |
| C(2C)  | 671(10)  | 5058(9)   | 3288(8)   | 81(3)   |
| C(3C)  | -525(13) | 5460(12)  | 3543(11)  | 114(4)  |
| C(4C)  | -566(16) | 5886(11)  | 4200(10)  | 108(4)  |
| C(5C)  | 551(16)  | 5897(9)   | 4597(9)   | 102(4)  |
| C(6C)  | 1778(13) | 5486(9)   | 4315(8)   | 94(3)   |
| C(7C)  | 1838(10) | 5056(9)   | 3683(7)   | 77(3)   |
| C(8C)  | 2991(13) | 4588(11)  | 3271(9)   | 97(3)   |
| C(9C)  | 3470(13) | 3714(11)  | 2173(9)   | 108(4)  |
| C(10C) | 3200(20) | 2683(11)  | 2320(10)  | 153(6)  |
| O(3C)  | 2850(30) | 1390(30)  | 3706(18)  | 184(6)  |
| O(4C)  | 4970(30) | 1270(20)  | 3720(20)  | 227(9)  |
| C(11C) | 3720(30) | 1800(30)  | 3340(20)  | 193(7)  |
| C(12C) | 3730(30) | 382(19)   | 4603(14)  | 168(6)  |
| C(13C) | 2890(30) | -180(20)  | 4569(13)  | 159(6)  |
| C(14C) | 2720(30) | -990(20)  | 5400(18)  | 154(6)  |
| C(15C) | 3390(30) | -1244(18) | 6265(13)  | 148(6)  |
| C(16C) | 4230(20) | -690(20)  | 6300(14)  | 158(6)  |



|        |          |           |          |        |
|--------|----------|-----------|----------|--------|
| C(17C) | 4400(20) | 130(20)   | 5469(19) | 164(6) |
| O(3')  | 2040(20) | 2400(14)  | 3735(14) | 144(6) |
| O(4')  | 3801(18) | 1060(13)  | 3712(13) | 97(3)  |
| C(11') | 2960(20) | 2040(18)  | 3339(16) | 103(4) |
| C(12') | 3385(19) | 541(13)   | 4632(10) | 98(3)  |
| C(13') | 3040(20) | -379(15)  | 4825(11) | 97(4)  |
| C(14') | 3000(20) | -1073(13) | 5761(13) | 103(4) |
| C(15') | 3301(18) | -847(13)  | 6504(10) | 108(4) |
| C(16') | 3648(17) | 73(15)    | 6311(11) | 103(4) |
| C(17') | 3689(17) | 767(12)   | 5375(12) | 99(4)  |
| C(18C) | 3523(13) | 4351(9)   | 1140(8)  | 89(3)  |
| C(19C) | 2471(16) | 4906(15)  | 468(12)  | 140(5) |
| C(20C) | 2740(20) | 5482(13)  | -535(9)  | 136(5) |
| C(21C) | 3950(20) | 5440(15)  | -687(13) | 127(5) |
| C(22C) | 5020(20) | 4921(16)  | -13(16)  | 160(7) |
| C(23C) | 4738(14) | 4331(13)  | 909(11)  | 136(6) |

---

Table S3. Bond lengths [Å] and angles [°] for **2b**.

---

|               |           |
|---------------|-----------|
| Cl(1)-C(21)   | 1.720(13) |
| Cl(1A)-C(21A) | 1.725(13) |
| Cl(1B)-C(21B) | 1.740(11) |
| Cl(1C)-C(21C) | 1.749(17) |
| N(1)-C(8)     | 1.376(14) |
| N(1)-C(1)     | 1.395(14) |
| N(1)-C(9)     | 1.453(12) |
| N(1A)-C(8A)   | 1.390(12) |
| N(1A)-C(1A)   | 1.396(12) |
| N(1A)-C(9A)   | 1.475(11) |
| N(1B)-C(1B)   | 1.386(14) |
| N(1B)-C(8B)   | 1.403(13) |
| N(1B)-C(9B)   | 1.467(12) |
| N(1C)-C(8C)   | 1.409(14) |
| N(1C)-C(1C)   | 1.410(14) |
| N(1C)-C(9C)   | 1.466(14) |
| O(1)-C(1)     | 1.197(13) |
| O(2)-C(8)     | 1.208(13) |
| O(3)-C(11)    | 1.217(15) |
| O(4)-C(11)    | 1.259(15) |
| O(4)-C(12)    | 1.378(15) |
| O(1A)-C(1A)   | 1.205(11) |
| O(2A)-C(8A)   | 1.182(10) |
| O(3A)-C(11A)  | 1.187(12) |
| O(4A)-C(11A)  | 1.327(12) |
| O(4A)-C(12A)  | 1.397(12) |
| O(1B)-C(1B)   | 1.189(12) |
| O(2B)-C(8B)   | 1.197(13) |
| O(3B)-C(11B)  | 1.212(13) |
| O(4B)-C(11B)  | 1.357(13) |
| O(4B)-C(12B)  | 1.390(12) |
| O(1C)-C(1C)   | 1.195(14) |
| O(2C)-C(8C)   | 1.197(13) |
| C(1)-C(2)     | 1.460(16) |
| C(2)-C(3)     | 1.344(17) |
| C(2)-C(7)     | 1.394(17) |

|              |           |
|--------------|-----------|
| C(3)-C(4)    | 1.32(2)   |
| C(3)-H(3)    | 0.9300    |
| C(4)-C(5)    | 1.37(2)   |
| C(4)-H(4)    | 0.9300    |
| C(5)-C(6)    | 1.42(2)   |
| C(5)-H(5)    | 0.9300    |
| C(6)-C(7)    | 1.329(16) |
| C(6)-H(6)    | 0.9300    |
| C(7)-C(8)    | 1.478(16) |
| C(9)-C(10)   | 1.493(15) |
| C(9)-C(18)   | 1.540(14) |
| C(9)-H(9)    | 0.9800    |
| C(10)-C(11)  | 1.529(17) |
| C(10)-H(10A) | 0.9700    |
| C(10)-H(10B) | 0.9700    |
| C(12)-C(13)  | 1.338(16) |
| C(12)-C(17)  | 1.366(18) |
| C(13)-C(14)  | 1.384(18) |
| C(13)-H(13)  | 0.9300    |
| C(14)-C(15)  | 1.31(2)   |
| C(14)-H(14)  | 0.9300    |
| C(15)-C(16)  | 1.40(2)   |
| C(15)-H(15)  | 0.9300    |
| C(16)-C(17)  | 1.37(2)   |
| C(16)-H(16)  | 0.9300    |
| C(17)-H(17)  | 0.9300    |
| C(18)-C(19)  | 1.359(15) |
| C(18)-C(23)  | 1.368(17) |
| C(19)-C(20)  | 1.365(17) |
| C(19)-H(19)  | 0.9300    |
| C(20)-C(21)  | 1.355(17) |
| C(20)-H(20)  | 0.9300    |
| C(21)-C(22)  | 1.315(17) |
| C(22)-C(23)  | 1.359(18) |
| C(22)-H(22)  | 0.9300    |
| C(23)-H(23)  | 0.9300    |
| C(1A)-C(2A)  | 1.467(14) |
| C(2A)-C(7A)  | 1.360(13) |

|               |           |
|---------------|-----------|
| C(2A)-C(3A)   | 1.392(13) |
| C(3A)-C(4A)   | 1.364(17) |
| C(3A)-H(3A)   | 0.9300    |
| C(4A)-C(5A)   | 1.419(17) |
| C(4A)-H(4A)   | 0.9300    |
| C(5A)-C(6A)   | 1.308(16) |
| C(5A)-H(5A)   | 0.9300    |
| C(6A)-C(7A)   | 1.416(15) |
| C(6A)-H(6A)   | 0.9300    |
| C(7A)-C(8A)   | 1.471(13) |
| C(9A)-C(10A)  | 1.495(13) |
| C(9A)-C(18A)  | 1.516(14) |
| C(9A)-H(9A)   | 0.9800    |
| C(10A)-C(11A) | 1.511(14) |
| C(10A)-H(10C) | 0.9700    |
| C(10A)-H(10D) | 0.9700    |
| C(12A)-C(13A) | 1.345(15) |
| C(12A)-C(17A) | 1.363(14) |
| C(13A)-C(14A) | 1.369(18) |
| C(13A)-H(13A) | 0.9300    |
| C(14A)-C(15A) | 1.370(19) |
| C(14A)-H(14A) | 0.9300    |
| C(15A)-C(16A) | 1.344(17) |
| C(15A)-H(15A) | 0.9300    |
| C(16A)-C(17A) | 1.396(15) |
| C(16A)-H(16A) | 0.9300    |
| C(17A)-H(17A) | 0.9300    |
| C(18A)-C(23A) | 1.346(16) |
| C(18A)-C(19A) | 1.388(16) |
| C(19A)-C(20A) | 1.395(17) |
| C(19A)-H(19A) | 0.9300    |
| C(20A)-C(21A) | 1.324(18) |
| C(20A)-H(20A) | 0.9300    |
| C(21A)-C(22A) | 1.328(19) |
| C(22A)-C(23A) | 1.395(18) |
| C(22A)-H(22A) | 0.9300    |
| C(23A)-H(23A) | 0.9300    |
| C(1B)-C(2B)   | 1.508(16) |

|               |           |
|---------------|-----------|
| C(2B)-C(7B)   | 1.309(17) |
| C(2B)-C(3B)   | 1.400(19) |
| C(3B)-C(4B)   | 1.51(3)   |
| C(3B)-H(3B)   | 0.9300    |
| C(4B)-C(5B)   | 1.30(4)   |
| C(4B)-H(4B)   | 0.9300    |
| C(5B)-C(6B)   | 1.31(3)   |
| C(5B)-H(5B)   | 0.9300    |
| C(6B)-C(7B)   | 1.395(18) |
| C(6B)-H(6B)   | 0.9300    |
| C(7B)-C(8B)   | 1.456(17) |
| C(9B)-C(18B)  | 1.484(13) |
| C(9B)-C(10B)  | 1.529(13) |
| C(9B)-H(9B)   | 0.9800    |
| C(10B)-C(11B) | 1.463(15) |
| C(10B)-H(10E) | 0.9700    |
| C(10B)-H(10F) | 0.9700    |
| C(12B)-C(13B) | 1.365(15) |
| C(12B)-C(17B) | 1.385(14) |
| C(13B)-C(14B) | 1.352(15) |
| C(13B)-H(13B) | 0.9300    |
| C(14B)-C(15B) | 1.357(17) |
| C(14B)-H(14B) | 0.9300    |
| C(15B)-C(16B) | 1.382(17) |
| C(15B)-H(15B) | 0.9300    |
| C(16B)-C(17B) | 1.339(16) |
| C(16B)-H(16B) | 0.9300    |
| C(17B)-H(17B) | 0.9300    |
| C(18B)-C(19B) | 1.358(14) |
| C(18B)-C(23B) | 1.364(13) |
| C(19B)-C(20B) | 1.401(16) |
| C(19B)-H(19B) | 0.9300    |
| C(20B)-C(21B) | 1.348(15) |
| C(20B)-H(20B) | 0.9300    |
| C(21B)-C(22B) | 1.357(15) |
| C(22B)-C(23B) | 1.388(15) |
| C(22B)-H(22B) | 0.9300    |
| C(23B)-H(23B) | 0.9300    |

|               |           |
|---------------|-----------|
| C(1C)-C(2C)   | 1.489(16) |
| C(2C)-C(3C)   | 1.333(15) |
| C(2C)-C(7C)   | 1.397(14) |
| C(3C)-C(4C)   | 1.377(18) |
| C(3C)-H(3C)   | 0.9300    |
| C(4C)-C(5C)   | 1.360(18) |
| C(4C)-H(4C)   | 0.9300    |
| C(5C)-C(6C)   | 1.381(17) |
| C(5C)-H(5C)   | 0.9300    |
| C(6C)-C(7C)   | 1.344(15) |
| C(6C)-H(6C)   | 0.9300    |
| C(7C)-C(8C)   | 1.457(15) |
| C(9C)-C(18C)  | 1.492(16) |
| C(9C)-C(10C)  | 1.512(18) |
| C(9C)-H(9C)   | 0.9800    |
| C(10C)-C(11') | 1.53(2)   |
| C(10C)-C(11C) | 1.54(2)   |
| C(10C)-H(10G) | 0.9567    |
| C(10C)-H(10H) | 0.9564    |
| C(10C)-H(10X) | 0.9607    |
| C(10C)-H(10Y) | 0.9611    |
| O(3C)-C(11C)  | 1.25(2)   |
| O(3C)-C(12C)  | 1.57(3)   |
| O(4C)-C(11C)  | 1.31(2)   |
| C(12C)-C(13C) | 1.3900    |
| C(12C)-C(17C) | 1.3900    |
| C(13C)-C(14C) | 1.3900    |
| C(13C)-H(13C) | 0.9300    |
| C(14C)-C(15C) | 1.3900    |
| C(14C)-H(14C) | 0.9300    |
| C(15C)-C(16C) | 1.3900    |
| C(15C)-H(15C) | 0.9300    |
| C(16C)-C(17C) | 1.3900    |
| C(16C)-H(16C) | 0.9300    |
| C(17C)-H(17C) | 0.9300    |
| O(3')-C(11')  | 1.225(19) |
| O(4')-C(11')  | 1.28(2)   |
| O(4')-C(12')  | 1.44(2)   |

|                     |           |
|---------------------|-----------|
| C(12')-C(13')       | 1.3900    |
| C(12')-C(17')       | 1.3900    |
| C(13')-C(14')       | 1.3900    |
| C(13')-H(13')       | 0.9300    |
| C(14')-C(15')       | 1.3900    |
| C(14')-H(14')       | 0.9300    |
| C(15')-C(16')       | 1.3900    |
| C(15')-H(15')       | 0.9300    |
| C(16')-C(17')       | 1.3900    |
| C(16')-H(16')       | 0.9300    |
| C(17')-H(17')       | 0.9300    |
| C(18C)-C(23C)       | 1.321(17) |
| C(18C)-C(19C)       | 1.335(18) |
| C(19C)-C(20C)       | 1.50(2)   |
| C(19C)-H(19C)       | 0.9300    |
| C(20C)-C(21C)       | 1.28(2)   |
| C(20C)-H(20C)       | 0.9300    |
| C(21C)-C(22C)       | 1.35(2)   |
| C(22C)-C(23C)       | 1.41(2)   |
| C(22C)-H(22C)       | 0.9300    |
| C(23C)-H(23C)       | 0.9300    |
|                     |           |
| C(8)-N(1)-C(1)      | 111.1(10) |
| C(8)-N(1)-C(9)      | 124.7(10) |
| C(1)-N(1)-C(9)      | 124.0(9)  |
| C(8A)-N(1A)-C(1A)   | 112.1(8)  |
| C(8A)-N(1A)-C(9A)   | 126.8(8)  |
| C(1A)-N(1A)-C(9A)   | 120.6(8)  |
| C(1B)-N(1B)-C(8B)   | 111.2(8)  |
| C(1B)-N(1B)-C(9B)   | 127.4(8)  |
| C(8B)-N(1B)-C(9B)   | 121.4(8)  |
| C(8C)-N(1C)-C(1C)   | 110.9(9)  |
| C(8C)-N(1C)-C(9C)   | 116.6(9)  |
| C(1C)-N(1C)-C(9C)   | 131.5(10) |
| C(11)-O(4)-C(12)    | 115.8(11) |
| C(11A)-O(4A)-C(12A) | 117.5(8)  |
| C(11B)-O(4B)-C(12B) | 117.5(8)  |
| O(1)-C(1)-N(1)      | 122.0(10) |

|                     |           |
|---------------------|-----------|
| O(1)-C(1)-C(2)      | 131.4(12) |
| N(1)-C(1)-C(2)      | 106.5(11) |
| C(3)-C(2)-C(7)      | 121.4(12) |
| C(3)-C(2)-C(1)      | 130.3(14) |
| C(7)-C(2)-C(1)      | 108.2(10) |
| C(4)-C(3)-C(2)      | 118.7(15) |
| C(4)-C(3)-H(3)      | 120.6     |
| C(2)-C(3)-H(3)      | 120.7     |
| C(3)-C(4)-C(5)      | 121.8(15) |
| C(3)-C(4)-H(4)      | 119.1     |
| C(5)-C(4)-H(4)      | 119.1     |
| C(4)-C(5)-C(6)      | 119.7(14) |
| C(4)-C(5)-H(5)      | 120.1     |
| C(6)-C(5)-H(5)      | 120.1     |
| C(7)-C(6)-C(5)      | 117.1(15) |
| C(7)-C(6)-H(6)      | 121.4     |
| C(5)-C(6)-H(6)      | 121.4     |
| C(6)-C(7)-C(2)      | 120.8(12) |
| C(6)-C(7)-C(8)      | 131.8(13) |
| C(2)-C(7)-C(8)      | 107.1(10) |
| O(2)-C(8)-N(1)      | 127.1(10) |
| O(2)-C(8)-C(7)      | 125.9(11) |
| N(1)-C(8)-C(7)      | 106.9(11) |
| N(1)-C(9)-C(10)     | 112.9(9)  |
| N(1)-C(9)-C(18)     | 111.4(8)  |
| C(10)-C(9)-C(18)    | 115.1(9)  |
| N(1)-C(9)-H(9)      | 105.5     |
| C(10)-C(9)-H(9)     | 105.5     |
| C(18)-C(9)-H(9)     | 105.5     |
| C(9)-C(10)-C(11)    | 115.9(10) |
| C(9)-C(10)-H(10A)   | 108.3     |
| C(11)-C(10)-H(10A)  | 108.3     |
| C(9)-C(10)-H(10B)   | 108.3     |
| C(11)-C(10)-H(10B)  | 108.3     |
| H(10A)-C(10)-H(10B) | 107.4     |
| O(3)-C(11)-O(4)     | 126.6(13) |
| O(3)-C(11)-C(10)    | 119.3(13) |
| O(4)-C(11)-C(10)    | 114.1(13) |



|                   |           |
|-------------------|-----------|
| C(13)-C(12)-C(17) | 121.0(14) |
| C(13)-C(12)-O(4)  | 122.6(13) |
| C(17)-C(12)-O(4)  | 116.2(13) |
| C(12)-C(13)-C(14) | 119.6(12) |
| C(12)-C(13)-H(13) | 120.2     |
| C(14)-C(13)-H(13) | 120.2     |
| C(15)-C(14)-C(13) | 121.7(15) |
| C(15)-C(14)-H(14) | 119.1     |
| C(13)-C(14)-H(14) | 119.1     |
| C(14)-C(15)-C(16) | 118.2(17) |
| C(14)-C(15)-H(15) | 120.9     |
| C(16)-C(15)-H(15) | 120.9     |
| C(17)-C(16)-C(15) | 121.3(16) |
| C(17)-C(16)-H(16) | 119.3     |
| C(15)-C(16)-H(16) | 119.3     |
| C(16)-C(17)-C(12) | 118.1(15) |
| C(16)-C(17)-H(17) | 120.9     |
| C(12)-C(17)-H(17) | 120.9     |
| C(19)-C(18)-C(23) | 117.9(12) |
| C(19)-C(18)-C(9)  | 119.4(11) |
| C(23)-C(18)-C(9)  | 122.7(11) |
| C(18)-C(19)-C(20) | 119.7(12) |
| C(18)-C(19)-H(19) | 120.2     |
| C(20)-C(19)-H(19) | 120.2     |
| C(21)-C(20)-C(19) | 121.6(12) |
| C(21)-C(20)-H(20) | 119.2     |
| C(19)-C(20)-H(20) | 119.2     |
| C(22)-C(21)-C(20) | 118.5(12) |
| C(22)-C(21)-Cl(1) | 122.5(11) |
| C(20)-C(21)-Cl(1) | 118.8(11) |
| C(21)-C(22)-C(23) | 121.4(13) |
| C(21)-C(22)-H(22) | 119.3     |
| C(23)-C(22)-H(22) | 119.3     |
| C(22)-C(23)-C(18) | 120.7(13) |
| C(22)-C(23)-H(23) | 119.7     |
| C(18)-C(23)-H(23) | 119.7     |
| O(1A)-C(1A)-N(1A) | 125.0(10) |
| O(1A)-C(1A)-C(2A) | 129.8(9)  |

|                      |           |
|----------------------|-----------|
| N(1A)-C(1A)-C(2A)    | 105.2(9)  |
| C(7A)-C(2A)-C(3A)    | 121.9(10) |
| C(7A)-C(2A)-C(1A)    | 108.8(8)  |
| C(3A)-C(2A)-C(1A)    | 129.4(10) |
| C(4A)-C(3A)-C(2A)    | 115.6(11) |
| C(4A)-C(3A)-H(3A)    | 122.2     |
| C(2A)-C(3A)-H(3A)    | 122.2     |
| C(3A)-C(4A)-C(5A)    | 123.9(11) |
| C(3A)-C(4A)-H(4A)    | 118.0     |
| C(5A)-C(4A)-H(4A)    | 118.0     |
| C(6A)-C(5A)-C(4A)    | 118.0(11) |
| C(6A)-C(5A)-H(5A)    | 121.0     |
| C(4A)-C(5A)-H(5A)    | 121.0     |
| C(5A)-C(6A)-C(7A)    | 120.8(11) |
| C(5A)-C(6A)-H(6A)    | 119.6     |
| C(7A)-C(6A)-H(6A)    | 119.6     |
| C(2A)-C(7A)-C(6A)    | 119.6(9)  |
| C(2A)-C(7A)-C(8A)    | 109.0(8)  |
| C(6A)-C(7A)-C(8A)    | 131.3(9)  |
| O(2A)-C(8A)-N(1A)    | 125.7(9)  |
| O(2A)-C(8A)-C(7A)    | 129.3(9)  |
| N(1A)-C(8A)-C(7A)    | 105.0(8)  |
| N(1A)-C(9A)-C(10A)   | 110.4(8)  |
| N(1A)-C(9A)-C(18A)   | 110.4(8)  |
| C(10A)-C(9A)-C(18A)  | 114.7(8)  |
| N(1A)-C(9A)-H(9A)    | 107.0     |
| C(10A)-C(9A)-H(9A)   | 107.0     |
| C(18A)-C(9A)-H(9A)   | 107.0     |
| C(9A)-C(10A)-C(11A)  | 112.0(8)  |
| C(9A)-C(10A)-H(10C)  | 109.2     |
| C(11A)-C(10A)-H(10C) | 109.2     |
| C(9A)-C(10A)-H(10D)  | 109.2     |
| C(11A)-C(10A)-H(10D) | 109.2     |
| H(10C)-C(10A)-H(10D) | 107.9     |
| O(3A)-C(11A)-O(4A)   | 124.3(10) |
| O(3A)-C(11A)-C(10A)  | 123.0(10) |
| O(4A)-C(11A)-C(10A)  | 112.3(9)  |
| C(13A)-C(12A)-C(17A) | 122.2(11) |

|                      |           |
|----------------------|-----------|
| C(13A)-C(12A)-O(4A)  | 118.2(11) |
| C(17A)-C(12A)-O(4A)  | 119.5(10) |
| C(12A)-C(13A)-C(14A) | 119.5(13) |
| C(12A)-C(13A)-H(13A) | 120.2     |
| C(14A)-C(13A)-H(13A) | 120.2     |
| C(15A)-C(14A)-C(13A) | 119.6(13) |
| C(15A)-C(14A)-H(14A) | 120.2     |
| C(13A)-C(14A)-H(14A) | 120.2     |
| C(16A)-C(15A)-C(14A) | 120.5(12) |
| C(16A)-C(15A)-H(15A) | 119.8     |
| C(14A)-C(15A)-H(15A) | 119.8     |
| C(15A)-C(16A)-C(17A) | 120.5(12) |
| C(15A)-C(16A)-H(16A) | 119.7     |
| C(17A)-C(16A)-H(16A) | 119.7     |
| C(12A)-C(17A)-C(16A) | 117.5(11) |
| C(12A)-C(17A)-H(17A) | 121.3     |
| C(16A)-C(17A)-H(17A) | 121.2     |
| C(23A)-C(18A)-C(19A) | 115.9(11) |
| C(23A)-C(18A)-C(9A)  | 124.5(10) |
| C(19A)-C(18A)-C(9A)  | 119.5(10) |
| C(18A)-C(19A)-C(20A) | 123.0(12) |
| C(18A)-C(19A)-H(19A) | 118.5     |
| C(20A)-C(19A)-H(19A) | 118.5     |
| C(21A)-C(20A)-C(19A) | 117.4(12) |
| C(21A)-C(20A)-H(20A) | 121.3     |
| C(19A)-C(20A)-H(20A) | 121.3     |
| C(20A)-C(21A)-C(22A) | 122.2(13) |
| C(20A)-C(21A)-Cl(1A) | 119.0(12) |
| C(22A)-C(21A)-Cl(1A) | 118.8(14) |
| C(21A)-C(22A)-C(23A) | 120.2(14) |
| C(21A)-C(22A)-H(22A) | 119.9     |
| C(23A)-C(22A)-H(22A) | 119.9     |
| C(18A)-C(23A)-C(22A) | 121.2(12) |
| C(18A)-C(23A)-H(23A) | 119.4     |
| C(22A)-C(23A)-H(23A) | 119.4     |
| O(1B)-C(1B)-N(1B)    | 124.5(10) |
| O(1B)-C(1B)-C(2B)    | 131.0(12) |
| N(1B)-C(1B)-C(2B)    | 104.5(10) |

|                      |           |
|----------------------|-----------|
| C(7B)-C(2B)-C(3B)    | 123.8(15) |
| C(7B)-C(2B)-C(1B)    | 108.5(10) |
| C(3B)-C(2B)-C(1B)    | 127.7(16) |
| C(2B)-C(3B)-C(4B)    | 110.8(19) |
| C(2B)-C(3B)-H(3B)    | 124.6     |
| C(4B)-C(3B)-H(3B)    | 124.6     |
| C(5B)-C(4B)-C(3B)    | 122.4(19) |
| C(5B)-C(4B)-H(4B)    | 118.8     |
| C(3B)-C(4B)-H(4B)    | 118.8     |
| C(4B)-C(5B)-C(6B)    | 123(2)    |
| C(4B)-C(5B)-H(5B)    | 118.6     |
| C(6B)-C(5B)-H(5B)    | 118.6     |
| C(5B)-C(6B)-C(7B)    | 118(2)    |
| C(5B)-C(6B)-H(6B)    | 120.8     |
| C(7B)-C(6B)-H(6B)    | 120.8     |
| C(2B)-C(7B)-C(6B)    | 121.7(14) |
| C(2B)-C(7B)-C(8B)    | 110.6(11) |
| C(6B)-C(7B)-C(8B)    | 127.6(16) |
| O(2B)-C(8B)-N(1B)    | 124.8(10) |
| O(2B)-C(8B)-C(7B)    | 129.9(12) |
| N(1B)-C(8B)-C(7B)    | 105.2(11) |
| N(1B)-C(9B)-C(18B)   | 112.1(7)  |
| N(1B)-C(9B)-C(10B)   | 111.2(8)  |
| C(18B)-C(9B)-C(10B)  | 115.7(8)  |
| N(1B)-C(9B)-H(9B)    | 105.6     |
| C(18B)-C(9B)-H(9B)   | 105.6     |
| C(10B)-C(9B)-H(9B)   | 105.6     |
| C(11B)-C(10B)-C(9B)  | 112.4(8)  |
| C(11B)-C(10B)-H(10E) | 109.1     |
| C(9B)-C(10B)-H(10E)  | 109.1     |
| C(11B)-C(10B)-H(10F) | 109.1     |
| C(9B)-C(10B)-H(10F)  | 109.1     |
| H(10E)-C(10B)-H(10F) | 107.9     |
| O(3B)-C(11B)-O(4B)   | 119.8(9)  |
| O(3B)-C(11B)-C(10B)  | 126.0(12) |
| O(4B)-C(11B)-C(10B)  | 114.2(11) |
| C(13B)-C(12B)-C(17B) | 120.6(11) |
| C(13B)-C(12B)-O(4B)  | 121.1(9)  |

|                      |           |
|----------------------|-----------|
| C(17B)-C(12B)-O(4B)  | 118.3(10) |
| C(14B)-C(13B)-C(12B) | 119.0(11) |
| C(14B)-C(13B)-H(13B) | 120.5     |
| C(12B)-C(13B)-H(13B) | 120.5     |
| C(13B)-C(14B)-C(15B) | 122.0(12) |
| C(13B)-C(14B)-H(14B) | 119.0     |
| C(15B)-C(14B)-H(14B) | 119.0     |
| C(14B)-C(15B)-C(16B) | 117.9(12) |
| C(14B)-C(15B)-H(15B) | 121.0     |
| C(16B)-C(15B)-H(15B) | 121.0     |
| C(17B)-C(16B)-C(15B) | 121.9(11) |
| C(17B)-C(16B)-H(16B) | 119.0     |
| C(15B)-C(16B)-H(16B) | 119.0     |
| C(16B)-C(17B)-C(12B) | 118.6(11) |
| C(16B)-C(17B)-H(17B) | 120.7     |
| C(12B)-C(17B)-H(17B) | 120.7     |
| C(19B)-C(18B)-C(23B) | 116.5(10) |
| C(19B)-C(18B)-C(9B)  | 120.8(9)  |
| C(23B)-C(18B)-C(9B)  | 122.5(9)  |
| C(18B)-C(19B)-C(20B) | 123.3(10) |
| C(18B)-C(19B)-H(19B) | 118.4     |
| C(20B)-C(19B)-H(19B) | 118.4     |
| C(21B)-C(20B)-C(19B) | 117.5(10) |
| C(21B)-C(20B)-H(20B) | 121.2     |
| C(19B)-C(20B)-H(20B) | 121.2     |
| C(20B)-C(21B)-C(22B) | 121.4(11) |
| C(20B)-C(21B)-Cl(1B) | 116.4(10) |
| C(22B)-C(21B)-Cl(1B) | 122.2(9)  |
| C(21B)-C(22B)-C(23B) | 119.2(11) |
| C(21B)-C(22B)-H(22B) | 120.4     |
| C(23B)-C(22B)-H(22B) | 120.4     |
| C(18B)-C(23B)-C(22B) | 121.9(11) |
| C(18B)-C(23B)-H(23B) | 119.1     |
| C(22B)-C(23B)-H(23B) | 119.1     |
| O(1C)-C(1C)-N(1C)    | 124.7(12) |
| O(1C)-C(1C)-C(2C)    | 128.9(12) |
| N(1C)-C(1C)-C(2C)    | 106.3(10) |
| C(3C)-C(2C)-C(7C)    | 121.1(11) |

|                      |           |
|----------------------|-----------|
| C(3C)-C(2C)-C(1C)    | 132.0(11) |
| C(7C)-C(2C)-C(1C)    | 106.9(9)  |
| C(2C)-C(3C)-C(4C)    | 117.5(13) |
| C(2C)-C(3C)-H(3C)    | 121.3     |
| C(4C)-C(3C)-H(3C)    | 121.3     |
| C(5C)-C(4C)-C(3C)    | 122.8(13) |
| C(5C)-C(4C)-H(4C)    | 118.6     |
| C(3C)-C(4C)-H(4C)    | 118.6     |
| C(4C)-C(5C)-C(6C)    | 118.7(12) |
| C(4C)-C(5C)-H(5C)    | 120.6     |
| C(6C)-C(5C)-H(5C)    | 120.6     |
| C(7C)-C(6C)-C(5C)    | 119.1(12) |
| C(7C)-C(6C)-H(6C)    | 120.4     |
| C(5C)-C(6C)-H(6C)    | 120.4     |
| C(6C)-C(7C)-C(2C)    | 120.7(10) |
| C(6C)-C(7C)-C(8C)    | 129.6(11) |
| C(2C)-C(7C)-C(8C)    | 109.7(10) |
| O(2C)-C(8C)-N(1C)    | 124.1(11) |
| O(2C)-C(8C)-C(7C)    | 129.7(12) |
| N(1C)-C(8C)-C(7C)    | 106.1(10) |
| N(1C)-C(9C)-C(18C)   | 114.0(10) |
| N(1C)-C(9C)-C(10C)   | 110.1(11) |
| C(18C)-C(9C)-C(10C)  | 109.6(11) |
| N(1C)-C(9C)-H(9C)    | 107.6     |
| C(18C)-C(9C)-H(9C)   | 107.6     |
| C(10C)-C(9C)-H(9C)   | 107.6     |
| C(9C)-C(10C)-C(11')  | 113.7(16) |
| C(9C)-C(10C)-C(11C)  | 111(2)    |
| C(9C)-C(10C)-H(10G)  | 107.5     |
| C(11C)-C(10C)-H(10G) | 107.4     |
| C(9C)-C(10C)-H(10H)  | 109.1     |
| C(11C)-C(10C)-H(10H) | 111.1     |
| H(10G)-C(10C)-H(10H) | 110.6     |
| C(9C)-C(10C)-H(10X)  | 109.2     |
| C(11')-C(10C)-H(10X) | 109.6     |
| C(9C)-C(10C)-H(10Y)  | 108.3     |
| C(11')-C(10C)-H(10Y) | 106.8     |
| H(10X)-C(10C)-H(10Y) | 109.1     |

|                      |           |
|----------------------|-----------|
| C(11C)-O(3C)-C(12C)  | 100(2)    |
| O(3C)-C(11C)-O(4C)   | 119(3)    |
| O(3C)-C(11C)-C(10C)  | 111(2)    |
| O(4C)-C(11C)-C(10C)  | 127(3)    |
| C(13C)-C(12C)-C(17C) | 120.0     |
| C(13C)-C(12C)-O(3C)  | 89(2)     |
| C(17C)-C(12C)-O(3C)  | 141(2)    |
| C(12C)-C(13C)-C(14C) | 120.0     |
| C(12C)-C(13C)-H(13C) | 120.0     |
| C(14C)-C(13C)-H(13C) | 120.0     |
| C(15C)-C(14C)-C(13C) | 120.0     |
| C(15C)-C(14C)-H(14C) | 120.0     |
| C(13C)-C(14C)-H(14C) | 120.0     |
| C(14C)-C(15C)-C(16C) | 120.0     |
| C(14C)-C(15C)-H(15C) | 120.0     |
| C(16C)-C(15C)-H(15C) | 120.0     |
| C(15C)-C(16C)-C(17C) | 120.0     |
| C(15C)-C(16C)-H(16C) | 120.0     |
| C(17C)-C(16C)-H(16C) | 120.0     |
| C(16C)-C(17C)-C(12C) | 120.0     |
| C(16C)-C(17C)-H(17C) | 120.0     |
| C(12C)-C(17C)-H(17C) | 120.0     |
| C(11')-O(4')-C(12')  | 105.5(16) |
| O(3')-C(11')-O(4')   | 124(2)    |
| O(3')-C(11')-C(10C)  | 124.0(19) |
| O(4')-C(11')-C(10C)  | 112.1(17) |
| C(13')-C(12')-C(17') | 120.0     |
| C(13')-C(12')-O(4')  | 118.5(13) |
| C(17')-C(12')-O(4')  | 119.1(14) |
| C(12')-C(13')-C(14') | 120.0     |
| C(12')-C(13')-H(13') | 120.0     |
| C(14')-C(13')-H(13') | 120.0     |
| C(15')-C(14')-C(13') | 120.0     |
| C(15')-C(14')-H(14') | 120.0     |
| C(13')-C(14')-H(14') | 120.0     |
| C(14')-C(15')-C(16') | 120.0     |
| C(14')-C(15')-H(15') | 120.0     |
| C(16')-C(15')-H(15') | 120.0     |

|                      |           |
|----------------------|-----------|
| C(17')-C(16')-C(15') | 120.0     |
| C(17')-C(16')-H(16') | 120.0     |
| C(15')-C(16')-H(16') | 120.0     |
| C(16')-C(17')-C(12') | 120.0     |
| C(16')-C(17')-H(17') | 120.0     |
| C(12')-C(17')-H(17') | 120.0     |
| C(23C)-C(18C)-C(19C) | 120.0(13) |
| C(23C)-C(18C)-C(9C)  | 114.5(12) |
| C(19C)-C(18C)-C(9C)  | 125.5(12) |
| C(18C)-C(19C)-C(20C) | 117.3(13) |
| C(18C)-C(19C)-H(19C) | 121.4     |
| C(20C)-C(19C)-H(19C) | 121.4     |
| C(21C)-C(20C)-C(19C) | 118.2(15) |
| C(21C)-C(20C)-H(20C) | 120.9     |
| C(19C)-C(20C)-H(20C) | 120.9     |
| C(20C)-C(21C)-C(22C) | 125.6(17) |
| C(20C)-C(21C)-Cl(1C) | 115.0(17) |
| C(22C)-C(21C)-Cl(1C) | 119.4(15) |
| C(21C)-C(22C)-C(23C) | 114.1(17) |
| C(21C)-C(22C)-H(22C) | 123.0     |
| C(23C)-C(22C)-H(22C) | 123.0     |
| C(18C)-C(23C)-C(22C) | 124.5(15) |
| C(18C)-C(23C)-H(23C) | 117.7     |
| C(22C)-C(23C)-H(23C) | 117.7     |

---

Symmetry transformations used to generate equivalent atoms:



Table S4. Anisotropic displacement parameters ( $\text{\AA}^2 \times 10^3$ ) for **2b**. The anisotropic displacement factor exponent takes the form:  $-2\pi^2[ h^2 a^{*2}U^{11} + \dots + 2 h k a^* b^* U^{12} ]$

|        | U <sup>11</sup> | U <sup>22</sup> | U <sup>33</sup> | U <sup>23</sup> | U <sup>13</sup> | U <sup>12</sup> |
|--------|-----------------|-----------------|-----------------|-----------------|-----------------|-----------------|
| Cl(1)  | 156(3)          | 112(3)          | 123(3)          | -31(2)          | 33(2)           | -59(2)          |
| Cl(1A) | 182(4)          | 144(3)          | 113(3)          | -20(2)          | 61(3)           | -46(3)          |
| Cl(1B) | 120(2)          | 126(3)          | 91(2)           | -26(2)          | 23(2)           | -56(2)          |
| Cl(1C) | 325(7)          | 168(4)          | 104(3)          | -57(3)          | 81(4)           | -123(5)         |
| N(1)   | 87(6)           | 83(6)           | 91(6)           | -42(5)          | 4(5)            | -28(5)          |
| N(1A)  | 58(5)           | 74(5)           | 74(5)           | -31(4)          | 9(4)            | -18(4)          |
| N(1B)  | 42(4)           | 73(5)           | 80(5)           | -32(4)          | 1(3)            | -20(3)          |
| N(1C)  | 79(6)           | 115(7)          | 100(7)          | -63(6)          | 9(5)            | -20(5)          |
| O(1)   | 92(6)           | 141(7)          | 216(11)         | -122(8)         | 19(6)           | -43(5)          |
| O(2)   | 90(5)           | 156(8)          | 158(8)          | -104(7)         | 25(5)           | -44(5)          |
| O(3)   | 121(6)          | 109(6)          | 100(6)          | -41(5)          | 29(5)           | -44(5)          |
| O(4)   | 141(7)          | 114(7)          | 93(6)           | -41(6)          | 0(5)            | -58(6)          |
| O(1A)  | 64(4)           | 113(6)          | 124(6)          | -68(5)          | -2(4)           | -23(4)          |
| O(2A)  | 52(4)           | 116(6)          | 107(5)          | -49(4)          | 0(3)            | -21(4)          |
| O(3A)  | 82(5)           | 83(5)           | 142(7)          | 3(5)            | 24(5)           | -13(4)          |
| O(4A)  | 77(4)           | 83(5)           | 83(5)           | -20(4)          | 15(4)           | -20(4)          |
| O(1B)  | 129(7)          | 135(7)          | 154(8)          | -102(7)         | 39(6)           | -59(6)          |
| O(2B)  | 75(5)           | 131(7)          | 124(7)          | -70(6)          | 16(4)           | -21(4)          |
| O(3B)  | 94(5)           | 103(6)          | 95(5)           | -47(5)          | 18(4)           | -41(5)          |
| O(4B)  | 83(4)           | 78(5)           | 90(5)           | -26(4)          | 7(4)            | -31(4)          |
| O(1C)  | 125(7)          | 223(11)         | 155(8)          | -129(8)         | 17(6)           | -90(7)          |
| O(2C)  | 65(5)           | 208(11)         | 152(8)          | -96(8)          | -8(5)           | -26(6)          |
| C(1)   | 85(8)           | 94(8)           | 126(10)         | -64(8)          | 5(7)            | -27(7)          |
| C(2)   | 73(7)           | 105(9)          | 123(10)         | -41(8)          | -14(7)          | -41(7)          |
| C(3)   | 81(9)           | 130(11)         | 171(14)         | -68(10)         | 5(8)            | -43(8)          |
| C(4)   | 106(12)         | 154(14)         | 169(15)         | -56(12)         | 13(10)          | -75(11)         |
| C(5)   | 78(9)           | 190(17)         | 153(14)         | -65(13)         | 40(9)           | -54(11)         |
| C(6)   | 76(8)           | 168(12)         | 121(10)         | -73(9)          | 17(7)           | -57(8)          |
| C(7)   | 73(8)           | 120(9)          | 89(8)           | -44(7)          | 11(6)           | -44(7)          |
| C(8)   | 73(7)           | 113(9)          | 91(8)           | -54(7)          | 17(5)           | -37(7)          |
| C(9)   | 64(6)           | 91(7)           | 113(9)          | -32(7)          | -11(5)          | -37(6)          |
| C(10)  | 95(8)           | 120(9)          | 95(8)           | -30(7)          | -14(6)          | -59(7)          |
| C(11)  | 95(8)           | 111(10)         | 102(10)         | -46(9)          | 12(7)           | -51(7)          |

|        |         |         |         |          |        |          |
|--------|---------|---------|---------|----------|--------|----------|
| C(12)  | 110(10) | 82(8)   | 101(9)  | -32(8)   | -4(8)  | -38(8)   |
| C(13)  | 84(7)   | 86(8)   | 96(9)   | -33(8)   | 0(7)   | -15(7)   |
| C(14)  | 115(11) | 95(9)   | 117(11) | -44(9)   | 10(9)  | -24(8)   |
| C(15)  | 168(17) | 185(18) | 148(14) | -124(15) | 84(13) | -105(15) |
| C(16)  | 97(11)  | 160(16) | 200(20) | -120(16) | 29(12) | -40(12)  |
| C(17)  | 93(10)  | 119(11) | 165(15) | -85(11)  | 16(9)  | -27(9)   |
| C(18)  | 61(6)   | 87(8)   | 92(8)   | -41(7)   | 9(5)   | -20(5)   |
| C(19)  | 90(8)   | 87(8)   | 116(10) | -49(8)   | -1(7)  | -25(6)   |
| C(20)  | 101(8)  | 115(11) | 98(9)   | -51(8)   | 22(7)  | -40(8)   |
| C(21)  | 85(7)   | 93(9)   | 102(9)  | -43(7)   | 10(6)  | -30(6)   |
| C(22)  | 235(19) | 82(9)   | 143(13) | -61(10)  | 83(13) | -66(11)  |
| C(23)  | 185(15) | 104(11) | 142(13) | -72(10)  | 76(11) | -59(10)  |
| C(1A)  | 63(6)   | 76(6)   | 83(7)   | -30(6)   | 7(5)   | -25(5)   |
| C(2A)  | 72(7)   | 67(6)   | 70(6)   | -25(5)   | 14(5)  | -24(5)   |
| C(3A)  | 70(7)   | 95(8)   | 87(7)   | -48(7)   | 21(5)  | -19(6)   |
| C(4A)  | 96(9)   | 100(8)  | 98(9)   | -40(7)   | 40(7)  | -33(7)   |
| C(5A)  | 130(11) | 115(9)  | 74(7)   | -51(7)   | 27(7)  | -40(8)   |
| C(6A)  | 89(8)   | 108(9)  | 86(8)   | -48(7)   | -3(6)  | -25(7)   |
| C(7A)  | 73(6)   | 66(6)   | 64(6)   | -27(5)   | 4(5)   | -15(5)   |
| C(8A)  | 62(6)   | 73(6)   | 66(6)   | -22(5)   | 3(5)   | -24(5)   |
| C(9A)  | 63(5)   | 68(6)   | 84(7)   | -38(6)   | 13(5)  | -16(5)   |
| C(10A) | 76(6)   | 80(7)   | 93(8)   | -35(6)   | 26(6)  | -27(6)   |
| C(11A) | 73(7)   | 66(7)   | 110(9)  | -27(6)   | 14(7)  | -11(6)   |
| C(12A) | 72(6)   | 81(7)   | 88(8)   | -40(6)   | 0(5)   | -15(6)   |
| C(13A) | 143(11) | 154(12) | 106(10) | -66(10)  | 16(8)  | -90(10)  |
| C(14A) | 181(15) | 164(14) | 79(9)   | -53(10)  | 31(9)  | -89(13)  |
| C(15A) | 118(10) | 111(10) | 73(8)   | -20(7)   | 11(6)  | -42(8)   |
| C(16A) | 83(7)   | 83(8)   | 120(11) | -41(8)   | 10(7)  | -23(6)   |
| C(17A) | 97(7)   | 92(8)   | 75(7)   | -33(6)   | 5(6)   | -32(6)   |
| C(18A) | 78(7)   | 79(7)   | 70(7)   | -29(6)   | 6(5)   | -22(6)   |
| C(19A) | 77(7)   | 93(8)   | 106(10) | -38(8)   | 12(7)  | -14(6)   |
| C(20A) | 111(11) | 117(11) | 85(9)   | -20(8)   | -8(8)  | -14(9)   |
| C(21A) | 134(12) | 102(9)  | 73(8)   | -25(7)   | 32(8)  | -14(9)   |
| C(22A) | 130(12) | 185(15) | 95(10)  | -26(11)  | 16(9)  | -90(11)  |
| C(23A) | 104(9)  | 162(13) | 83(8)   | -30(8)   | 10(7)  | -67(9)   |
| C(1B)  | 88(8)   | 110(9)  | 91(8)   | -59(7)   | 25(6)  | -50(7)   |
| C(2B)  | 109(9)  | 150(11) | 86(8)   | -50(8)   | 16(7)  | -90(9)   |
| C(3B)  | 250(20) | 320(30) | 150(14) | -142(17) | 70(14) | -220(20) |

|        |         |         |         |          |        |          |
|--------|---------|---------|---------|----------|--------|----------|
| C(4B)  | 260(30) | 480(50) | 160(20) | -150(20) | 59(17) | -310(30) |
| C(5B)  | 162(19) | 460(50) | 103(14) | -90(20)  | 24(12) | -190(30) |
| C(6B)  | 103(10) | 290(20) | 97(10)  | -79(12)  | 23(7)  | -117(12) |
| C(7B)  | 79(8)   | 164(12) | 82(8)   | -50(8)   | 9(6)   | -64(8)   |
| C(8B)  | 70(7)   | 102(8)  | 77(7)   | -29(6)   | 5(5)   | -39(6)   |
| C(9B)  | 70(6)   | 75(6)   | 78(6)   | -38(5)   | 5(5)   | -23(5)   |
| C(10B) | 58(5)   | 88(7)   | 98(8)   | -32(6)   | 1(5)   | -24(5)   |
| C(11B) | 58(6)   | 87(8)   | 70(7)   | -24(6)   | 6(5)   | -22(5)   |
| C(12B) | 77(7)   | 76(7)   | 100(8)  | -47(7)   | 18(6)  | -30(6)   |
| C(13B) | 74(6)   | 73(7)   | 86(8)   | -28(6)   | 3(6)   | -14(6)   |
| C(14B) | 110(10) | 99(9)   | 88(8)   | -47(7)   | 21(7)  | -36(8)   |
| C(15B) | 111(10) | 102(9)  | 91(8)   | -43(8)   | 26(7)  | -54(8)   |
| C(16B) | 77(7)   | 122(10) | 110(10) | -56(9)   | 25(7)  | -30(8)   |
| C(17B) | 70(7)   | 83(7)   | 99(8)   | -34(6)   | 6(6)   | -17(6)   |
| C(18B) | 53(5)   | 68(6)   | 78(6)   | -40(5)   | 7(5)   | -23(5)   |
| C(19B) | 98(8)   | 96(9)   | 80(8)   | -37(7)   | 23(6)  | -25(7)   |
| C(20B) | 90(8)   | 75(7)   | 104(9)  | -40(7)   | 1(7)   | -6(6)    |
| C(21B) | 73(6)   | 92(8)   | 70(6)   | -30(6)   | 13(5)  | -32(6)   |
| C(22B) | 85(7)   | 97(9)   | 119(10) | -63(8)   | 30(7)  | -32(7)   |
| C(23B) | 92(7)   | 84(7)   | 104(9)  | -48(7)   | 24(6)  | -40(6)   |
| C(1C)  | 98(9)   | 122(10) | 120(10) | -71(8)   | 19(8)  | -51(8)   |
| C(2C)  | 57(6)   | 92(7)   | 102(8)  | -49(6)   | 14(5)  | -26(5)   |
| C(3C)  | 94(9)   | 132(11) | 129(11) | -60(10)  | 29(8)  | -50(8)   |
| C(4C)  | 127(12) | 101(9)  | 86(9)   | -37(8)   | 33(8)  | -31(8)   |
| C(5C)  | 146(12) | 75(7)   | 81(8)   | -37(6)   | 14(8)  | -28(8)   |
| C(6C)  | 115(10) | 89(8)   | 70(7)   | -25(6)   | -3(6)  | -32(7)   |
| C(7C)  | 79(7)   | 87(7)   | 65(6)   | -32(6)   | 12(5)  | -28(6)   |
| C(8C)  | 85(8)   | 120(9)  | 90(8)   | -54(7)   | 2(6)   | -25(7)   |
| C(9C)  | 112(9)  | 113(10) | 105(10) | -51(8)   | 40(7)  | -42(8)   |
| C(10C) | 240(20) | 80(9)   | 130(12) | -39(9)   | 32(12) | -57(11)  |
| O(3C)  | 219(14) | 160(11) | 124(9)  | -29(8)   | 5(9)   | -45(10)  |
| O(4C)  | 239(17) | 184(14) | 163(13) | -9(12)   | -1(13) | -36(13)  |
| C(11C) | 222(15) | 165(12) | 134(10) | -24(9)   | 1(10)  | -46(11)  |
| C(12C) | 214(14) | 150(10) | 115(9)  | -40(8)   | 3(9)   | -50(9)   |
| C(13C) | 211(14) | 143(11) | 109(9)  | -46(8)   | 2(9)   | -52(9)   |
| C(14C) | 210(14) | 141(11) | 104(9)  | -49(8)   | 2(9)   | -54(10)  |
| C(15C) | 210(14) | 138(11) | 97(9)   | -52(8)   | 1(9)   | -57(10)  |
| C(16C) | 213(14) | 146(11) | 104(9)  | -47(8)   | 0(9)   | -54(10)  |

|        |         |         |         |         |        |         |
|--------|---------|---------|---------|---------|--------|---------|
| C(17C) | 214(14) | 148(11) | 111(9)  | -44(8)  | 1(9)   | -53(9)  |
| O(3')  | 147(10) | 93(9)   | 147(11) | -19(8)  | 71(9)  | -32(8)  |
| O(4')  | 98(7)   | 96(6)   | 105(7)  | -47(6)  | 29(6)  | -38(5)  |
| C(11') | 108(8)  | 92(7)   | 113(8)  | -44(7)  | 40(7)  | -39(6)  |
| C(12') | 98(6)   | 100(6)  | 105(7)  | -48(6)  | 18(6)  | -40(5)  |
| C(13') | 99(7)   | 97(7)   | 106(7)  | -51(6)  | 20(6)  | -38(6)  |
| C(14') | 104(7)  | 101(7)  | 106(8)  | -47(7)  | 23(7)  | -35(6)  |
| C(15') | 106(7)  | 109(7)  | 104(8)  | -42(7)  | 19(7)  | -33(6)  |
| C(16') | 103(7)  | 107(7)  | 102(7)  | -50(7)  | 13(6)  | -33(6)  |
| C(17') | 99(7)   | 103(7)  | 102(7)  | -51(6)  | 13(6)  | -36(6)  |
| C(18C) | 90(8)   | 91(8)   | 81(8)   | -37(7)  | 22(7)  | -23(6)  |
| C(19C) | 107(10) | 166(14) | 136(13) | -55(12) | 11(10) | -45(10) |
| C(20C) | 166(15) | 139(13) | 66(8)   | -22(8)  | -6(8)  | -32(11) |
| C(21C) | 146(14) | 144(13) | 139(14) | -87(12) | 79(13) | -80(12) |
| C(22C) | 148(16) | 142(14) | 154(17) | -38(13) | 13(14) | -36(12) |
| C(23C) | 86(9)   | 149(13) | 102(10) | -15(10) | 19(7)  | -4(8)   |

---

Table S5. Hydrogen coordinates ( $\times 10^4$ ) and isotropic displacement parameters ( $\text{\AA}^2 \times 10^{-3}$ ) for **2b**.

|        | x     | y     | z     | U(eq) |
|--------|-------|-------|-------|-------|
| H(3)   | 10810 | 10973 | 9533  | 148   |
| H(4)   | 13019 | 10405 | 9409  | 167   |
| H(5)   | 13998 | 8900  | 9112  | 170   |
| H(6)   | 12621 | 8191  | 8565  | 136   |
| H(9)   | 6721  | 10170 | 8634  | 108   |
| H(10A) | 6065  | 9744  | 7525  | 123   |
| H(10B) | 7507  | 8940  | 7589  | 123   |
| H(13)  | 5922  | 12391 | 4798  | 113   |
| H(14)  | 6606  | 13570 | 3503  | 135   |
| H(15)  | 8780  | 13211 | 3282  | 166   |
| H(16)  | 10327 | 11532 | 4294  | 167   |
| H(17)  | 9661  | 10312 | 5561  | 143   |
| H(19)  | 6092  | 9428  | 10125 | 116   |
| H(20)  | 5711  | 8016  | 11369 | 122   |
| H(22)  | 7282  | 6041  | 10170 | 177   |
| H(23)  | 7875  | 7371  | 8993  | 163   |
| H(3A)  | 13253 | 7484  | 2253  | 100   |
| H(4A)  | 13003 | 6885  | 1124  | 119   |
| H(5A)  | 10928 | 6920  | 622   | 124   |
| H(6A)  | 9075  | 7759  | 1124  | 112   |
| H(9A)  | 9855  | 9578  | 3914  | 85    |
| H(10C) | 7721  | 10901 | 3455  | 100   |
| H(10D) | 7388  | 10398 | 2799  | 100   |
| H(13A) | 7736  | 12232 | 7     | 144   |
| H(14A) | 8490  | 13305 | -1320 | 160   |
| H(15A) | 9366  | 14544 | -1230 | 128   |
| H(16A) | 9600  | 14648 | 173   | 117   |
| H(17A) | 8972  | 13479 | 1547  | 107   |
| H(19A) | 10311 | 8154  | 5430  | 117   |
| H(20A) | 9612  | 7115  | 6824  | 142   |
| H(22A) | 6111  | 7993  | 5412  | 167   |
| H(23A) | 6777  | 9058  | 4023  | 142   |

|        |       |       |       |     |
|--------|-------|-------|-------|-----|
| H(3B)  | 1589  | 2091  | 5850  | 227 |
| H(4B)  | -858  | 2531  | 5968  | 297 |
| H(5B)  | -1891 | 3545  | 6698  | 272 |
| H(6B)  | -900  | 4469  | 7140  | 184 |
| H(9B)  | 3925  | 4449  | 7518  | 87  |
| H(10E) | 5834  | 2611  | 7413  | 101 |
| H(10F) | 6026  | 3204  | 8029  | 101 |
| H(13B) | 5999  | 834   | 10854 | 99  |
| H(14B) | 5140  | -229  | 12084 | 116 |
| H(15B) | 2873  | 175   | 12119 | 116 |
| H(16B) | 1448  | 1706  | 10878 | 122 |
| H(17B) | 2262  | 2787  | 9641  | 106 |
| H(19B) | 3443  | 6152  | 6283  | 112 |
| H(20B) | 3974  | 7364  | 4902  | 114 |
| H(22B) | 6433  | 4827  | 4527  | 114 |
| H(23B) | 5824  | 3650  | 5875  | 106 |
| H(3C)  | -1302 | 5454  | 3287  | 137 |
| H(4C)  | -1394 | 6179  | 4379  | 130 |
| H(5C)  | 490   | 6175  | 5050  | 122 |
| H(6C)  | 2552  | 5508  | 4559  | 113 |
| H(9C)  | 4356  | 3496  | 2510  | 130 |
| H(10G) | 2253  | 2861  | 2238  | 183 |
| H(10H) | 3615  | 2434  | 1859  | 183 |
| H(10X) | 3946  | 2225  | 2142  | 183 |
| H(10Y) | 2405  | 2885  | 1915  | 183 |
| H(13C) | 2444  | -7    | 3989  | 190 |
| H(14C) | 2159  | -1364 | 5376  | 185 |
| H(15C) | 3277  | -1788 | 6822  | 177 |
| H(16C) | 4680  | -856  | 6880  | 190 |
| H(17C) | 4964  | 501   | 5492  | 196 |
| H(13') | 2834  | -530  | 4327  | 116 |
| H(14') | 2765  | -1688 | 5890  | 123 |
| H(15') | 3274  | -1312 | 7130  | 130 |
| H(16') | 3852  | 224   | 6808  | 124 |
| H(17') | 3921  | 1383  | 5246  | 119 |
| H(19C) | 1606  | 4934  | 616   | 168 |
| H(20C) | 2047  | 5860  | -1034 | 163 |
| H(22C) | 5875  | 4950  | -146  | 192 |

H(23C)

5455

3898

1388

163

---

Table S6. Torsion angles [°] for **2b**.

---

|                        |            |
|------------------------|------------|
| C(8)-N(1)-C(1)-O(1)    | 179.5(13)  |
| C(9)-N(1)-C(1)-O(1)    | 3.6(19)    |
| C(8)-N(1)-C(1)-C(2)    | 2.5(13)    |
| C(9)-N(1)-C(1)-C(2)    | -173.4(10) |
| O(1)-C(1)-C(2)-C(3)    | 5(3)       |
| N(1)-C(1)-C(2)-C(3)    | -178.7(15) |
| O(1)-C(1)-C(2)-C(7)    | -178.3(15) |
| N(1)-C(1)-C(2)-C(7)    | -1.7(14)   |
| C(7)-C(2)-C(3)-C(4)    | 0(2)       |
| C(1)-C(2)-C(3)-C(4)    | 176.7(14)  |
| C(2)-C(3)-C(4)-C(5)    | -5(3)      |
| C(3)-C(4)-C(5)-C(6)    | 8(3)       |
| C(4)-C(5)-C(6)-C(7)    | -5(2)      |
| C(5)-C(6)-C(7)-C(2)    | 0(2)       |
| C(5)-C(6)-C(7)-C(8)    | -173.8(13) |
| C(3)-C(2)-C(7)-C(6)    | 3(2)       |
| C(1)-C(2)-C(7)-C(6)    | -174.6(11) |
| C(3)-C(2)-C(7)-C(8)    | 177.6(13)  |
| C(1)-C(2)-C(7)-C(8)    | 0.3(13)    |
| C(1)-N(1)-C(8)-O(2)    | -178.9(13) |
| C(9)-N(1)-C(8)-O(2)    | -3.0(19)   |
| C(1)-N(1)-C(8)-C(7)    | -2.3(12)   |
| C(9)-N(1)-C(8)-C(7)    | 173.6(9)   |
| C(6)-C(7)-C(8)-O(2)    | -8(2)      |
| C(2)-C(7)-C(8)-O(2)    | 177.8(13)  |
| C(6)-C(7)-C(8)-N(1)    | 175.4(13)  |
| C(2)-C(7)-C(8)-N(1)    | 1.2(13)    |
| C(8)-N(1)-C(9)-C(10)   | -49.9(14)  |
| C(1)-N(1)-C(9)-C(10)   | 125.5(12)  |
| C(8)-N(1)-C(9)-C(18)   | 81.5(13)   |
| C(1)-N(1)-C(9)-C(18)   | -103.1(12) |
| N(1)-C(9)-C(10)-C(11)  | -49.5(14)  |
| C(18)-C(9)-C(10)-C(11) | -179.0(10) |
| C(12)-O(4)-C(11)-O(3)  | 3.9(19)    |
| C(12)-O(4)-C(11)-C(10) | -176.5(10) |
| C(9)-C(10)-C(11)-O(3)  | -15.8(16)  |



|                         |            |
|-------------------------|------------|
| C(9)-C(10)-C(11)-O(4)   | 164.6(11)  |
| C(11)-O(4)-C(12)-C(13)  | -90.2(14)  |
| C(11)-O(4)-C(12)-C(17)  | 94.2(14)   |
| C(17)-C(12)-C(13)-C(14) | 0.2(19)    |
| O(4)-C(12)-C(13)-C(14)  | -175.1(11) |
| C(12)-C(13)-C(14)-C(15) | -2(2)      |
| C(13)-C(14)-C(15)-C(16) | 3(2)       |
| C(14)-C(15)-C(16)-C(17) | -2(2)      |
| C(15)-C(16)-C(17)-C(12) | 0(2)       |
| C(13)-C(12)-C(17)-C(16) | 1(2)       |
| O(4)-C(12)-C(17)-C(16)  | 176.6(12)  |
| N(1)-C(9)-C(18)-C(19)   | 94.9(12)   |
| C(10)-C(9)-C(18)-C(19)  | -134.9(11) |
| N(1)-C(9)-C(18)-C(23)   | -82.9(15)  |
| C(10)-C(9)-C(18)-C(23)  | 47.4(15)   |
| C(23)-C(18)-C(19)-C(20) | 0.4(17)    |
| C(9)-C(18)-C(19)-C(20)  | -177.4(10) |
| C(18)-C(19)-C(20)-C(21) | -0.7(18)   |
| C(19)-C(20)-C(21)-C(22) | -2(2)      |
| C(19)-C(20)-C(21)-Cl(1) | -178.3(9)  |
| C(20)-C(21)-C(22)-C(23) | 6(3)       |
| Cl(1)-C(21)-C(22)-C(23) | -178.5(14) |
| C(21)-C(22)-C(23)-C(18) | -6(3)      |
| C(19)-C(18)-C(23)-C(22) | 3(2)       |
| C(9)-C(18)-C(23)-C(22)  | -179.3(15) |
| C(8A)-N(1A)-C(1A)-O(1A) | -179.0(10) |
| C(9A)-N(1A)-C(1A)-O(1A) | 8.7(14)    |
| C(8A)-N(1A)-C(1A)-C(2A) | -0.6(10)   |
| C(9A)-N(1A)-C(1A)-C(2A) | -172.9(8)  |
| O(1A)-C(1A)-C(2A)-C(7A) | 177.9(11)  |
| N(1A)-C(1A)-C(2A)-C(7A) | -0.5(10)   |
| O(1A)-C(1A)-C(2A)-C(3A) | -0.4(18)   |
| N(1A)-C(1A)-C(2A)-C(3A) | -178.7(9)  |
| C(7A)-C(2A)-C(3A)-C(4A) | 1.3(15)    |
| C(1A)-C(2A)-C(3A)-C(4A) | 179.3(10)  |
| C(2A)-C(3A)-C(4A)-C(5A) | -2.4(17)   |
| C(3A)-C(4A)-C(5A)-C(6A) | 3.8(19)    |
| C(4A)-C(5A)-C(6A)-C(7A) | -3.7(18)   |

|                             |            |
|-----------------------------|------------|
| C(3A)-C(2A)-C(7A)-C(6A)     | -1.4(14)   |
| C(1A)-C(2A)-C(7A)-C(6A)     | -179.8(9)  |
| C(3A)-C(2A)-C(7A)-C(8A)     | 179.7(9)   |
| C(1A)-C(2A)-C(7A)-C(8A)     | 1.3(11)    |
| C(5A)-C(6A)-C(7A)-C(2A)     | 2.7(16)    |
| C(5A)-C(6A)-C(7A)-C(8A)     | -178.7(11) |
| C(1A)-N(1A)-C(8A)-O(2A)     | -179.9(9)  |
| C(9A)-N(1A)-C(8A)-O(2A)     | -8.2(15)   |
| C(1A)-N(1A)-C(8A)-C(7A)     | 1.3(10)    |
| C(9A)-N(1A)-C(8A)-C(7A)     | 173.0(8)   |
| C(2A)-C(7A)-C(8A)-O(2A)     | 179.6(10)  |
| C(6A)-C(7A)-C(8A)-O(2A)     | 0.9(18)    |
| C(2A)-C(7A)-C(8A)-N(1A)     | -1.6(10)   |
| C(6A)-C(7A)-C(8A)-N(1A)     | 179.6(10)  |
| C(8A)-N(1A)-C(9A)-C(10A)    | -50.2(12)  |
| C(1A)-N(1A)-C(9A)-C(10A)    | 120.8(9)   |
| C(8A)-N(1A)-C(9A)-C(18A)    | 77.6(11)   |
| C(1A)-N(1A)-C(9A)-C(18A)    | -111.3(9)  |
| N(1A)-C(9A)-C(10A)-C(11A)   | -60.6(11)  |
| C(18A)-C(9A)-C(10A)-C(11A)  | 173.9(9)   |
| C(12A)-O(4A)-C(11A)-O(3A)   | 10.2(17)   |
| C(12A)-O(4A)-C(11A)-C(10A)  | -176.7(9)  |
| C(9A)-C(10A)-C(11A)-O(3A)   | -13.1(16)  |
| C(9A)-C(10A)-C(11A)-O(4A)   | 173.6(9)   |
| C(11A)-O(4A)-C(12A)-C(13A)  | 97.0(13)   |
| C(11A)-O(4A)-C(12A)-C(17A)  | -79.0(12)  |
| C(17A)-C(12A)-C(13A)-C(14A) | -3(2)      |
| O(4A)-C(12A)-C(13A)-C(14A)  | -178.8(12) |
| C(12A)-C(13A)-C(14A)-C(15A) | -1(2)      |
| C(13A)-C(14A)-C(15A)-C(16A) | 2(2)       |
| C(14A)-C(15A)-C(16A)-C(17A) | 0.1(19)    |
| C(13A)-C(12A)-C(17A)-C(16A) | 5.1(16)    |
| O(4A)-C(12A)-C(17A)-C(16A)  | -179.1(8)  |
| C(15A)-C(16A)-C(17A)-C(12A) | -3.7(16)   |
| N(1A)-C(9A)-C(18A)-C(23A)   | -87.1(13)  |
| C(10A)-C(9A)-C(18A)-C(23A)  | 38.4(16)   |
| N(1A)-C(9A)-C(18A)-C(19A)   | 93.5(11)   |
| C(10A)-C(9A)-C(18A)-C(19A)  | -141.0(10) |

|                             |            |
|-----------------------------|------------|
| C(23A)-C(18A)-C(19A)-C(20A) | -1.2(18)   |
| C(9A)-C(18A)-C(19A)-C(20A)  | 178.3(11)  |
| C(18A)-C(19A)-C(20A)-C(21A) | 1(2)       |
| C(19A)-C(20A)-C(21A)-C(22A) | 1(2)       |
| C(19A)-C(20A)-C(21A)-Cl(1A) | 179.6(10)  |
| C(20A)-C(21A)-C(22A)-C(23A) | -1(3)      |
| Cl(1A)-C(21A)-C(22A)-C(23A) | 179.8(12)  |
| C(19A)-C(18A)-C(23A)-C(22A) | 1(2)       |
| C(9A)-C(18A)-C(23A)-C(22A)  | -178.9(13) |
| C(21A)-C(22A)-C(23A)-C(18A) | 1(3)       |
| C(8B)-N(1B)-C(1B)-O(1B)     | 178.6(12)  |
| C(9B)-N(1B)-C(1B)-O(1B)     | -1.4(18)   |
| C(8B)-N(1B)-C(1B)-C(2B)     | -0.3(11)   |
| C(9B)-N(1B)-C(1B)-C(2B)     | 179.7(9)   |
| O(1B)-C(1B)-C(2B)-C(7B)     | -179.4(14) |
| N(1B)-C(1B)-C(2B)-C(7B)     | -0.5(14)   |
| O(1B)-C(1B)-C(2B)-C(3B)     | 0(2)       |
| N(1B)-C(1B)-C(2B)-C(3B)     | 179.2(14)  |
| C(7B)-C(2B)-C(3B)-C(4B)     | 1(3)       |
| C(1B)-C(2B)-C(3B)-C(4B)     | -179.2(17) |
| C(2B)-C(3B)-C(4B)-C(5B)     | -2(4)      |
| C(3B)-C(4B)-C(5B)-C(6B)     | 5(5)       |
| C(4B)-C(5B)-C(6B)-C(7B)     | -6(4)      |
| C(3B)-C(2B)-C(7B)-C(6B)     | -1(2)      |
| C(1B)-C(2B)-C(7B)-C(6B)     | 178.3(12)  |
| C(3B)-C(2B)-C(7B)-C(8B)     | -178.6(14) |
| C(1B)-C(2B)-C(7B)-C(8B)     | 1.1(15)    |
| C(5B)-C(6B)-C(7B)-C(2B)     | 4(2)       |
| C(5B)-C(6B)-C(7B)-C(8B)     | -179.3(17) |
| C(1B)-N(1B)-C(8B)-O(2B)     | 178.8(11)  |
| C(9B)-N(1B)-C(8B)-O(2B)     | -1.2(15)   |
| C(1B)-N(1B)-C(8B)-C(7B)     | 1.0(11)    |
| C(9B)-N(1B)-C(8B)-C(7B)     | -179.0(9)  |
| C(2B)-C(7B)-C(8B)-O(2B)     | -179.0(13) |
| C(6B)-C(7B)-C(8B)-O(2B)     | 4(2)       |
| C(2B)-C(7B)-C(8B)-N(1B)     | -1.3(14)   |
| C(6B)-C(7B)-C(8B)-N(1B)     | -178.3(13) |
| C(1B)-N(1B)-C(9B)-C(18B)    | 73.7(12)   |

|                             |            |
|-----------------------------|------------|
| C(8B)-N(1B)-C(9B)-C(18B)    | -106.3(10) |
| C(1B)-N(1B)-C(9B)-C(10B)    | -57.5(13)  |
| C(8B)-N(1B)-C(9B)-C(10B)    | 122.5(9)   |
| N(1B)-C(9B)-C(10B)-C(11B)   | -45.7(12)  |
| C(18B)-C(9B)-C(10B)-C(11B)  | -175.0(10) |
| C(12B)-O(4B)-C(11B)-O(3B)   | 0.2(13)    |
| C(12B)-O(4B)-C(11B)-C(10B)  | 178.8(8)   |
| C(9B)-C(10B)-C(11B)-O(3B)   | 96.1(12)   |
| C(9B)-C(10B)-C(11B)-O(4B)   | -82.4(10)  |
| C(11B)-O(4B)-C(12B)-C(13B)  | 90.7(11)   |
| C(11B)-O(4B)-C(12B)-C(17B)  | -89.6(11)  |
| C(17B)-C(12B)-C(13B)-C(14B) | 2.3(16)    |
| O(4B)-C(12B)-C(13B)-C(14B)  | -178.0(10) |
| C(12B)-C(13B)-C(14B)-C(15B) | -0.9(17)   |
| C(13B)-C(14B)-C(15B)-C(16B) | -0.5(18)   |
| C(14B)-C(15B)-C(16B)-C(17B) | 0.5(19)    |
| C(15B)-C(16B)-C(17B)-C(12B) | 0.9(18)    |
| C(13B)-C(12B)-C(17B)-C(16B) | -2.3(16)   |
| O(4B)-C(12B)-C(17B)-C(16B)  | 177.9(10)  |
| N(1B)-C(9B)-C(18B)-C(19B)   | 88.7(11)   |
| C(10B)-C(9B)-C(18B)-C(19B)  | -142.3(10) |
| N(1B)-C(9B)-C(18B)-C(23B)   | -85.2(11)  |
| C(10B)-C(9B)-C(18B)-C(23B)  | 43.7(12)   |
| C(23B)-C(18B)-C(19B)-C(20B) | -4.4(16)   |
| C(9B)-C(18B)-C(19B)-C(20B)  | -178.7(10) |
| C(18B)-C(19B)-C(20B)-C(21B) | -0.1(18)   |
| C(19B)-C(20B)-C(21B)-C(22B) | 3.7(17)    |
| C(19B)-C(20B)-C(21B)-Cl(1B) | -177.7(9)  |
| C(20B)-C(21B)-C(22B)-C(23B) | -2.6(17)   |
| Cl(1B)-C(21B)-C(22B)-C(23B) | 178.9(8)   |
| C(19B)-C(18B)-C(23B)-C(22B) | 5.6(15)    |
| C(9B)-C(18B)-C(23B)-C(22B)  | 179.8(9)   |
| C(21B)-C(22B)-C(23B)-C(18B) | -2.3(17)   |
| C(8C)-N(1C)-C(1C)-O(1C)     | 178.4(13)  |
| C(9C)-N(1C)-C(1C)-O(1C)     | -13(2)     |
| C(8C)-N(1C)-C(1C)-C(2C)     | 2.0(13)    |
| C(9C)-N(1C)-C(1C)-C(2C)     | 170.3(11)  |
| O(1C)-C(1C)-C(2C)-C(3C)     | 2(2)       |

|                            |            |
|----------------------------|------------|
| N(1C)-C(1C)-C(2C)-C(3C)    | 177.8(13)  |
| O(1C)-C(1C)-C(2C)-C(7C)    | -177.3(14) |
| N(1C)-C(1C)-C(2C)-C(7C)    | -1.1(13)   |
| C(7C)-C(2C)-C(3C)-C(4C)    | 0.8(19)    |
| C(1C)-C(2C)-C(3C)-C(4C)    | -177.9(12) |
| C(2C)-C(3C)-C(4C)-C(5C)    | -1(2)      |
| C(3C)-C(4C)-C(5C)-C(6C)    | 1.5(19)    |
| C(4C)-C(5C)-C(6C)-C(7C)    | -2.2(17)   |
| C(5C)-C(6C)-C(7C)-C(2C)    | 2.3(16)    |
| C(5C)-C(6C)-C(7C)-C(8C)    | 179.3(11)  |
| C(3C)-C(2C)-C(7C)-C(6C)    | -1.7(18)   |
| C(1C)-C(2C)-C(7C)-C(6C)    | 177.4(10)  |
| C(3C)-C(2C)-C(7C)-C(8C)    | -179.2(11) |
| C(1C)-C(2C)-C(7C)-C(8C)    | -0.1(13)   |
| C(1C)-N(1C)-C(8C)-O(2C)    | 179.7(13)  |
| C(9C)-N(1C)-C(8C)-O(2C)    | 9.5(19)    |
| C(1C)-N(1C)-C(8C)-C(7C)    | -2.0(13)   |
| C(9C)-N(1C)-C(8C)-C(7C)    | -172.3(9)  |
| C(6C)-C(7C)-C(8C)-O(2C)    | 2(2)       |
| C(2C)-C(7C)-C(8C)-O(2C)    | 179.4(14)  |
| C(6C)-C(7C)-C(8C)-N(1C)    | -175.9(11) |
| C(2C)-C(7C)-C(8C)-N(1C)    | 1.3(13)    |
| C(8C)-N(1C)-C(9C)-C(18C)   | -111.6(13) |
| C(1C)-N(1C)-C(9C)-C(18C)   | 80.6(16)   |
| C(8C)-N(1C)-C(9C)-C(10C)   | 124.7(12)  |
| C(1C)-N(1C)-C(9C)-C(10C)   | -43.1(18)  |
| N(1C)-C(9C)-C(10C)-C(11')  | -46.9(19)  |
| C(18C)-C(9C)-C(10C)-C(11') | -173.1(15) |
| N(1C)-C(9C)-C(10C)-C(11C)  | -78(2)     |
| C(18C)-C(9C)-C(10C)-C(11C) | 156(2)     |
| C(12C)-O(3C)-C(11C)-O(4C)  | 5(6)       |
| C(12C)-O(3C)-C(11C)-C(10C) | 168(3)     |
| C(9C)-C(10C)-C(11C)-O(3C)  | 131(4)     |
| C(11')-C(10C)-C(11C)-O(3C) | 30(3)      |
| C(9C)-C(10C)-C(11C)-O(4C)  | -68(6)     |
| C(11')-C(10C)-C(11C)-O(4C) | -169(10)   |
| C(11C)-O(3C)-C(12C)-C(13C) | -150(4)    |
| C(11C)-O(3C)-C(12C)-C(17C) | 70(5)      |

|                             |            |
|-----------------------------|------------|
| C(17C)-C(12C)-C(13C)-C(14C) | 0.0        |
| O(3C)-C(12C)-C(13C)-C(14C)  | -152(2)    |
| C(12C)-C(13C)-C(14C)-C(15C) | 0.0        |
| C(13C)-C(14C)-C(15C)-C(16C) | 0.0        |
| C(14C)-C(15C)-C(16C)-C(17C) | 0.0        |
| C(15C)-C(16C)-C(17C)-C(12C) | 0.0        |
| C(13C)-C(12C)-C(17C)-C(16C) | 0.0        |
| O(3C)-C(12C)-C(17C)-C(16C)  | 131(3)     |
| C(12')-O(4')-C(11')-O(3')   | 1(4)       |
| C(12')-O(4')-C(11')-C(10C)  | -175.7(19) |
| C(9C)-C(10C)-C(11')-O(3')   | 61(4)      |
| C(11C)-C(10C)-C(11')-O(3')  | 153(7)     |
| C(9C)-C(10C)-C(11')-O(4')   | -122(2)    |
| C(11C)-C(10C)-C(11')-O(4')  | -31(4)     |
| C(11')-O(4')-C(12')-C(13')  | 120.4(19)  |
| C(11')-O(4')-C(12')-C(17')  | -77(2)     |
| C(17')-C(12')-C(13')-C(14') | 0.0        |
| O(4')-C(12')-C(13')-C(14')  | 162.0(16)  |
| C(12')-C(13')-C(14')-C(15') | 0.0        |
| C(13')-C(14')-C(15')-C(16') | 0.0        |
| C(14')-C(15')-C(16')-C(17') | 0.0        |
| C(15')-C(16')-C(17')-C(12') | 0.0        |
| C(13')-C(12')-C(17')-C(16') | 0.0        |
| O(4')-C(12')-C(17')-C(16')  | -161.9(16) |
| N(1C)-C(9C)-C(18C)-C(23C)   | 128.7(13)  |
| C(10C)-C(9C)-C(18C)-C(23C)  | -107.3(15) |
| N(1C)-C(9C)-C(18C)-C(19C)   | -51.6(19)  |
| C(10C)-C(9C)-C(18C)-C(19C)  | 72.3(18)   |
| C(23C)-C(18C)-C(19C)-C(20C) | 0(2)       |
| C(9C)-C(18C)-C(19C)-C(20C)  | -179.2(13) |
| C(18C)-C(19C)-C(20C)-C(21C) | -2(2)      |
| C(19C)-C(20C)-C(21C)-C(22C) | 0(3)       |
| C(19C)-C(20C)-C(21C)-Cl(1C) | -178.3(12) |
| C(20C)-C(21C)-C(22C)-C(23C) | 4(3)       |
| Cl(1C)-C(21C)-C(22C)-C(23C) | -177.8(12) |
| C(19C)-C(18C)-C(23C)-C(22C) | 4(3)       |
| C(9C)-C(18C)-C(23C)-C(22C)  | -176.3(15) |
| C(21C)-C(22C)-C(23C)-C(18C) | -6(3)      |

---

Symmetry transformations used to generate equivalent atoms:

Table S7. Hydrogen bonds for **2b** [ $\text{\AA}$  and  $^\circ$ ].

| D-H...A                 | d(D-H) | d(H...A) | d(D...A)  | $\angle(\text{DHA})$ |
|-------------------------|--------|----------|-----------|----------------------|
| C(9)-H(9)...O(3B)#1     | 0.98   | 2.39     | 3.311(14) | 157.2                |
| C(10)-H(10B)...O(2)     | 0.97   | 2.50     | 3.021(15) | 113.7                |
| C(10A)-H(10D)...O(2A)   | 0.97   | 2.45     | 3.070(14) | 121.3                |
| C(13A)-H(13A)...O(1)#2  | 0.93   | 2.59     | 3.357(16) | 140.4                |
| C(10B)-H(10E)...O(3)#3  | 0.97   | 2.50     | 3.426(14) | 160.5                |
| C(10C)-H(10G)...O(1C)   | 0.96   | 2.41     | 3.14(2)   | 132.8                |
| C(13')-H(13')...O(1A)#4 | 0.93   | 2.57     | 3.440(15) | 156.5                |

Symmetry transformations used to generate equivalent atoms:

#1  $x, y+1, z$     #2  $x, y, z-1$     #3  $x, y-1, z$     #4  $x-1, y-1, z$



## The determination of enantiomeric excess

**Table 3, 2a**

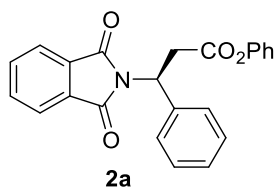

**HPLC Condition:** **Column:** Chiralpak AD-H, Daicel Chemical Industries, Ltd.;  
**Eluent:** Hexanes/IPA (90/10); **Flow rate:** 1.0 mL/min; **Detection:** UV219 nm.

**Racemic standard**

**Enantio-enriched product**

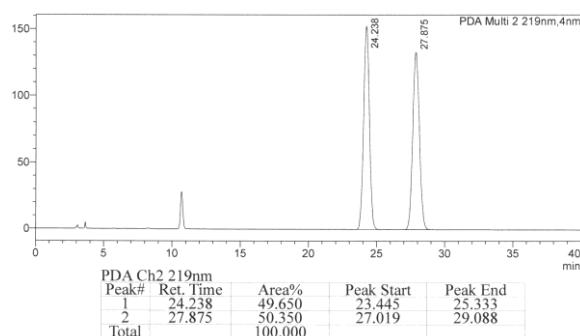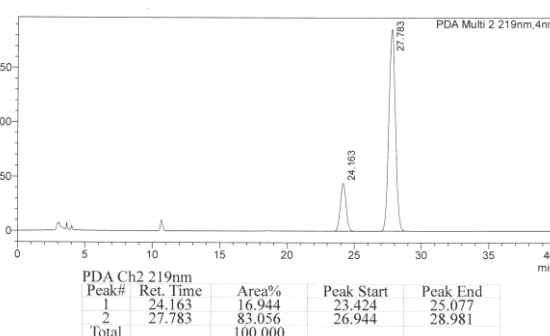

**After recrystallization**

**HPLC Condition:** **Column:** Chiralpak AD-H, Daicel Chemical Industries, Ltd.;  
**Eluent:** Hexanes/IPA (90/10); **Flow rate:** 1.0 mL/min; **Detection:** UV219 nm.

**Racemic standard**

**Enantio-enriched product**

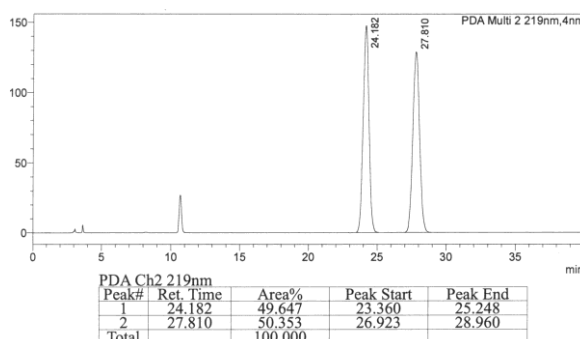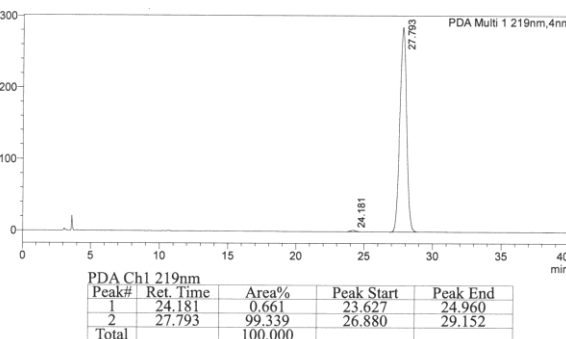

**Table 3, 2b**

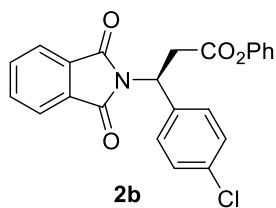

**HPLC Condition:** **Column:** Chiralpak AD-H, Daicel Chemical Industries, Ltd.;  
**Eluent:** Hexanes/IPA (90/10); **Flow rate:** 1.0 mL/min; **Detection:** UV217 nm.

**Racemic standard**

**Enantio-enriched product**

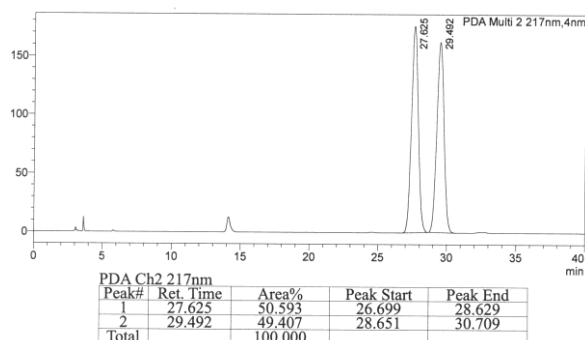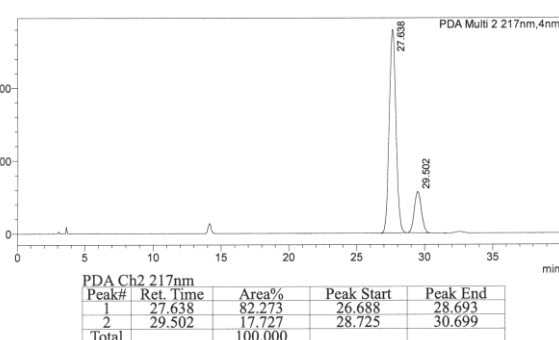

**After recrystallization**

**HPLC Condition:** **Column:** Chiralpak AD-H, Daicel Chemical Industries, Ltd.;  
**Eluent:** Hexanes/IPA (90/10); **Flow rate:** 1.0 mL/min; **Detection:** UV217 nm.

**Racemic standard**

**Enantio-enriched product**

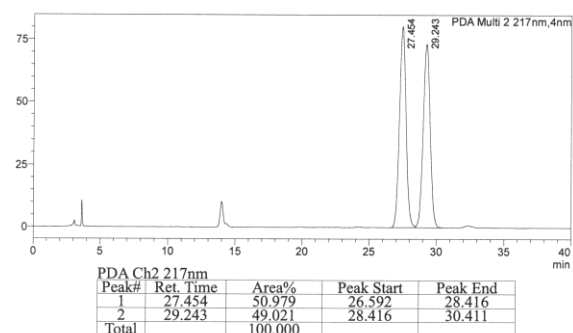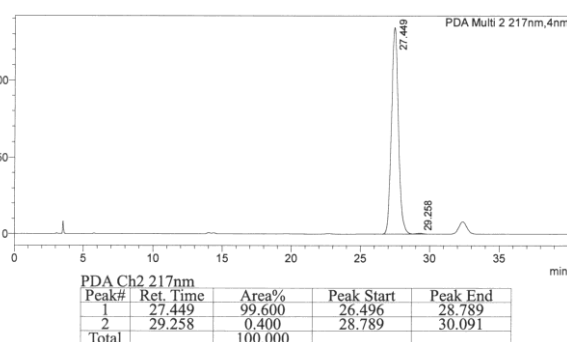

**Table 3, 2c**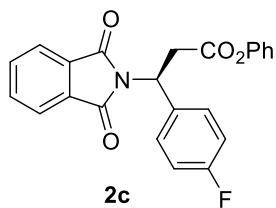

**HPLC Condition:** **Column:** Chiralpak OD-H, Daicel Chemical Industries, Ltd.;  
**Eluent:** Hexanes/IPA (90/10); **Flow rate:** 1.0 mL/min; **Detection:** UV219 nm.

**Racemic standard**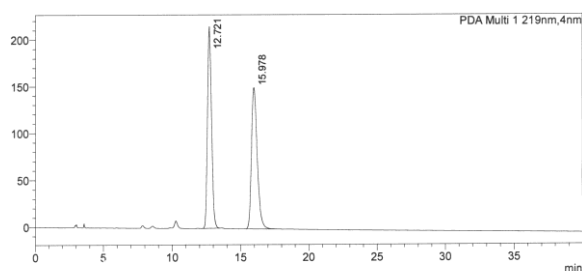

| Peak# | Ret. Time | Area%   | Peak Start | Peak End |
|-------|-----------|---------|------------|----------|
| 1     | 12.721    | 50.057  | 12.171     | 13.493   |
| 2     | 15.978    | 49.943  | 15.264     | 17.675   |
| Total |           | 100.000 |            |          |

**Enantio-enriched product**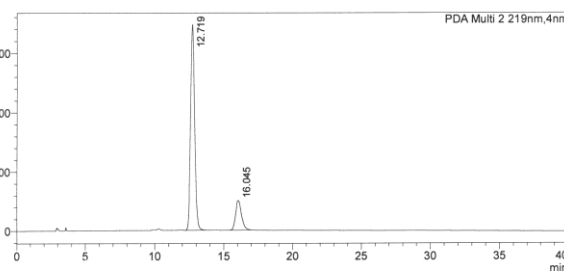

| Peak# | Ret. Time | Area%   | Peak Start | Peak End |
|-------|-----------|---------|------------|----------|
| 1     | 12.719    | 82.764  | 12.224     | 13.813   |
| 2     | 16.045    | 17.236  | 15.349     | 17.195   |
| Total |           | 100.000 |            |          |

**Table 3, 2d**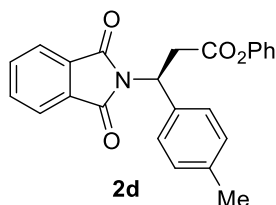

**HPLC Condition:** **Column:** Chiralpak AD-H, Daicel Chemical Industries, Ltd.;  
**Eluent:** Hexanes/IPA (90/10); **Flow rate:** 1.0 mL/min; **Detection:** UV216 nm.

**Racemic standard**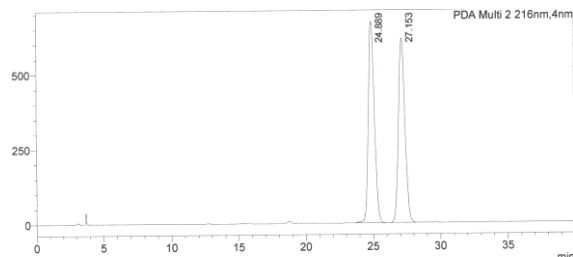

| Peak# | Ret. Time | Area%   | Peak Start | Peak End |
|-------|-----------|---------|------------|----------|
| 1     | 24.889    | 50.321  | 23.563     | 26.176   |
| 2     | 27.153    | 49.679  | 26.272     | 28.629   |
| Total |           | 100.000 |            |          |

**Enantio-enriched product**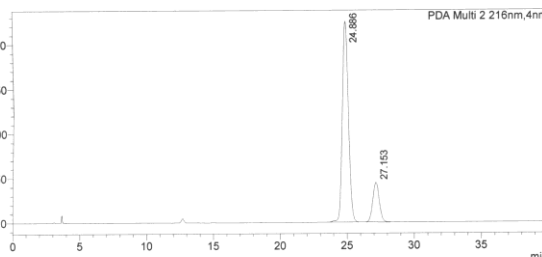

| Peak# | Ret. Time | Area%   | Peak Start | Peak End |
|-------|-----------|---------|------------|----------|
| 1     | 24.886    | 82.633  | 23.499     | 26.187   |
| 2     | 27.153    | 17.367  | 26.304     | 28.299   |
| Total |           | 100.000 |            |          |

**Table 3, 2e**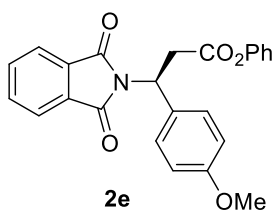

**HPLC Condition:** **Column:** Chiralpak AD-H, Daicel Chemical Industries, Ltd.;  
**Eluent:** Hexanes/IPA (90/10); **Flow rate:** 1.0 mL/min; **Detection:** UV217 nm.

**Racemic standard**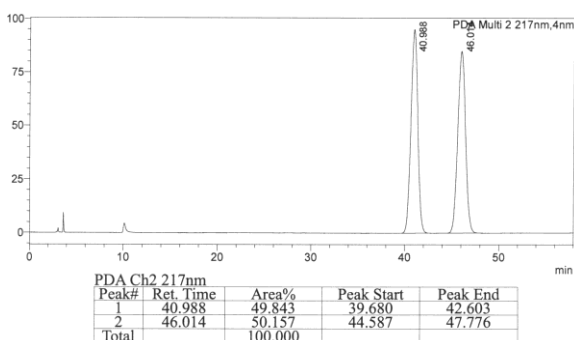**Enantio-enriched product**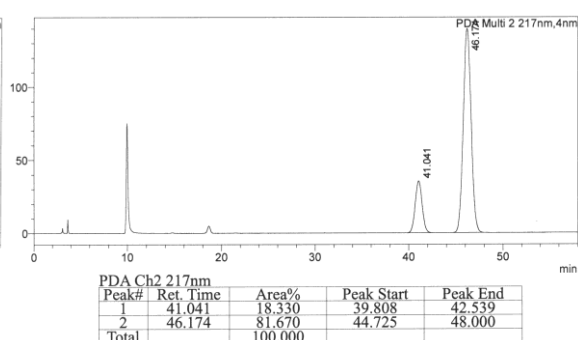**Table 3, 2f**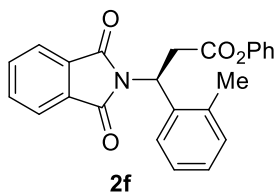

**HPLC Condition:** **Column:** Chiralpak AD-H, Daicel Chemical Industries, Ltd.;  
**Eluent:** Hexanes/IPA (90/10); **Flow rate:** 1.0 mL/min; **Detection:** UV216 nm.

**Racemic standard**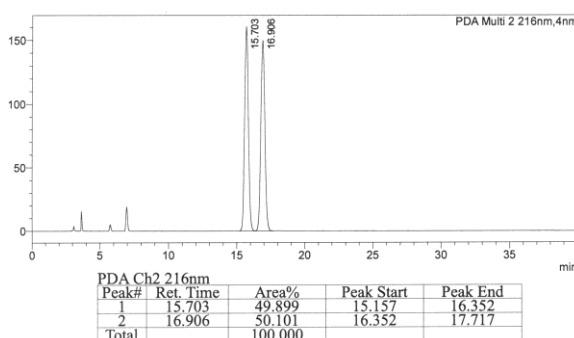**Enantio-enriched product**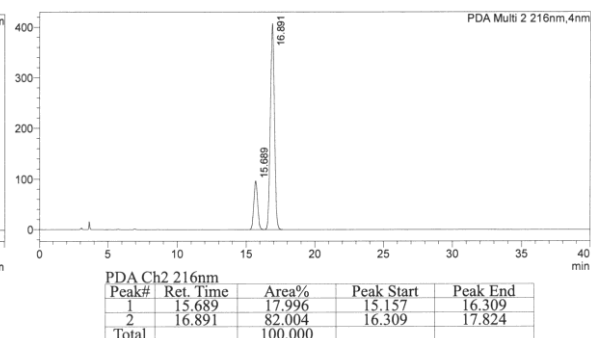

**Table 3, 2g**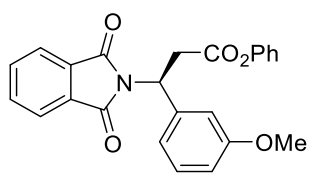**2g**

**HPLC Condition:** **Column:** Chiralpak AD-H, Daicel Chemical Industries, Ltd.;  
**Eluent:** Hexanes/IPA (90/10); **Flow rate:** 1.0 mL/min; **Detection:** UV219 nm.

**Racemic standard**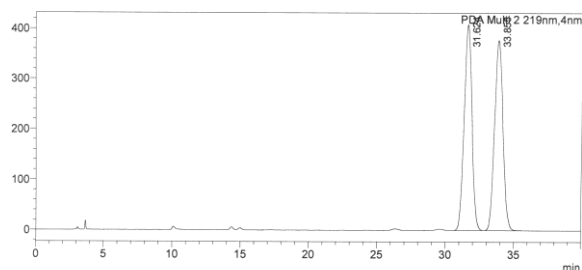

| PDA Ch2 219nm |           |         |            |          |
|---------------|-----------|---------|------------|----------|
| Peak#         | Ret. Time | Area%   | Peak Start | Peak End |
| 1             | 31.624    | 50.051  | 30.517     | 32.821   |
| 2             | 33.855    | 49.949  | 32.853     | 36.011   |
| Total         |           | 100.000 |            |          |

**Enantio-enriched product**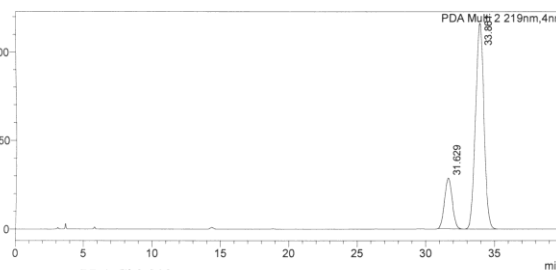

| PDA Ch2 219nm |           |         |            |          |
|---------------|-----------|---------|------------|----------|
| Peak#         | Ret. Time | Area%   | Peak Start | Peak End |
| 1             | 31.629    | 18.280  | 30.859     | 32.704   |
| 2             | 33.861    | 81.720  | 32.768     | 35.573   |
| Total         |           | 100.000 |            |          |

**Table 3, 2h**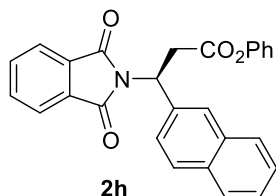**2h**

**HPLC Condition:** **Column:** Chiralpak AD-H, Daicel Chemical Industries, Ltd.;  
**Eluent:** Hexanes/IPA (90/10); **Flow rate:** 1.0 mL/min; **Detection:** UV227 nm.

**Racemic standard**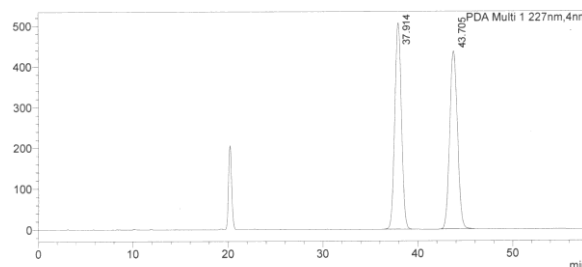

| PDA Ch1 227nm |           |         |            |          |
|---------------|-----------|---------|------------|----------|
| Peak#         | Ret. Time | Area%   | Peak Start | Peak End |
| 1             | 37.914    | 49.994  | 36.512     | 39.755   |
| 2             | 43.705    | 50.006  | 42.453     | 46.261   |
| Total         |           | 100.000 |            |          |

**Enantio-enriched product**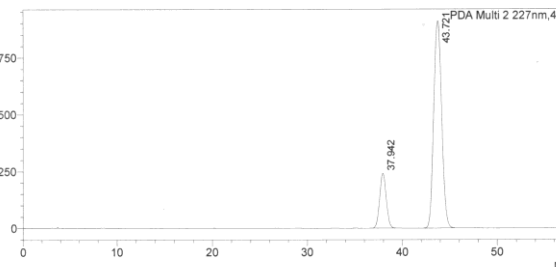

| PDA Ch2 227nm |           |         |            |          |
|---------------|-----------|---------|------------|----------|
| Peak#         | Ret. Time | Area%   | Peak Start | Peak End |
| 1             | 37.942    | 18.057  | 36.597     | 39.915   |
| 2             | 43.721    | 81.943  | 42.165     | 45.920   |
| Total         |           | 100.000 |            |          |

**Table 3, 2i**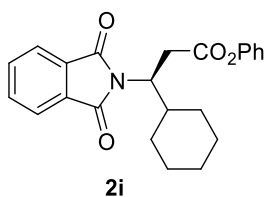

**HPLC Condition:** Column: Chiralpak AD-H, Daicel Chemical Industries, Ltd.;  
**Eluent:** Hexanes/IPA (90/10); **Flow rate:** 1.0 mL/min; **Detection:** UV216 nm.

**Racemic standard**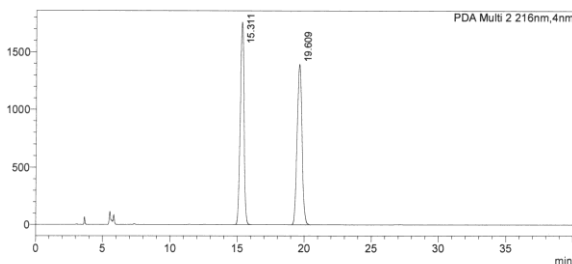

| PDA Ch2 216nm |           |         |            |          |
|---------------|-----------|---------|------------|----------|
| Peak#         | Ret. Time | Area%   | Peak Start | Peak End |
| 1             | 15.311    | 49.490  | 14.805     | 16.341   |
| 2             | 19.609    | 50.510  | 19.029     | 20.661   |
| Total         |           | 100.000 |            |          |

**Enantio-enriched product**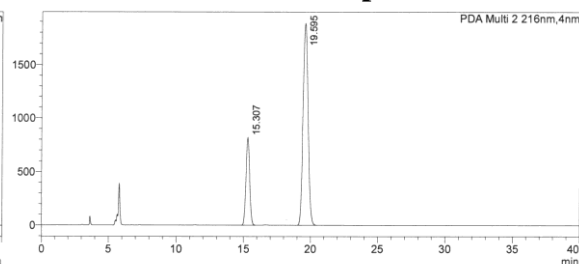

| PDA Ch2 216nm |           |         |            |          |
|---------------|-----------|---------|------------|----------|
| Peak#         | Ret. Time | Area%   | Peak Start | Peak End |
| 1             | 15.307    | 24.030  | 14.869     | 16.128   |
| 2             | 19.595    | 75.970  | 18.880     | 21.056   |
| Total         |           | 100.000 |            |          |

**Table 3, 2j**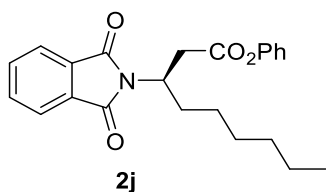

**HPLC Condition:** Column: Chiralpak AD-H, Daicel Chemical Industries, Ltd.;  
**Eluent:** Hexanes/IPA (90/10); **Flow rate:** 1.0 mL/min; **Detection:** UV215 nm.

**Racemic standard**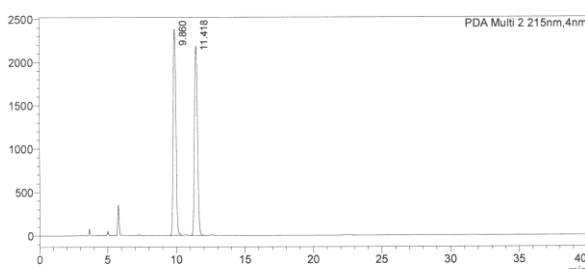

| PDA Ch2 215nm |           |         |            |          |
|---------------|-----------|---------|------------|----------|
| Peak#         | Ret. Time | Area%   | Peak Start | Peak End |
| 1             | 9.860     | 49.289  | 9.536      | 10.464   |
| 2             | 11.418    | 50.711  | 11.040     | 12.075   |
| Total         |           | 100.000 |            |          |

**Enantio-enriched product**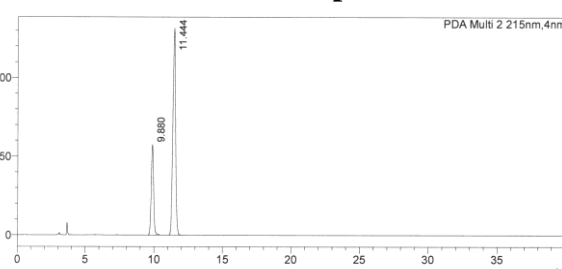

| PDA Ch2 215nm |           |         |            |          |
|---------------|-----------|---------|------------|----------|
| Peak#         | Ret. Time | Area%   | Peak Start | Peak End |
| 1             | 9.880     | 27.556  | 9.568      | 10.837   |
| 2             | 11.444    | 72.444  | 11.019     | 12.224   |
| Total         |           | 100.000 |            |          |

### Scheme 4, product 4

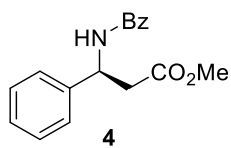

**HPLC Condition:** Column: Chiralpak OD-H, Daicel Chemical Industries, Ltd.;  
**Eluent:** Hexanes/IPA (90/10); **Flow rate:** 1.0 mL/min; **Detection:** UV 230 nm.

#### Racemic standard

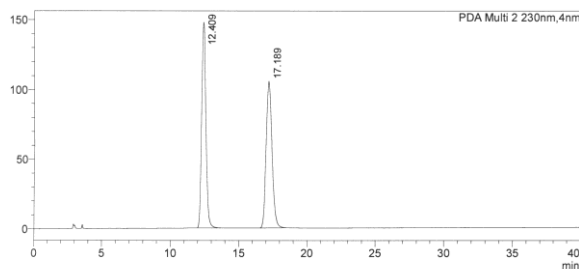

| PDA Ch2 230nm |           |         |            |          |
|---------------|-----------|---------|------------|----------|
| Peak#         | Ret. Time | Area%   | Peak Start | Peak End |
| 1             | 12.409    | 49.988  | 11.936     | 13.771   |
| 2             | 17.189    | 50.012  | 16.469     | 18.699   |
| Total         |           | 100.000 |            |          |

#### Enantio-enriched product

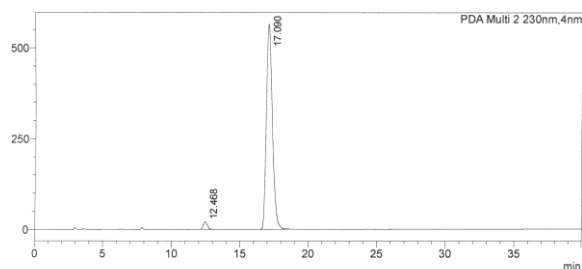

| PDA Ch2 230nm |           |         |            |          |
|---------------|-----------|---------|------------|----------|
| Peak#         | Ret. Time | Area%   | Peak Start | Peak End |
| 1             | 12.468    | 2.540   | 12.021     | 13.237   |
| 2             | 17.090    | 97.460  | 16.395     | 18.965   |
| Total         |           | 100.000 |            |          |

NMR spectra

$^1\text{H}$  NMR Spectrum of **S2** ( $\text{CDCl}_3$ , 400 MHz)

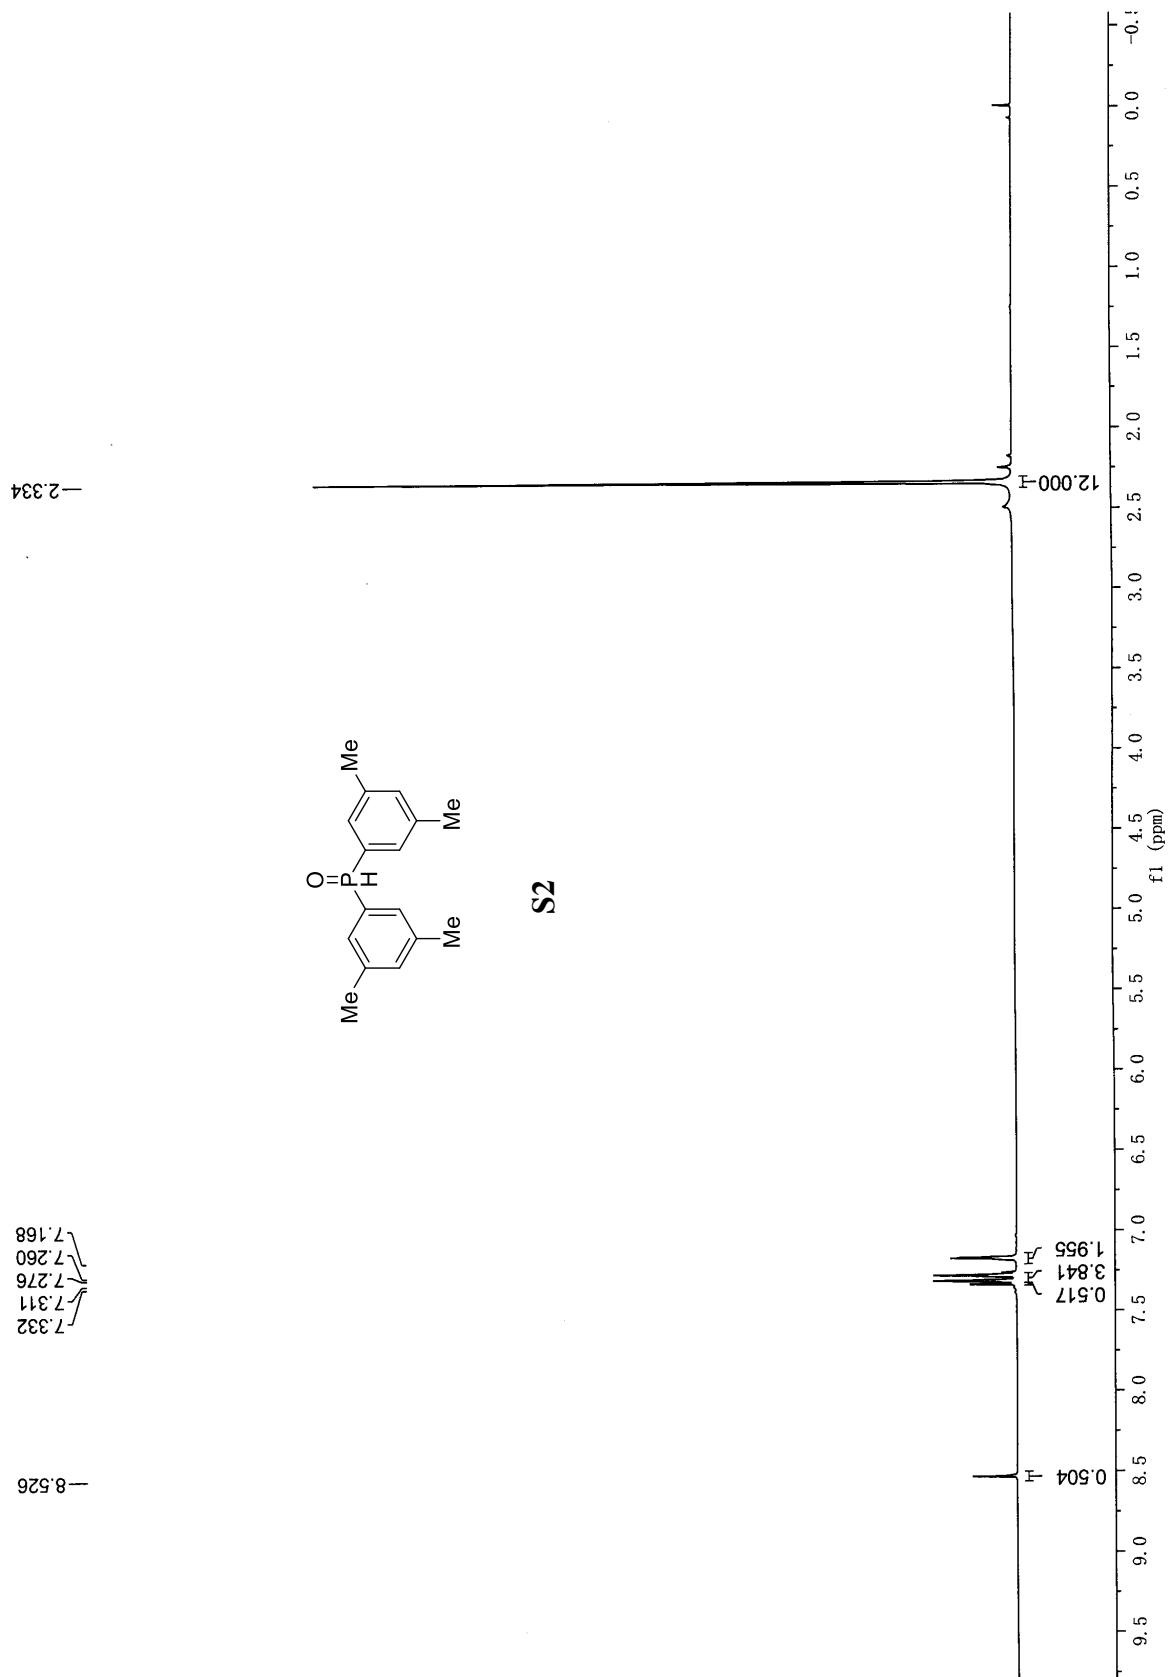



<sup>13</sup>C NMR Spectrum of **S2** (CDCl<sub>3</sub>, 100 MHz)

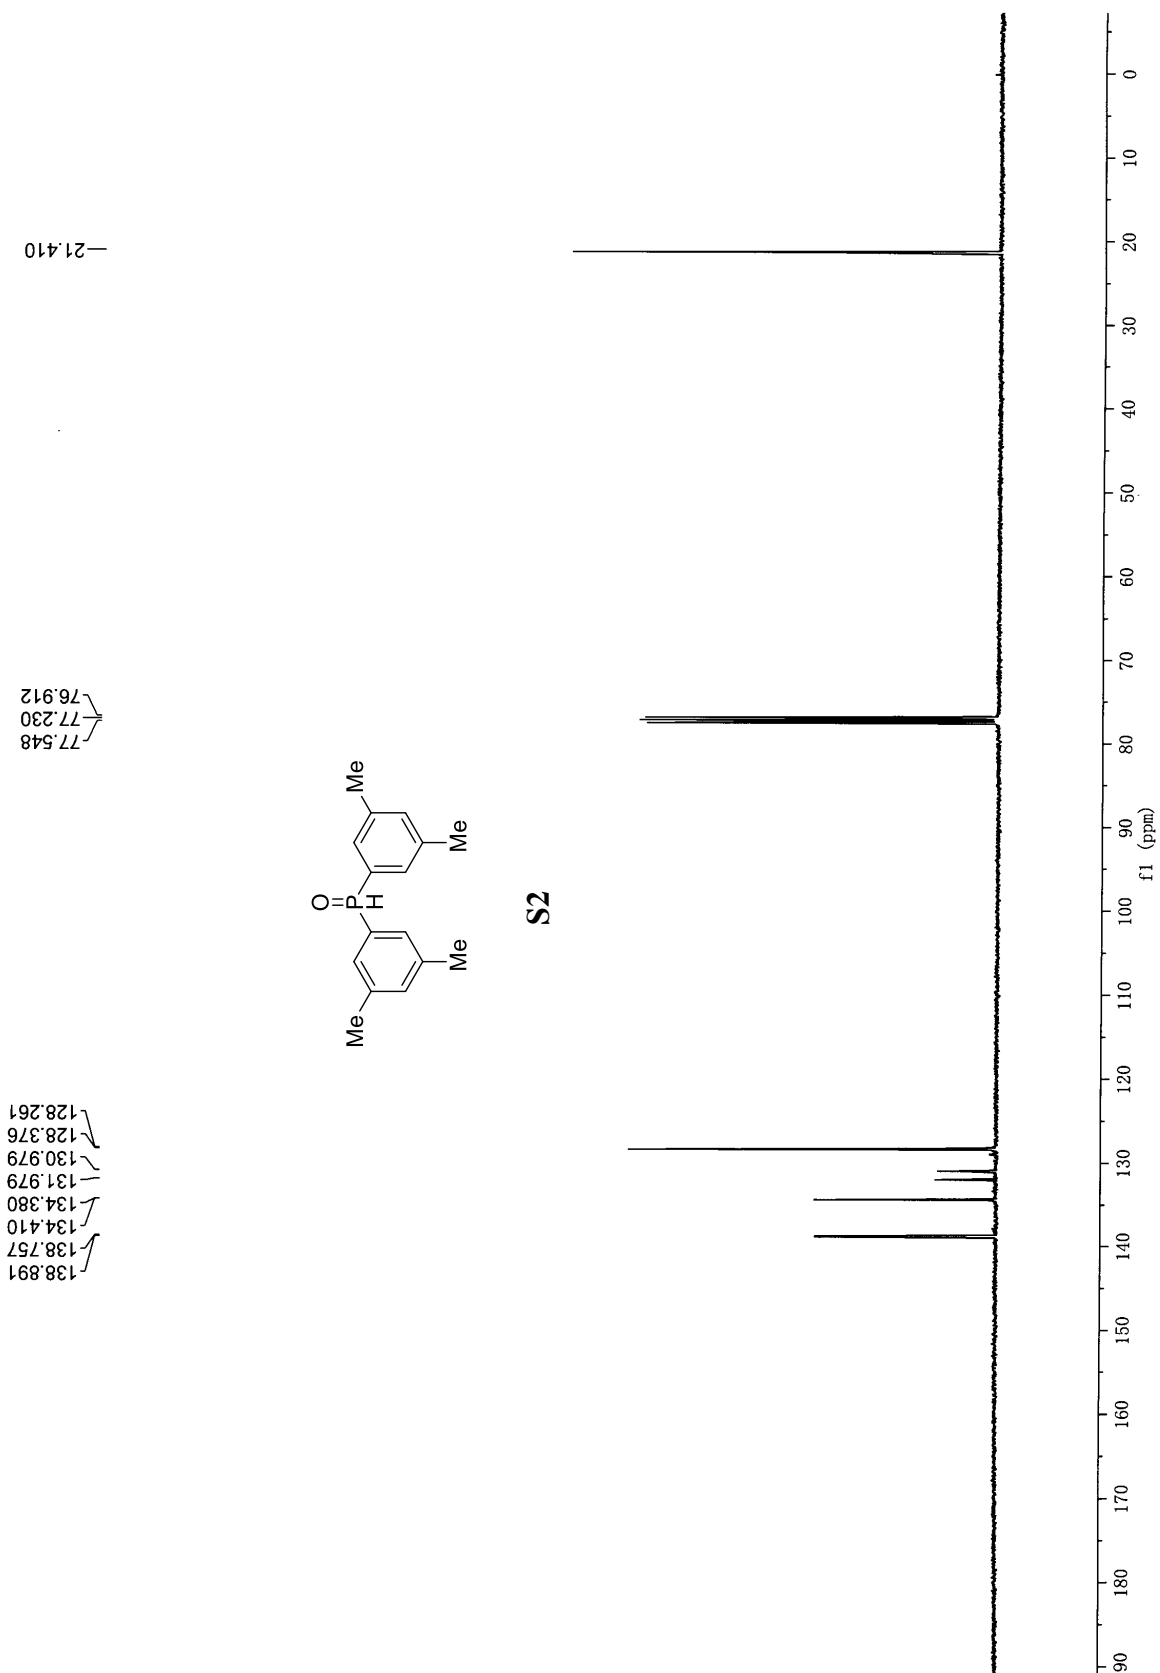

<sup>31</sup>P NMR Spectrum of **S2** (CDCl<sub>3</sub>, 162 MHz)

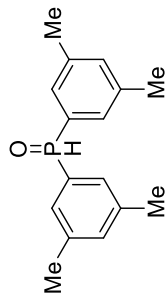

**S2**

-22.841

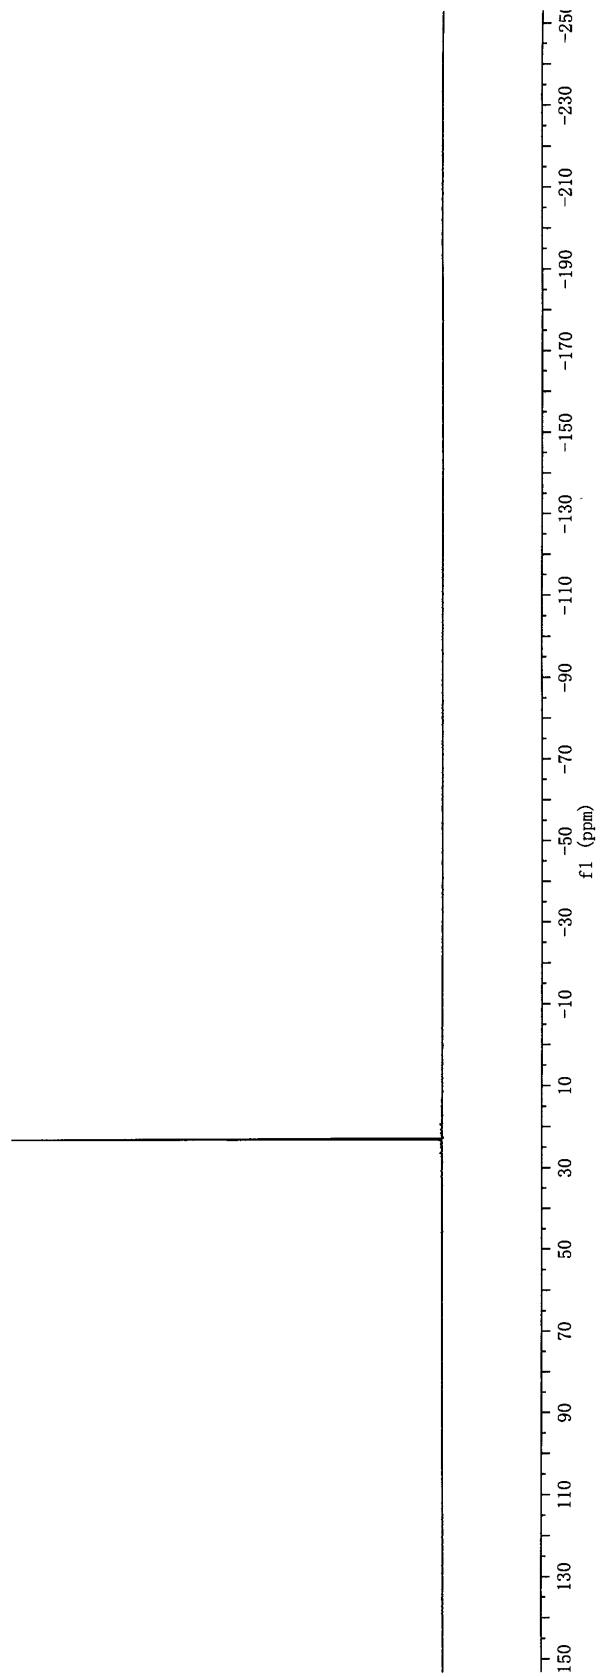

<sup>1</sup>H NMR Spectrum of S3 (CDCl<sub>3</sub>, 400 MHz)

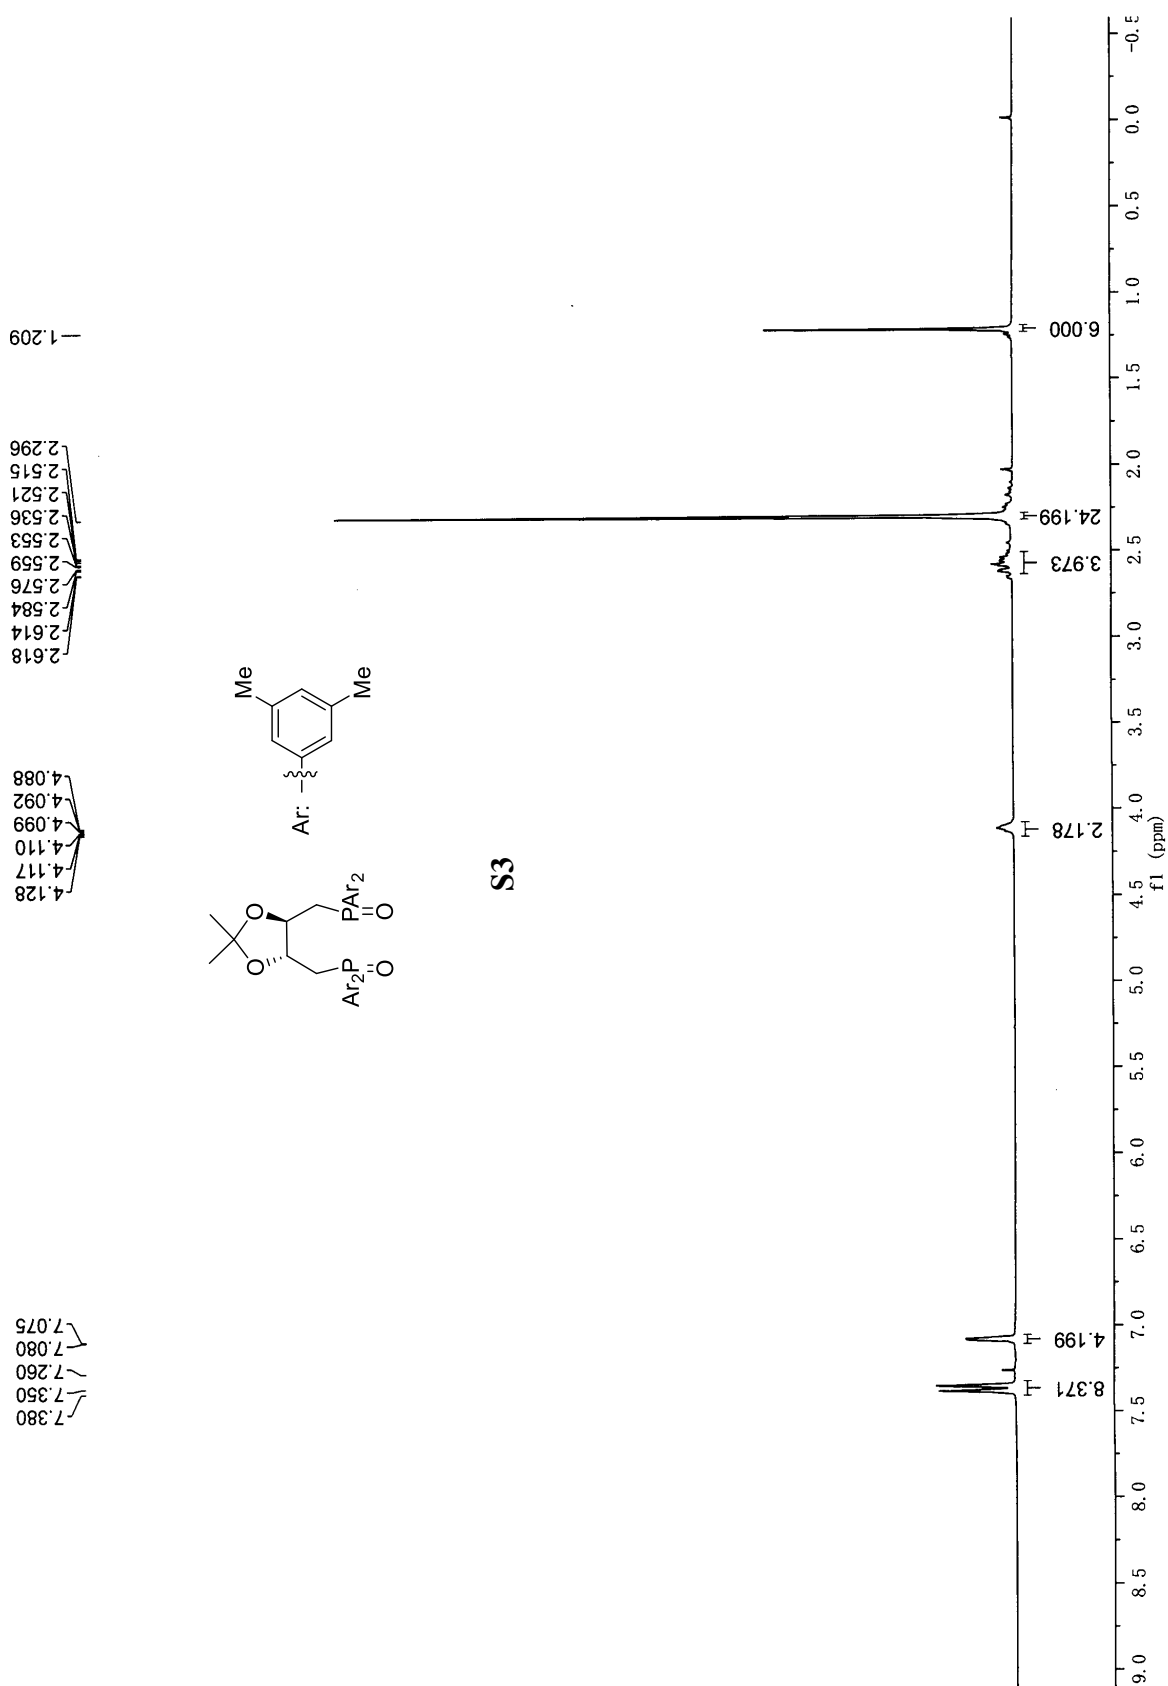

<sup>13</sup>C NMR Spectrum of S3 (CDCl<sub>3</sub>, 100 MHz)

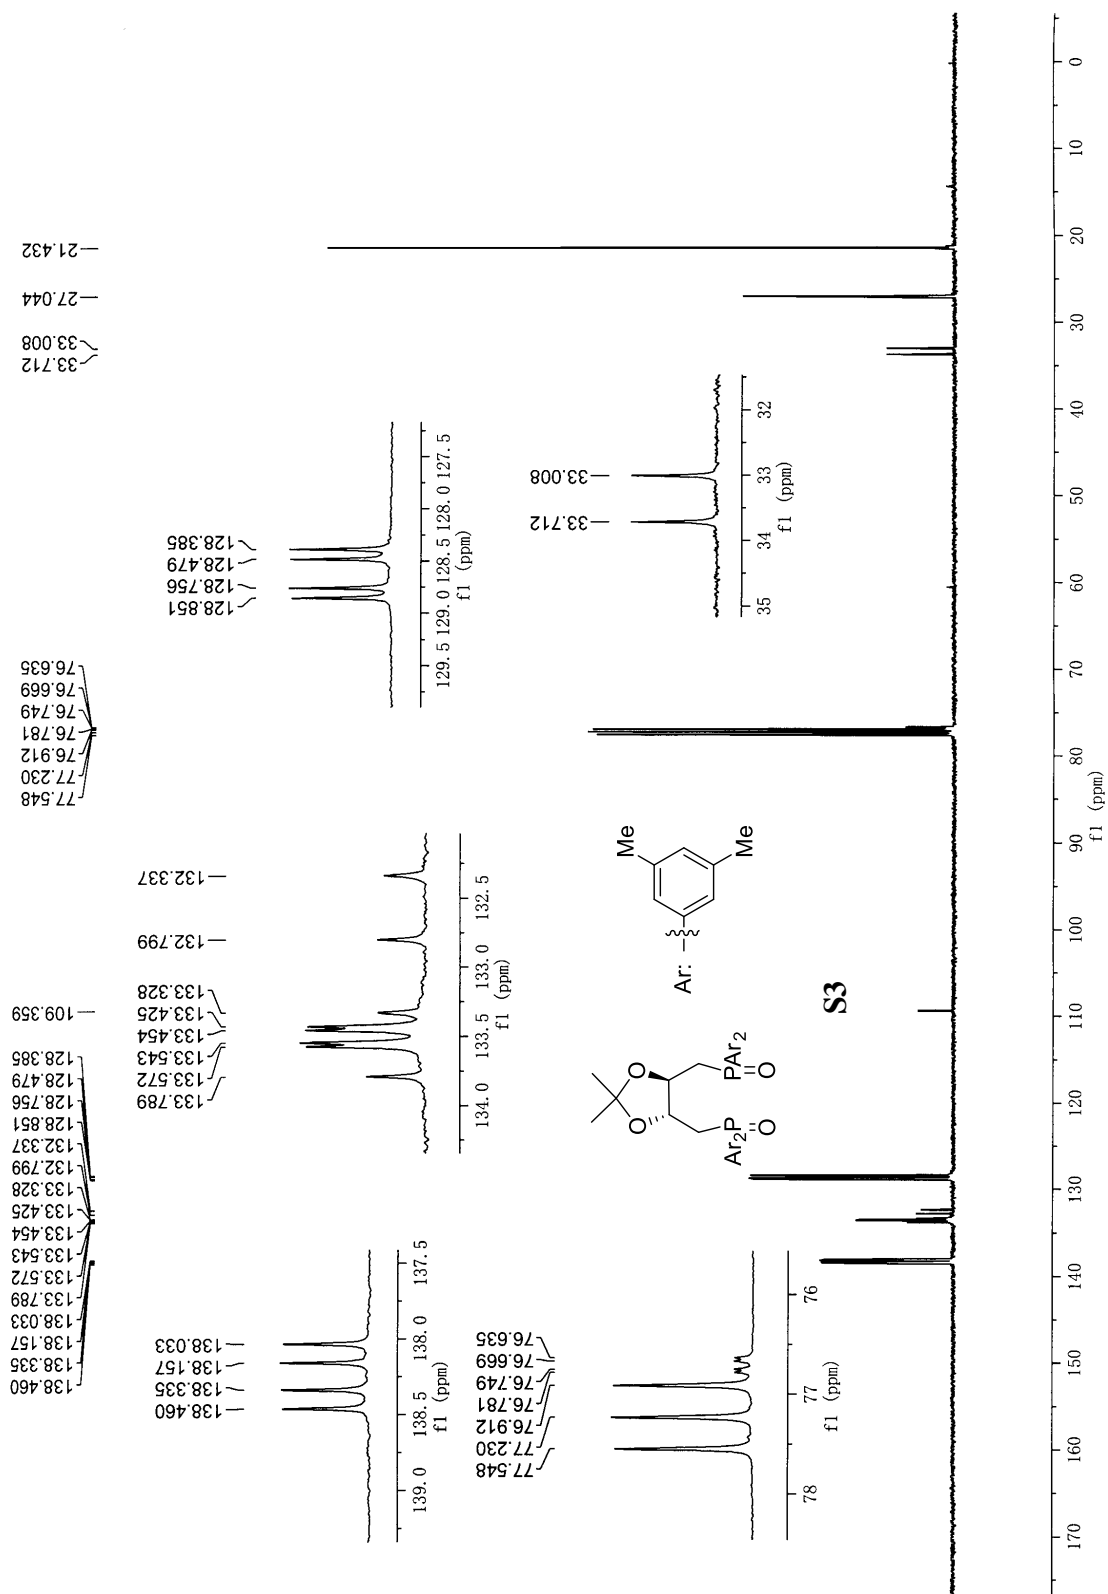

$^{31}\text{P}$  NMR Spectrum of **S3** ( $\text{CDCl}_3$ , 162 MHz)

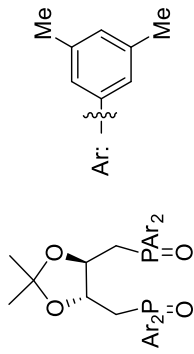

**S3**

—29.848

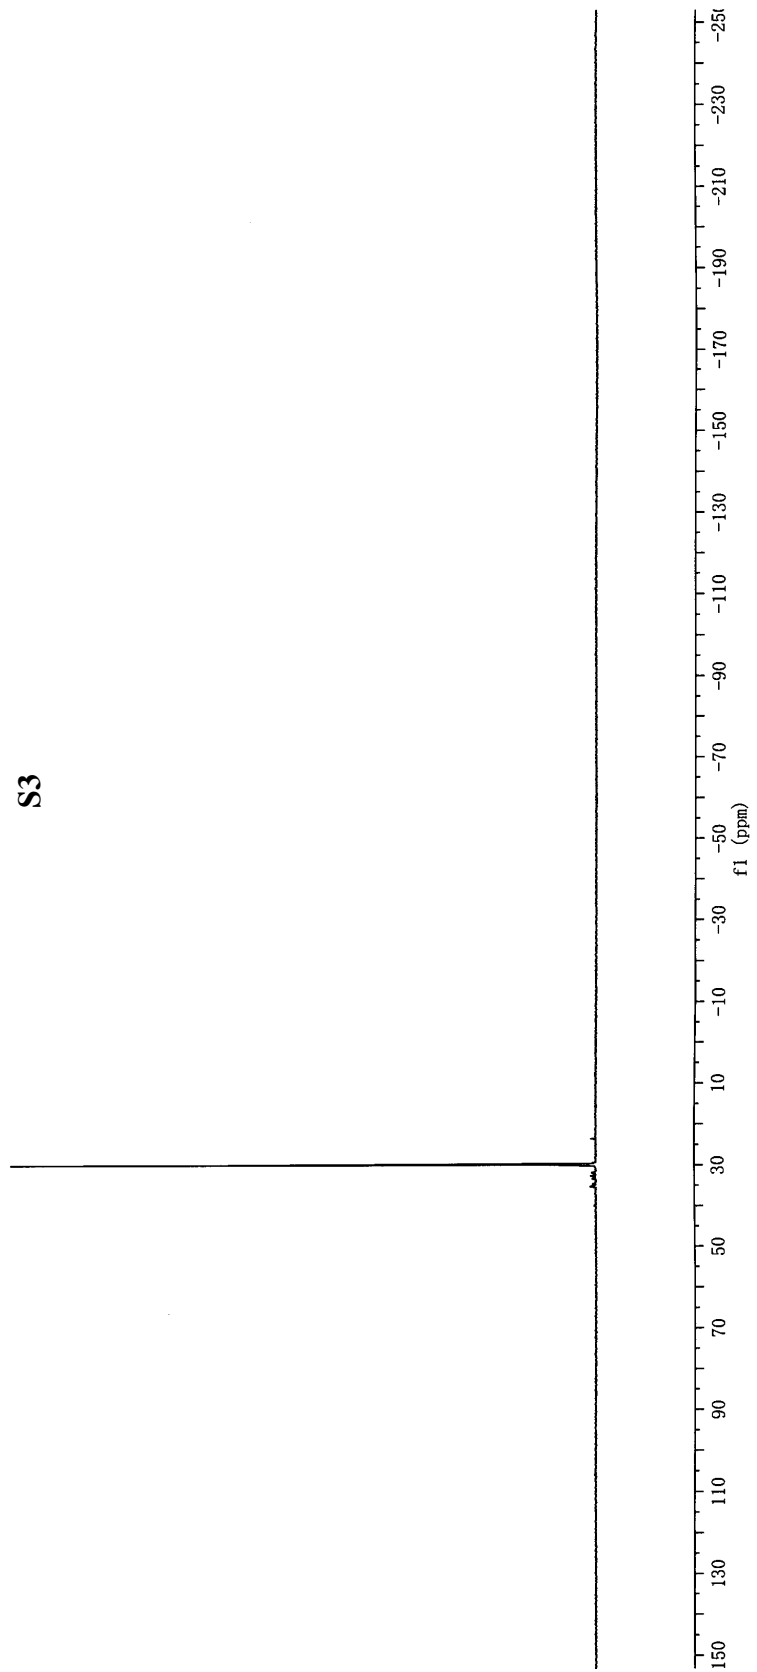

<sup>1</sup>H NMR Spectrum of **L15** (CDCl<sub>3</sub>, 400 MHz)

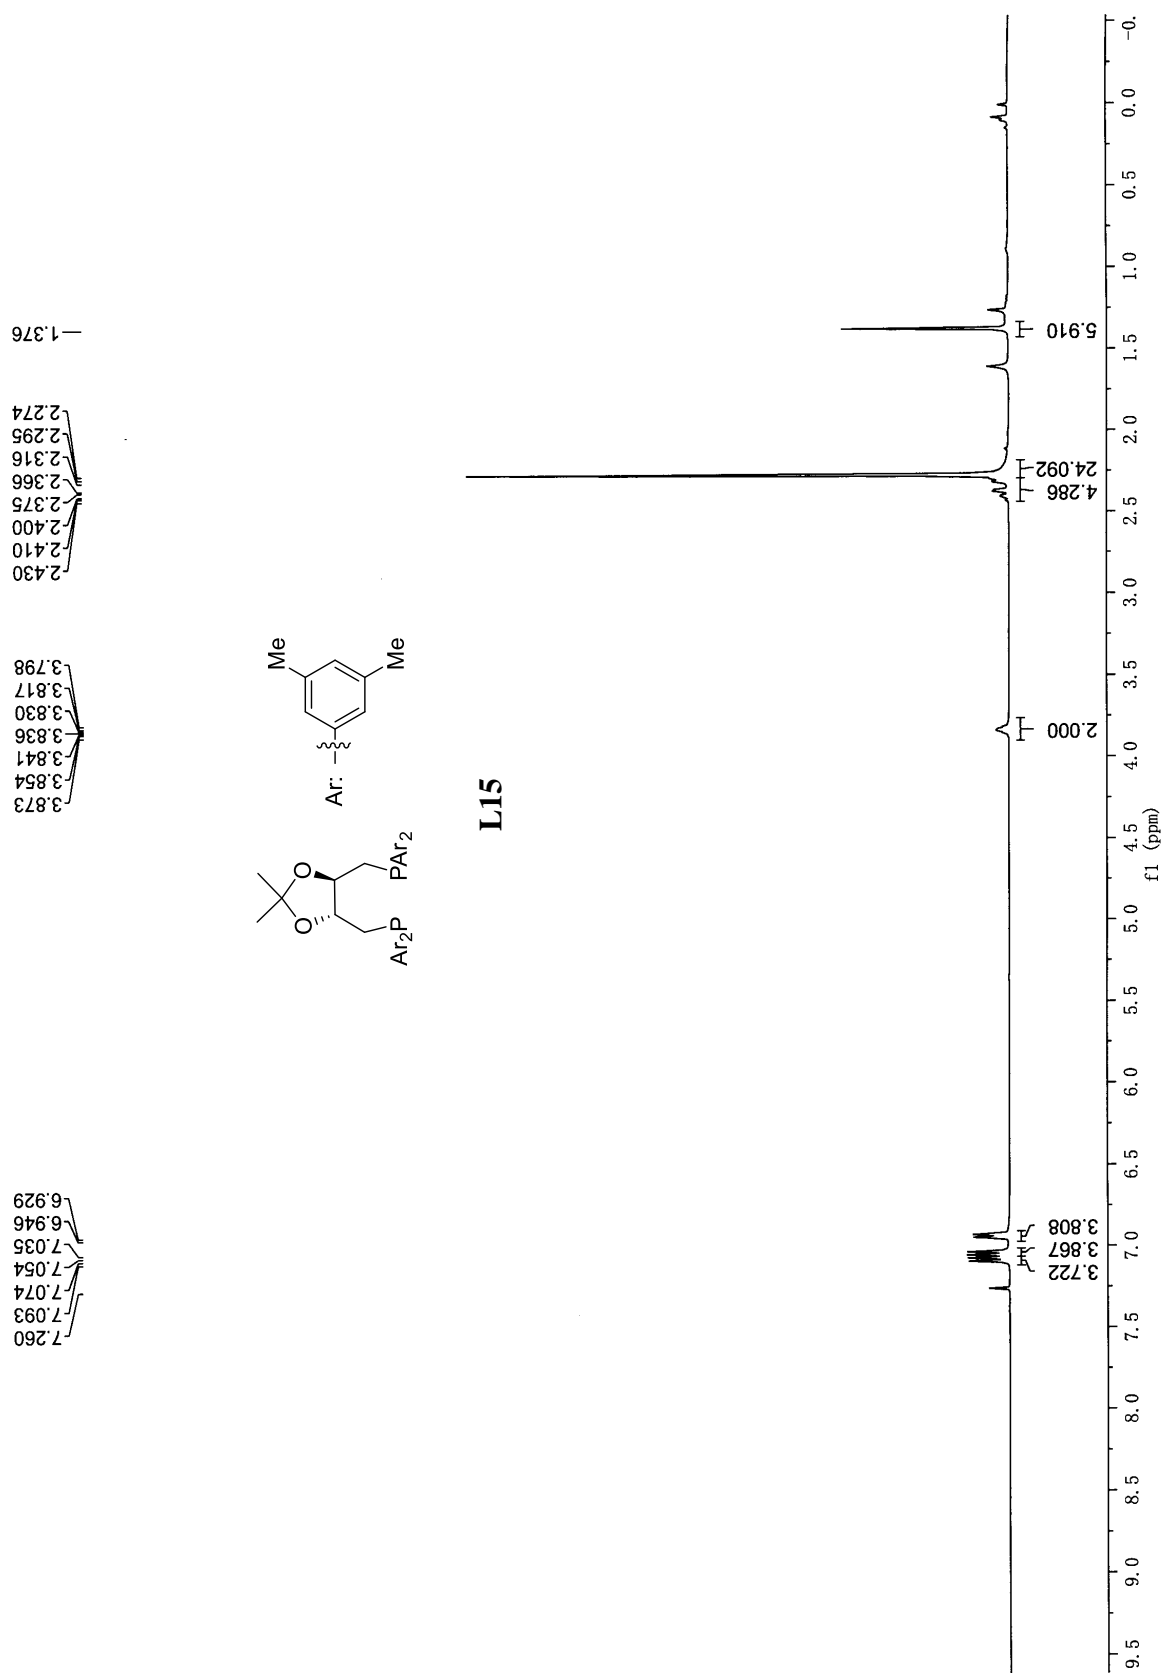

<sup>13</sup>C NMR Spectrum of **L15** (CDCl<sub>3</sub>, 100 MHz)

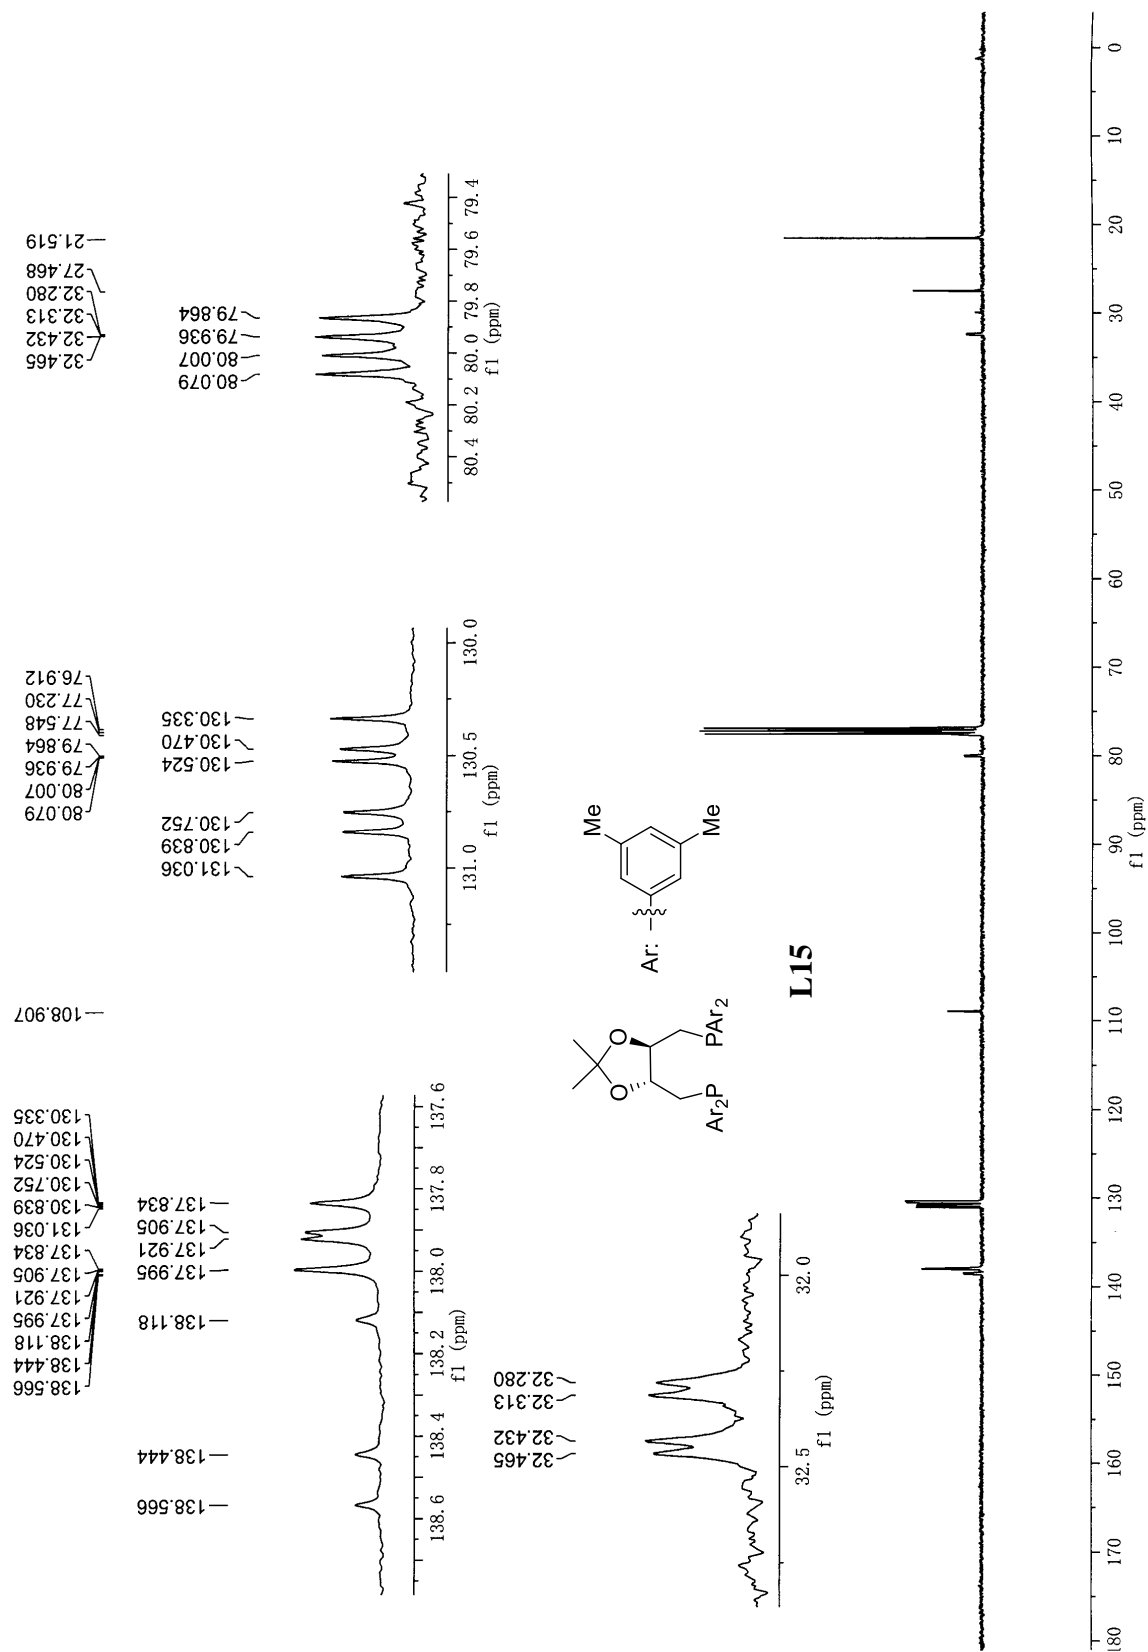

<sup>31</sup>P NMR Spectrum of **L15** (CDCl<sub>3</sub>, 162 MHz)

—23.810

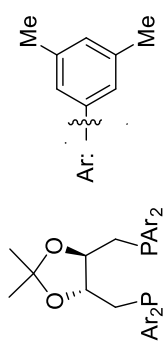

**L15**

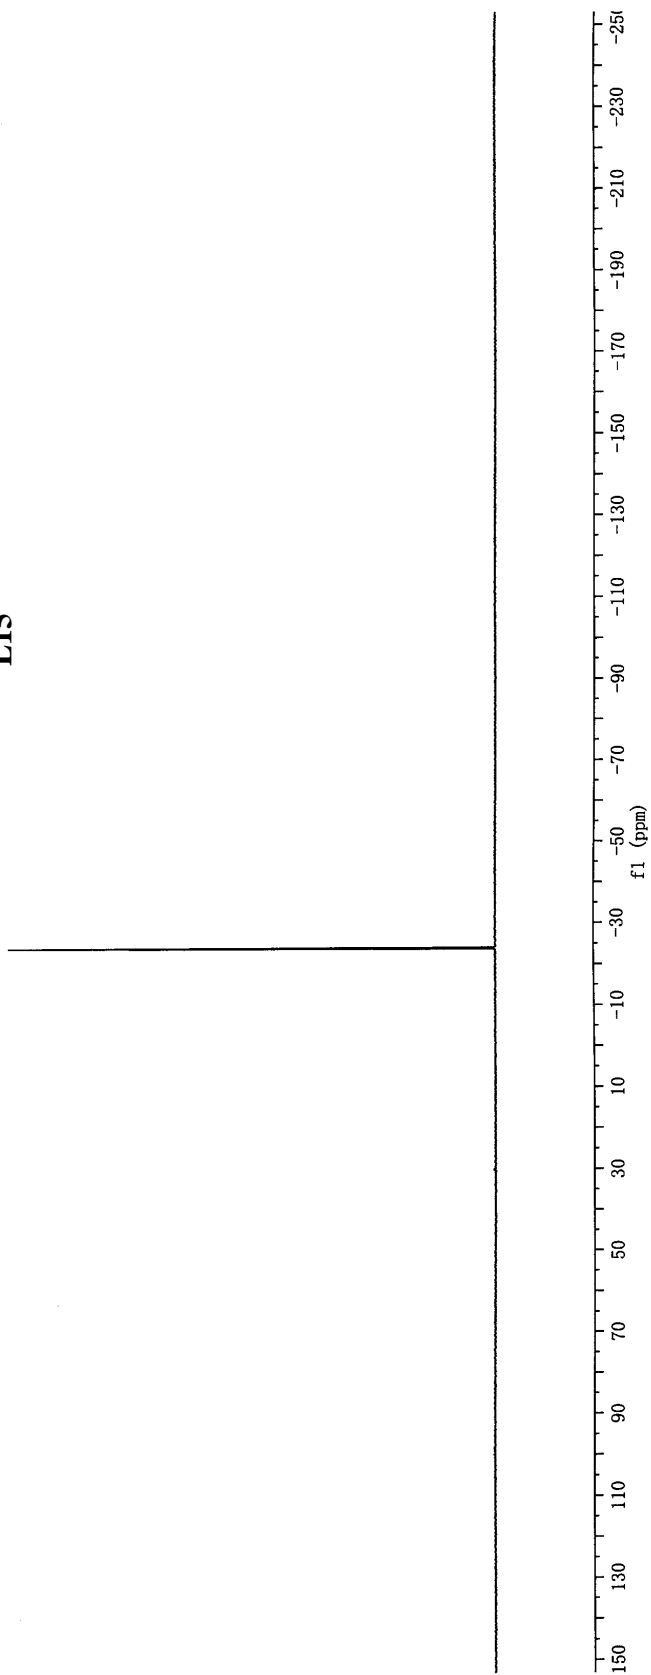



<sup>1</sup>H NMR Spectrum of **2a** (CDCl<sub>3</sub>, 400 MHz)

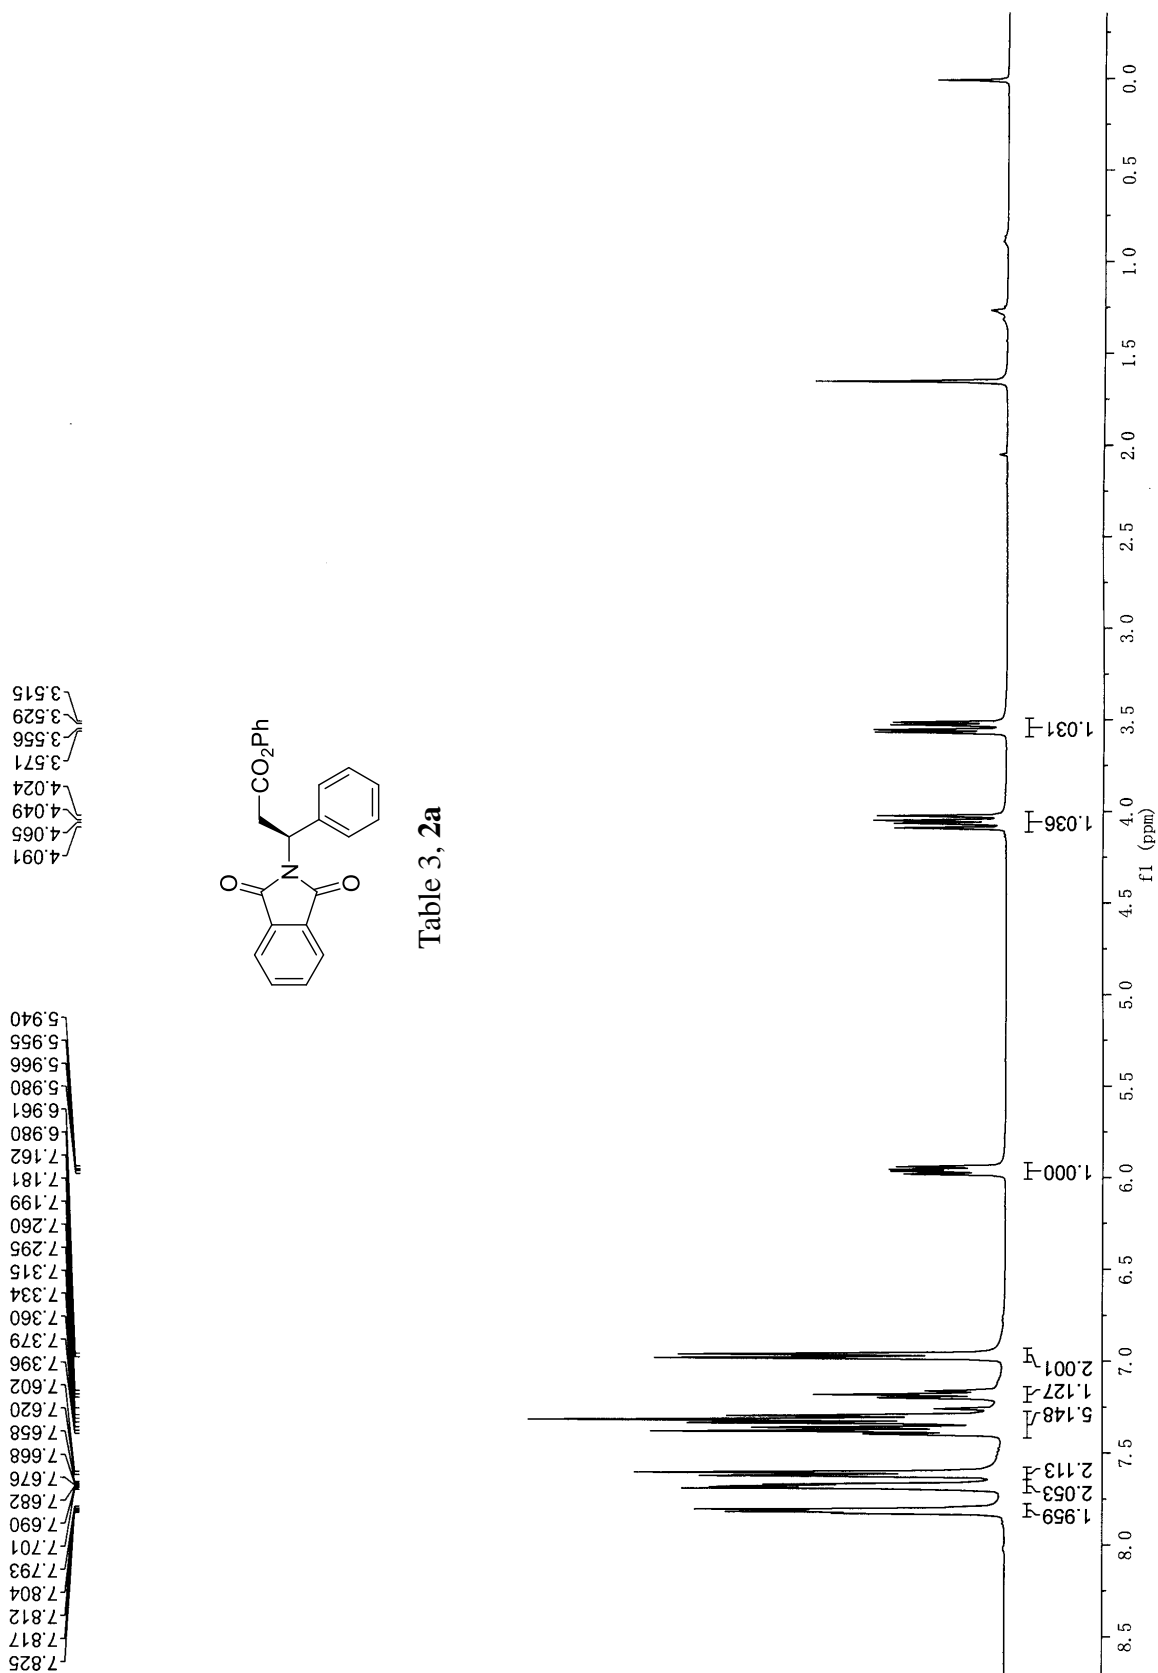

<sup>13</sup>C NMR Spectrum of **2a** (CDCl<sub>3</sub>, 100 MHz)

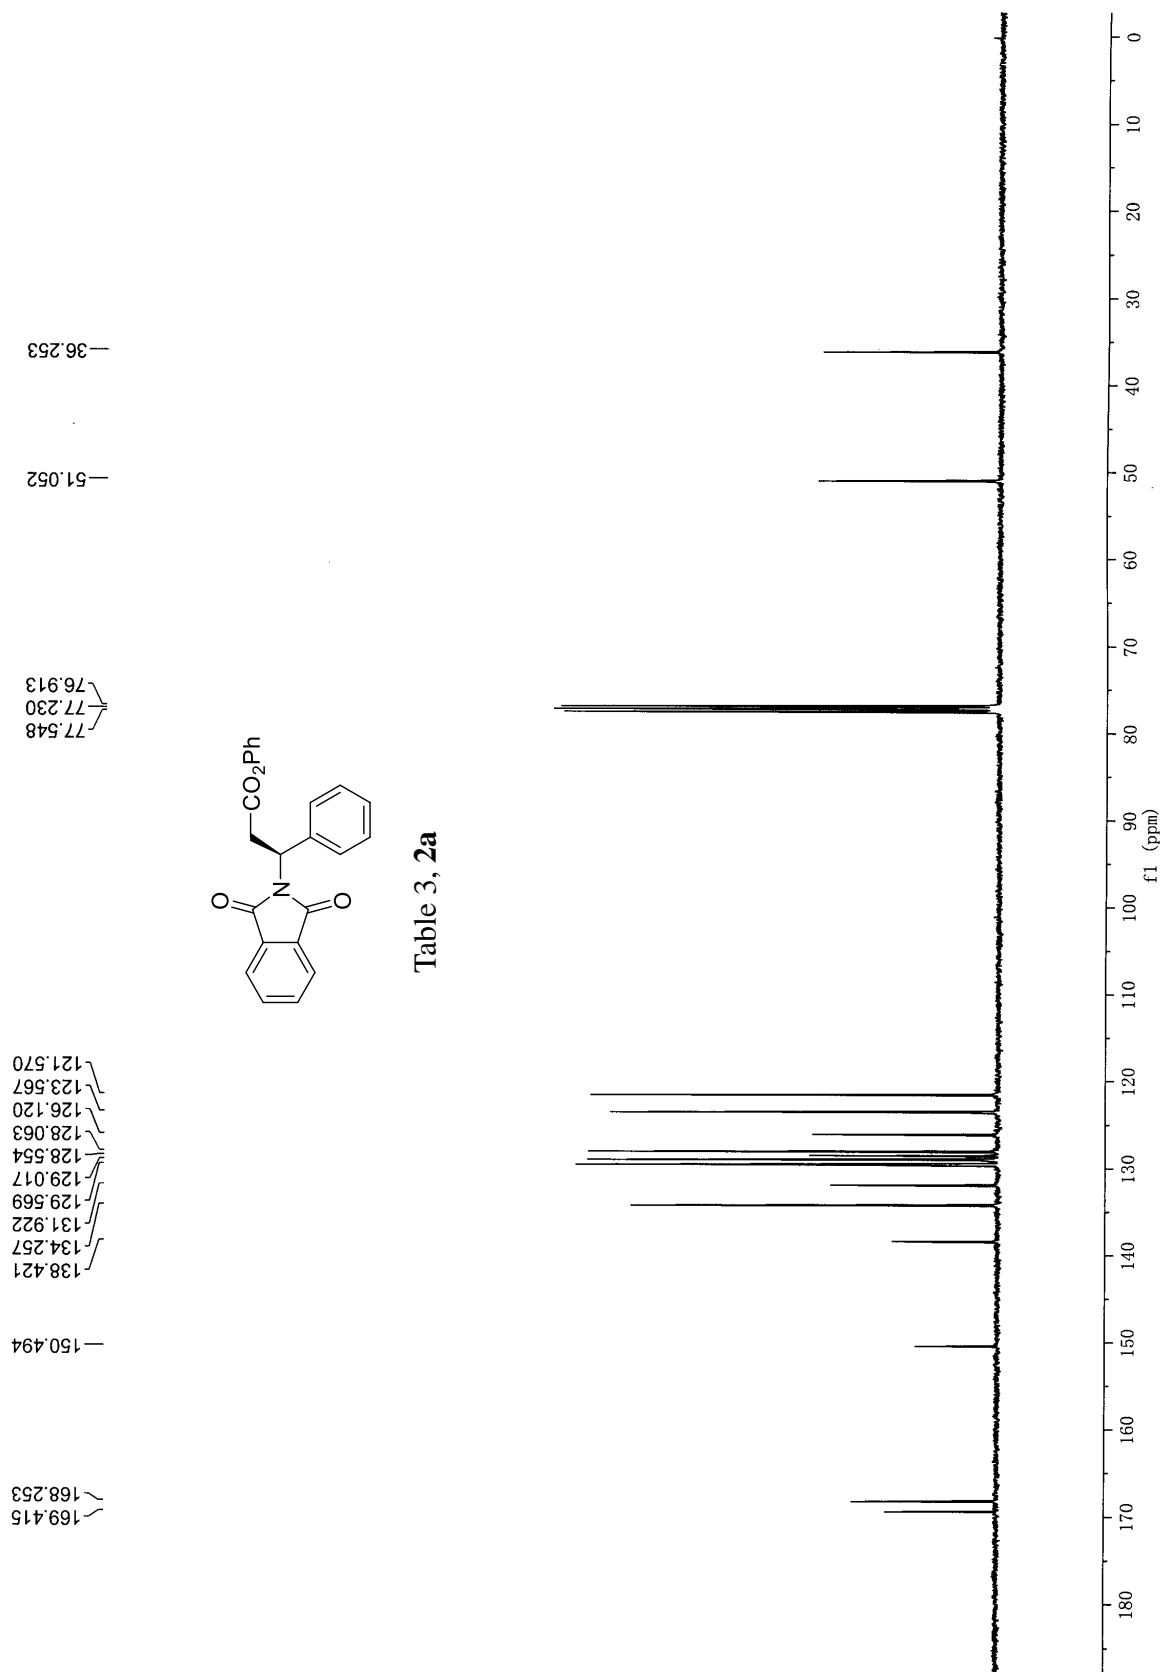

Table 3, **2a**

<sup>1</sup>H NMR Spectrum of **2b** (CDCl<sub>3</sub>, 400 MHz)

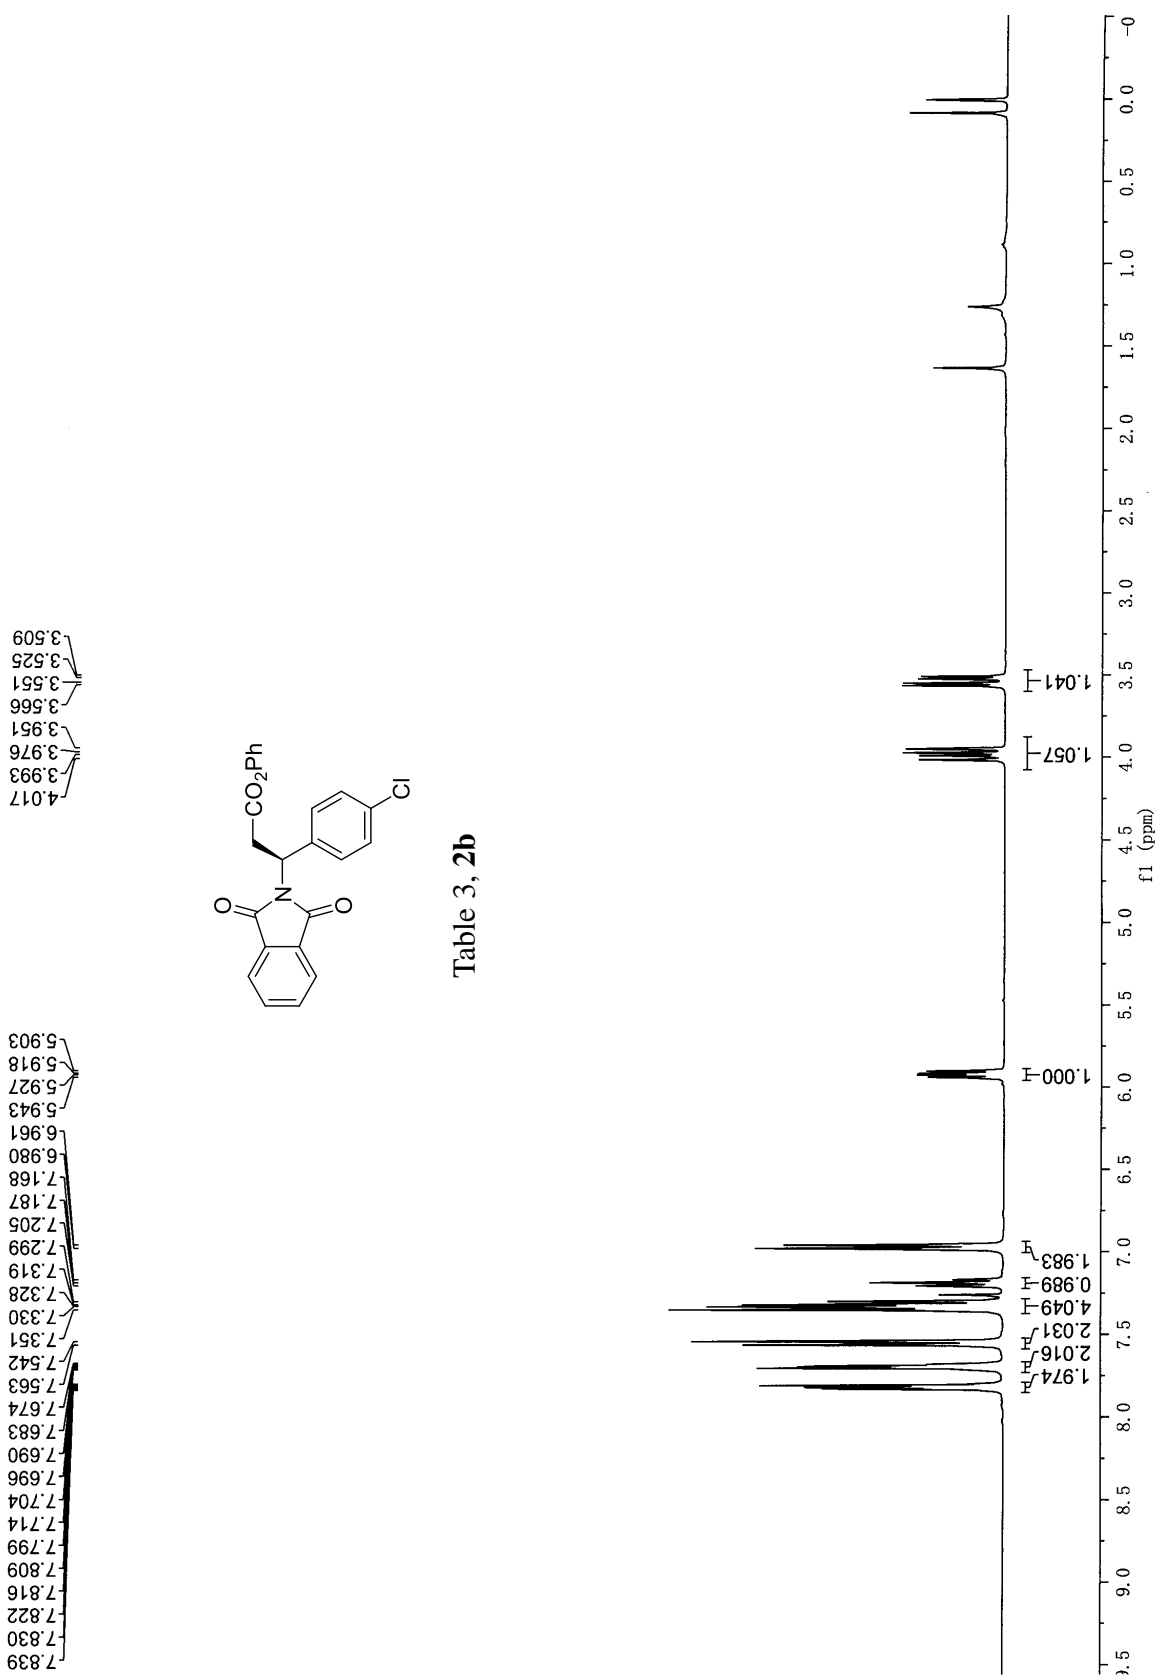

<sup>13</sup>C NMR Spectrum of **2b** (CDCl<sub>3</sub>, 100 MHz)

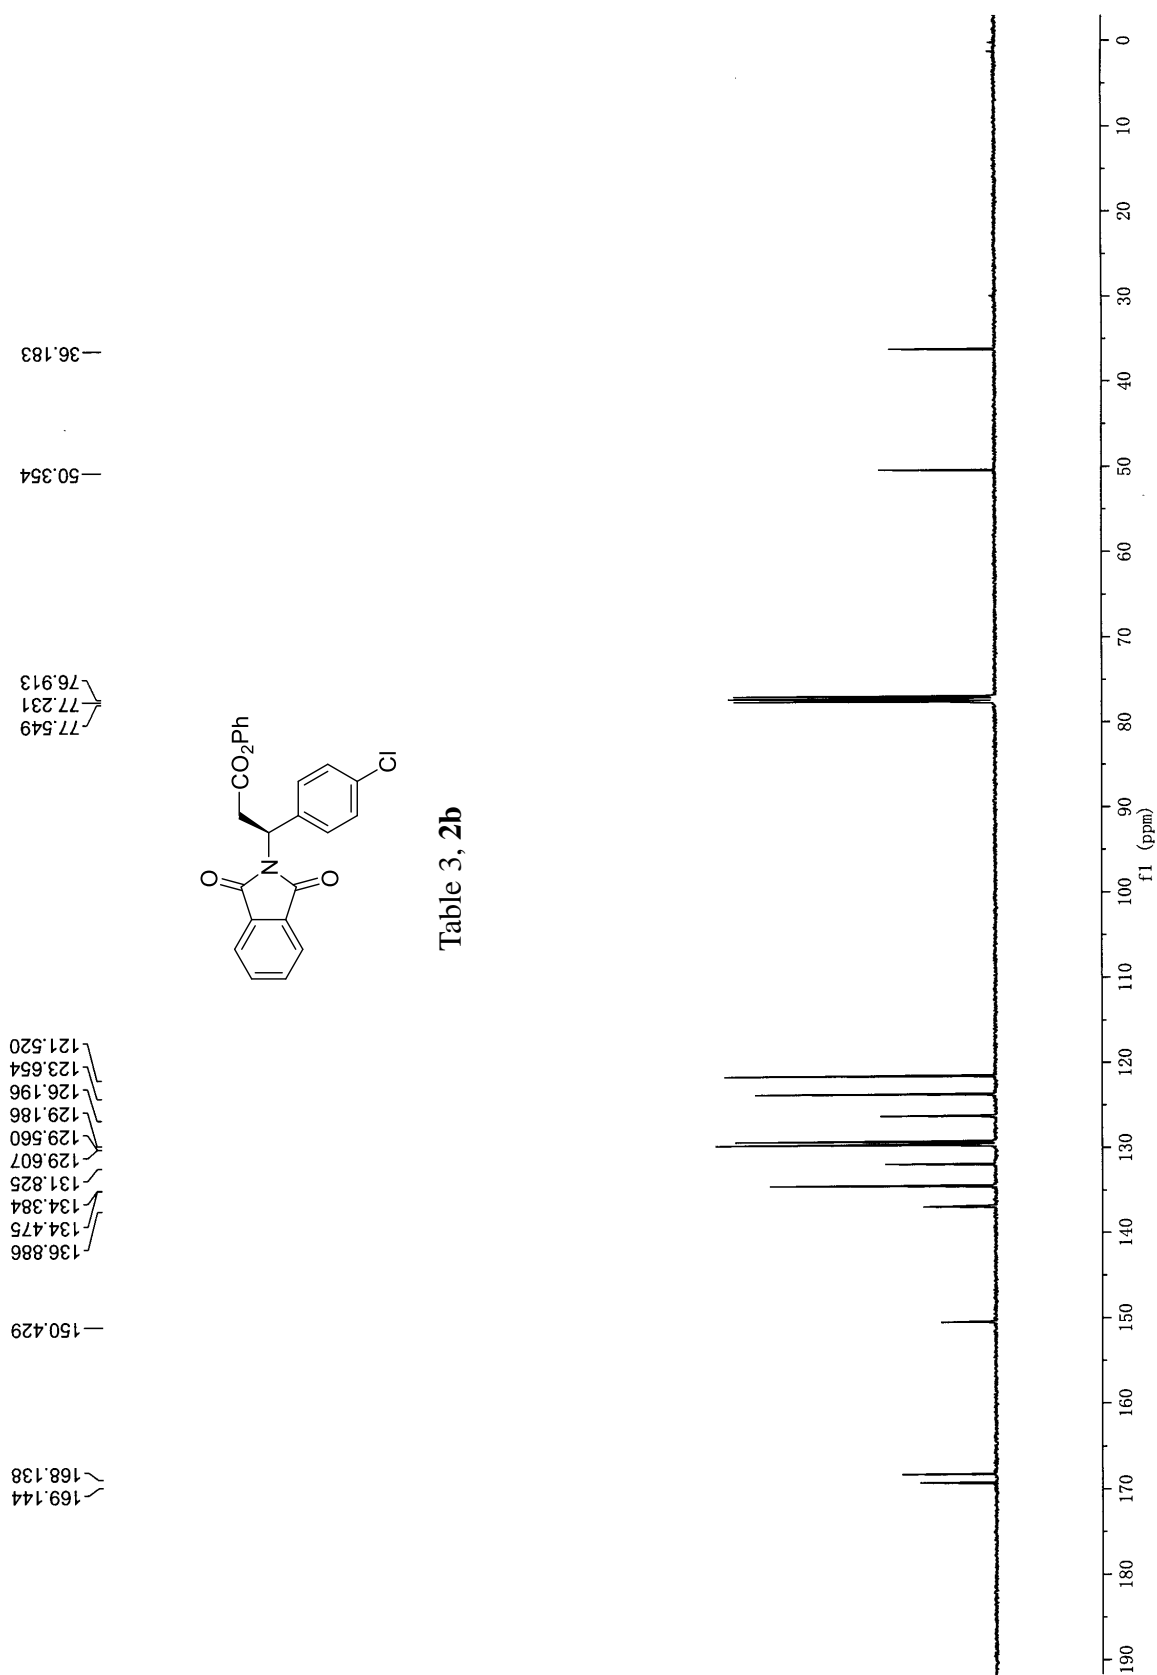

<sup>1</sup>H NMR Spectrum of **2c** (CDCl<sub>3</sub>, 400 MHz)

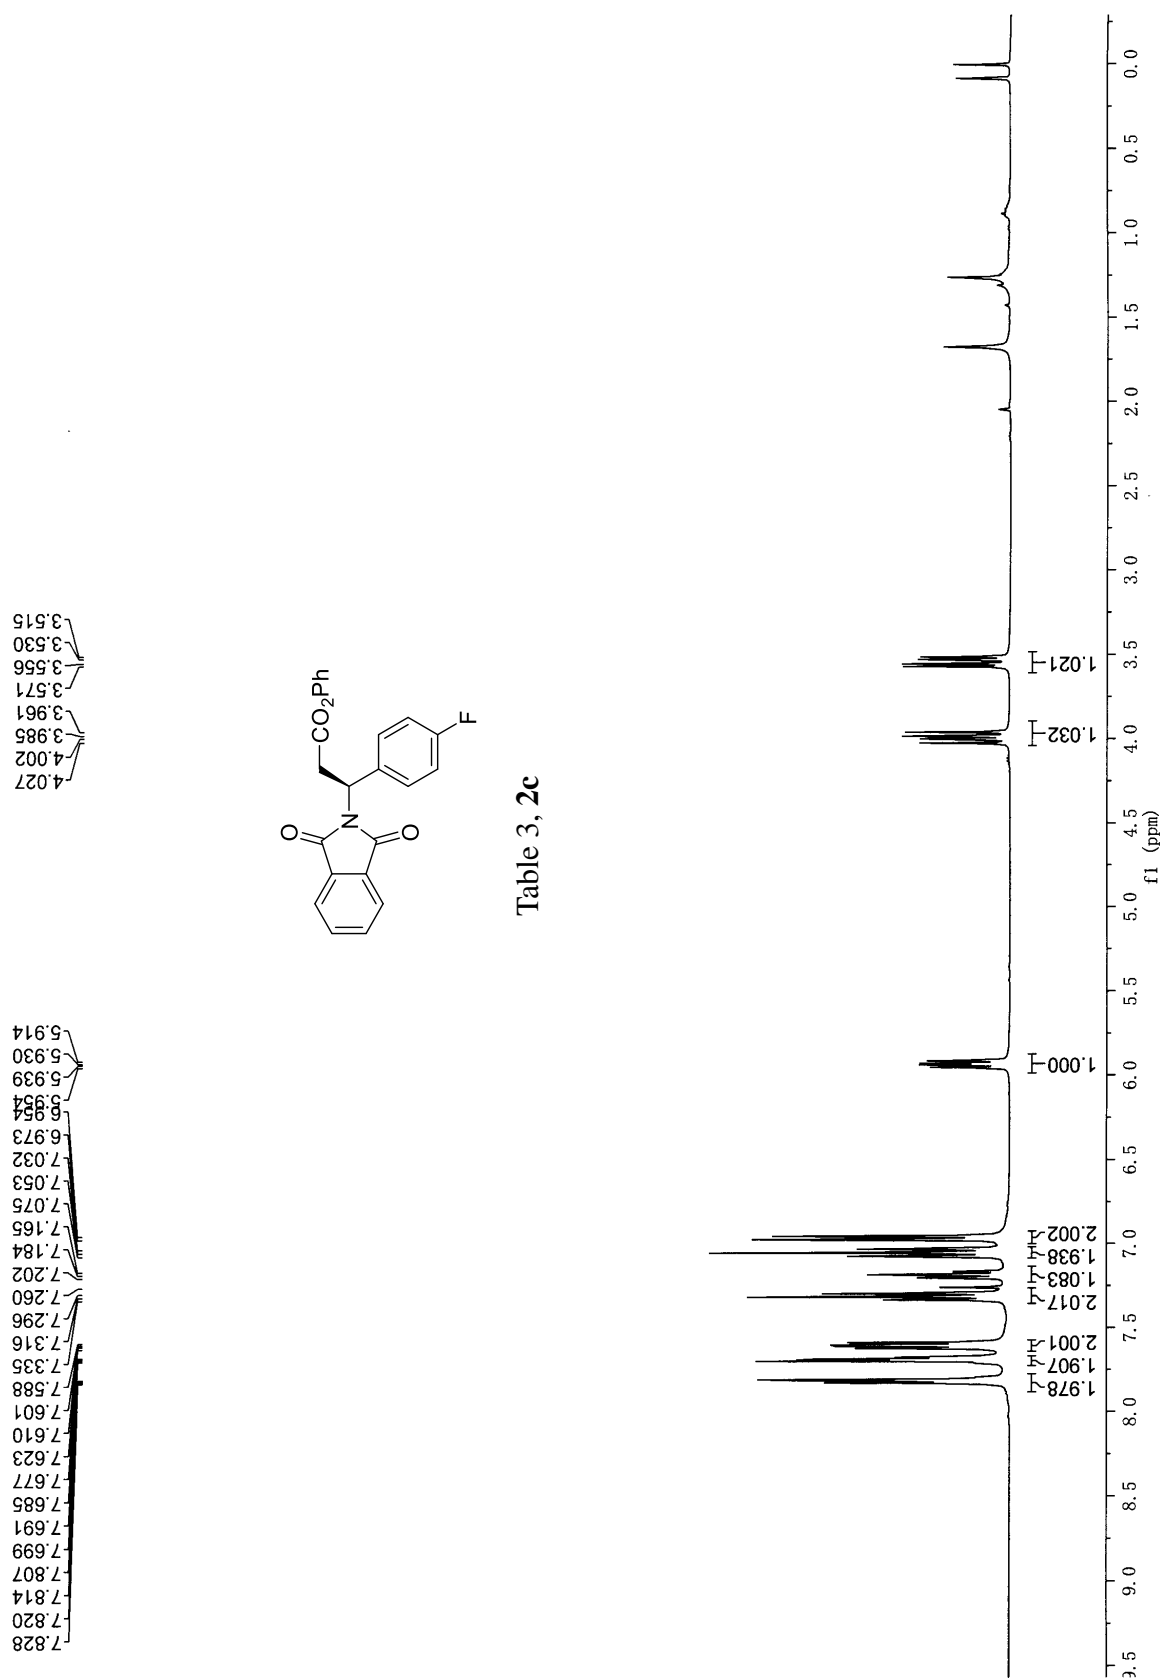

<sup>13</sup>C NMR Spectrum of **2c** (CDCl<sub>3</sub>, 100 MHz)

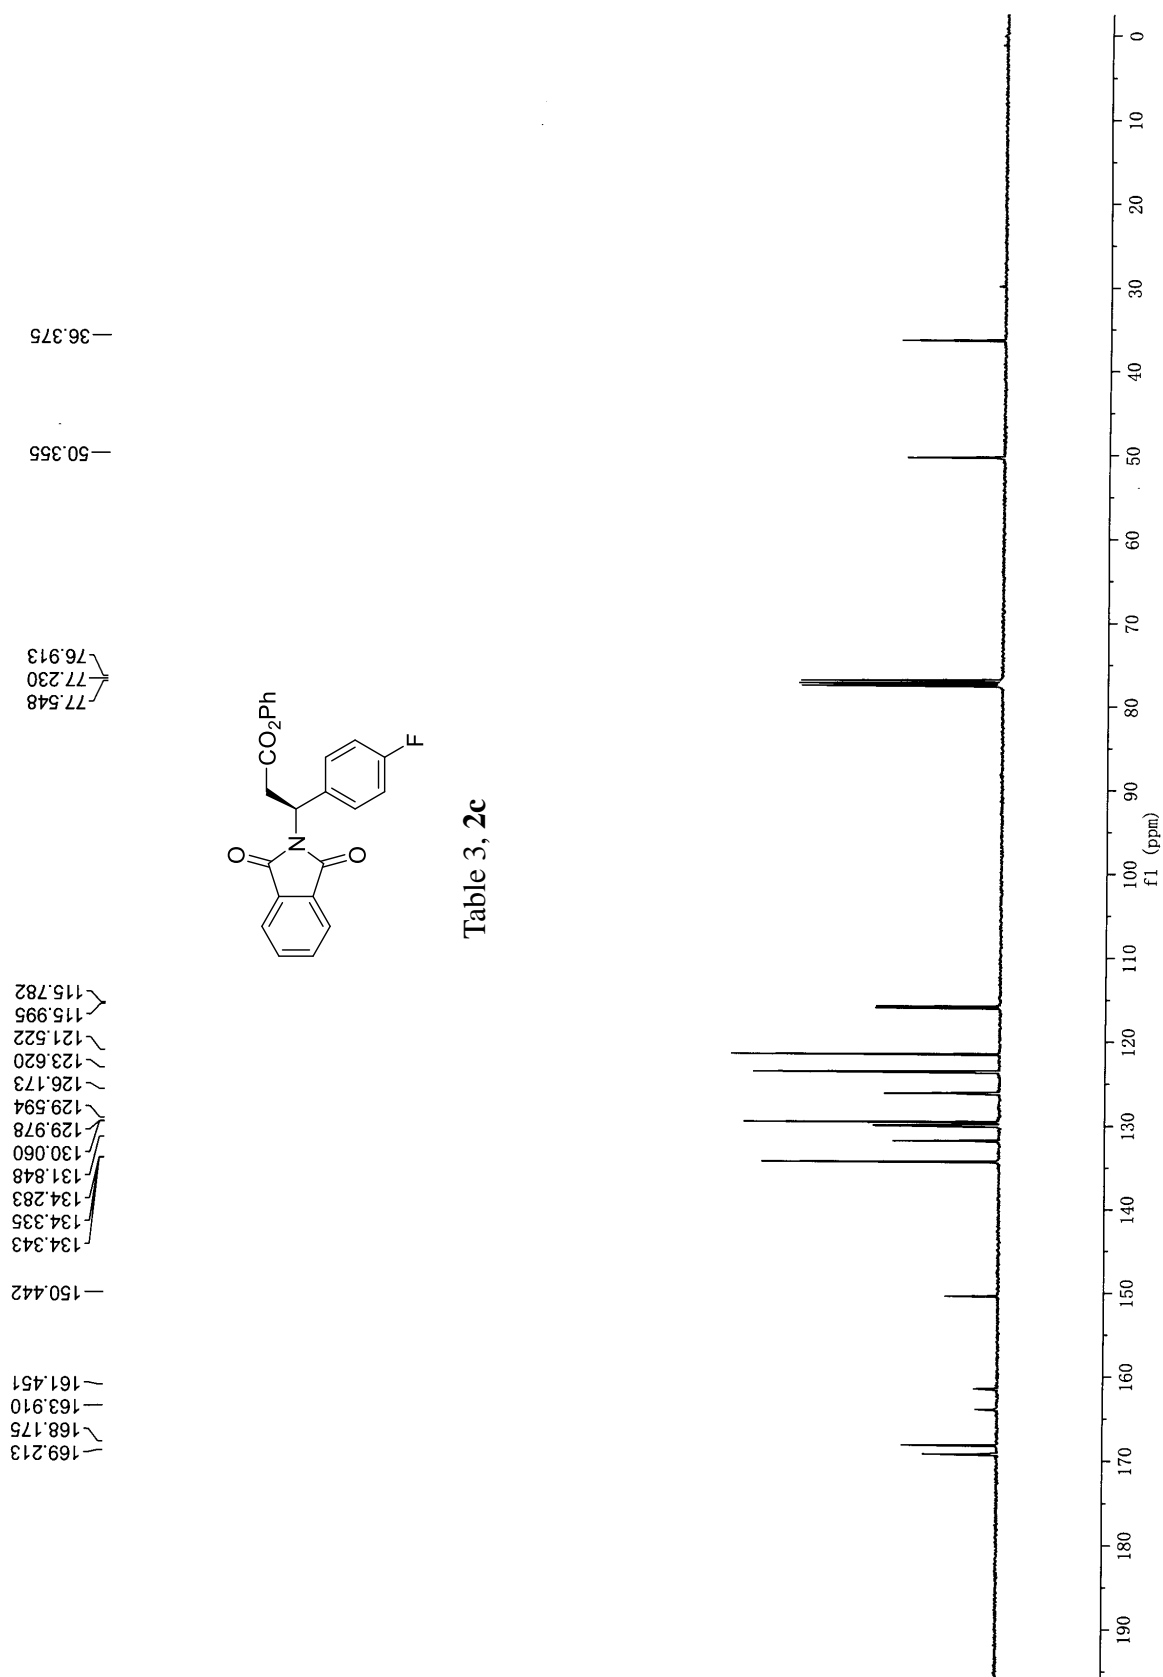

<sup>1</sup>H NMR Spectrum of **2d** (CDCl<sub>3</sub>, 400 MHz)

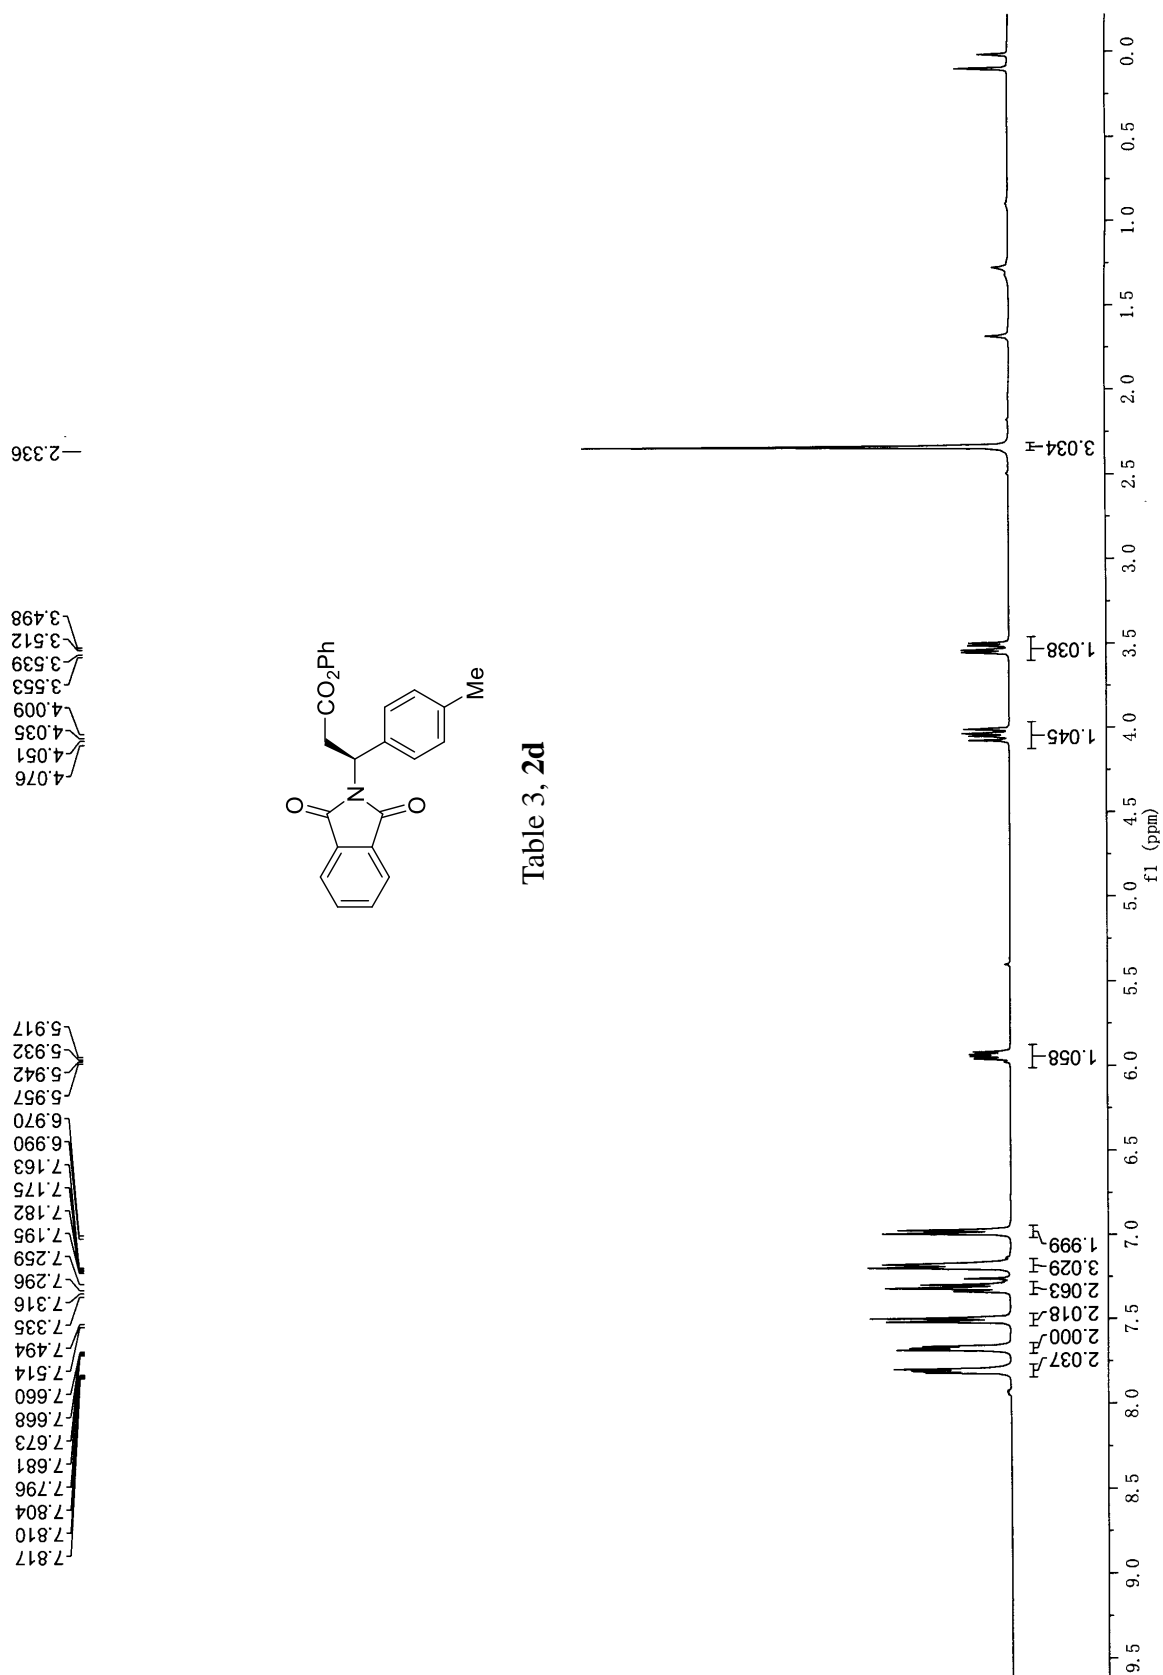

<sup>13</sup>C NMR Spectrum of **2d** (CDCl<sub>3</sub>, 100 MHz)

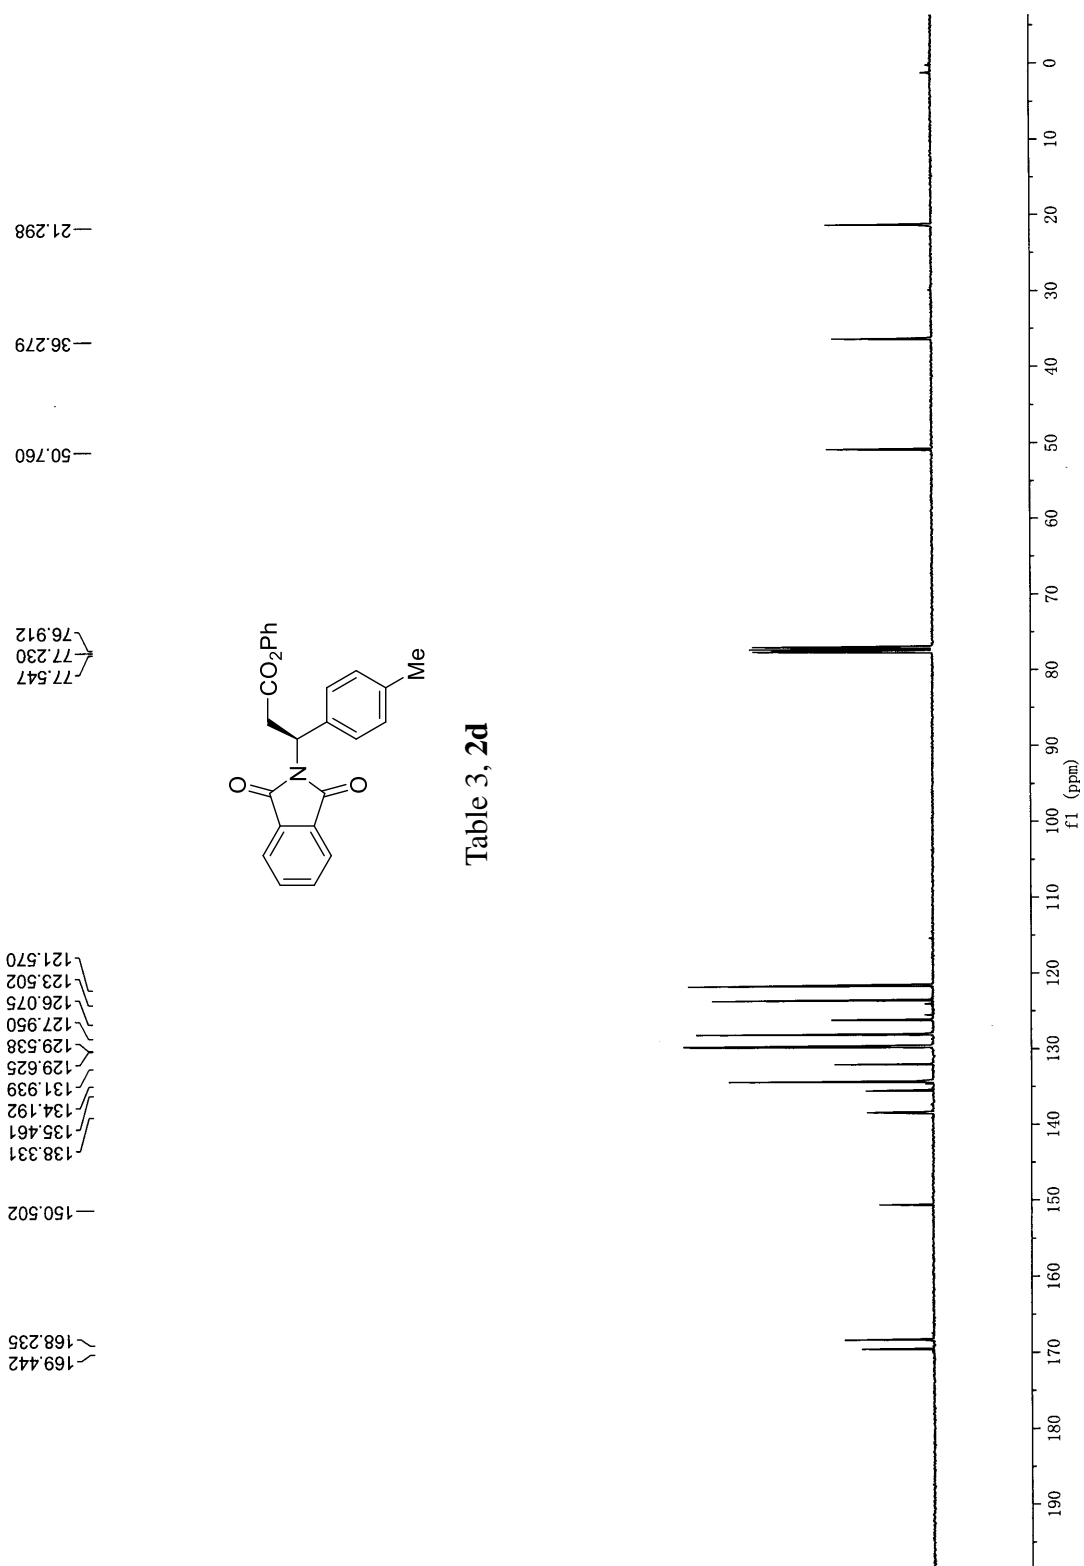



<sup>1</sup>H NMR Spectrum of **2e** (CDCl<sub>3</sub>, 400 MHz)

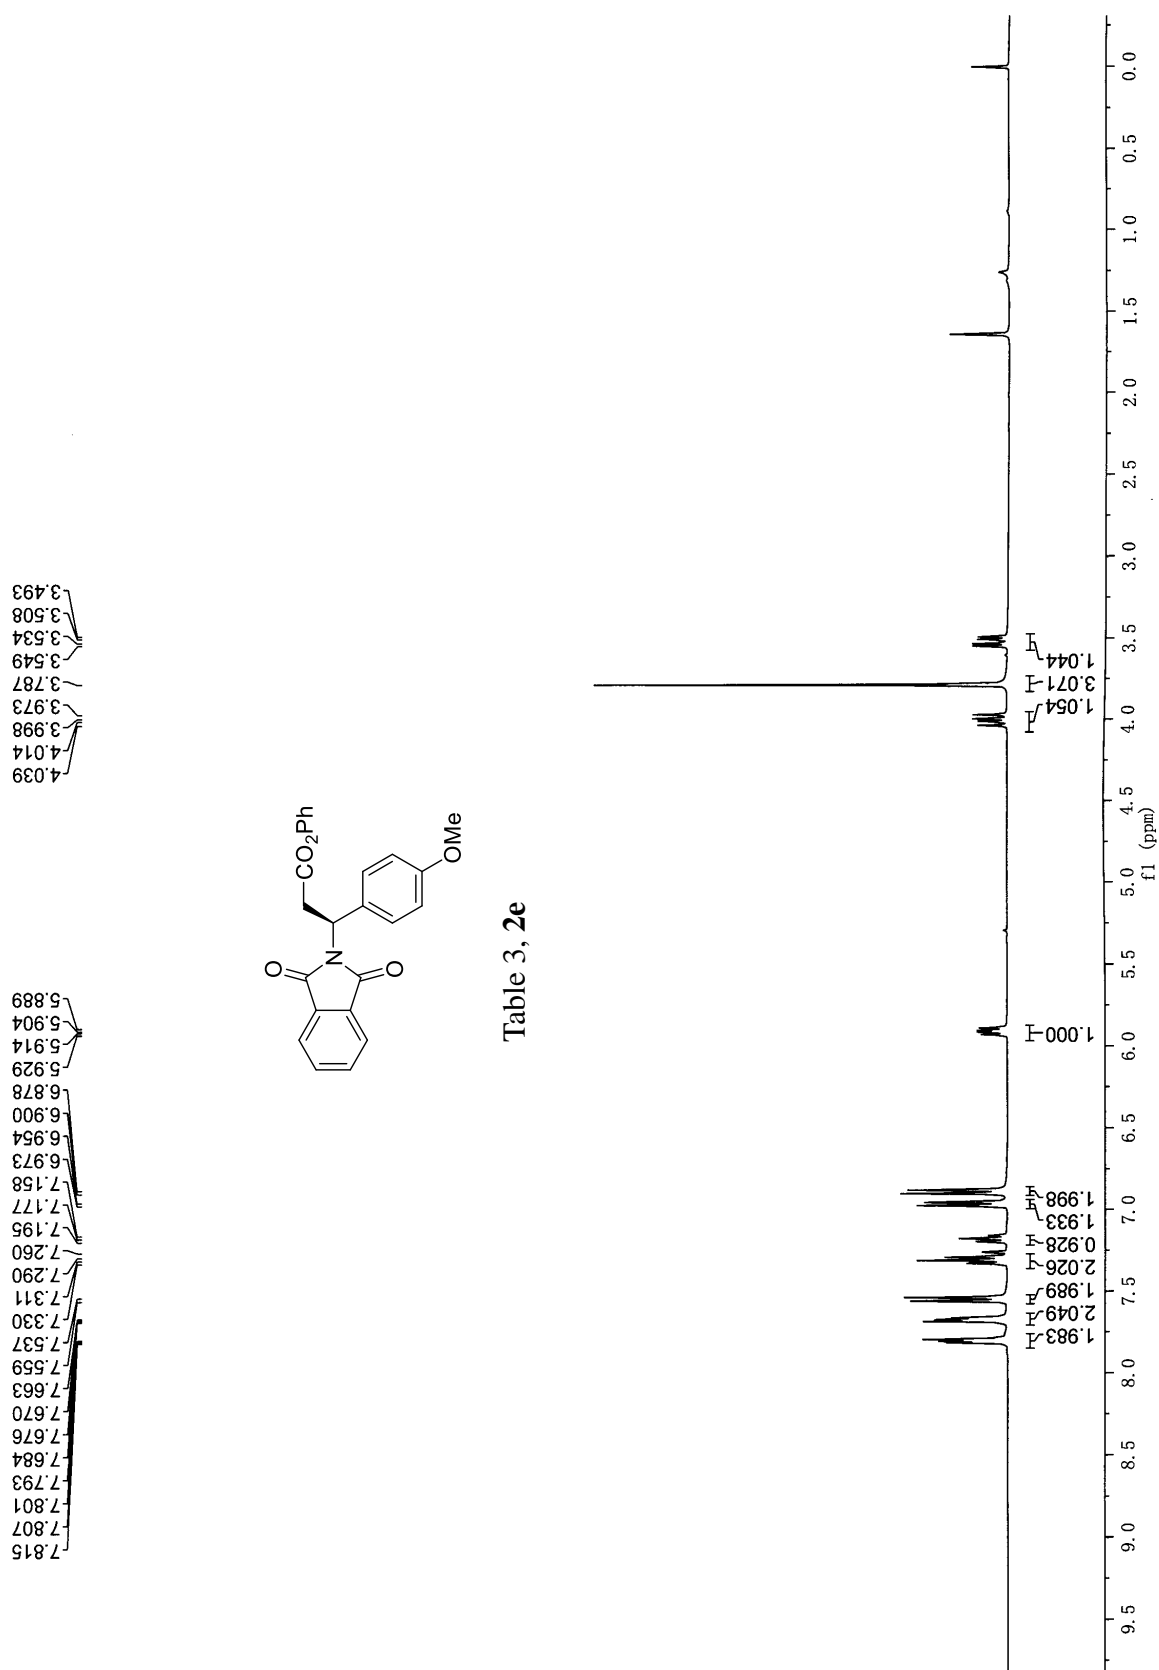

<sup>13</sup>C NMR Spectrum of **2e** (CDCl<sub>3</sub>, 100 MHz)

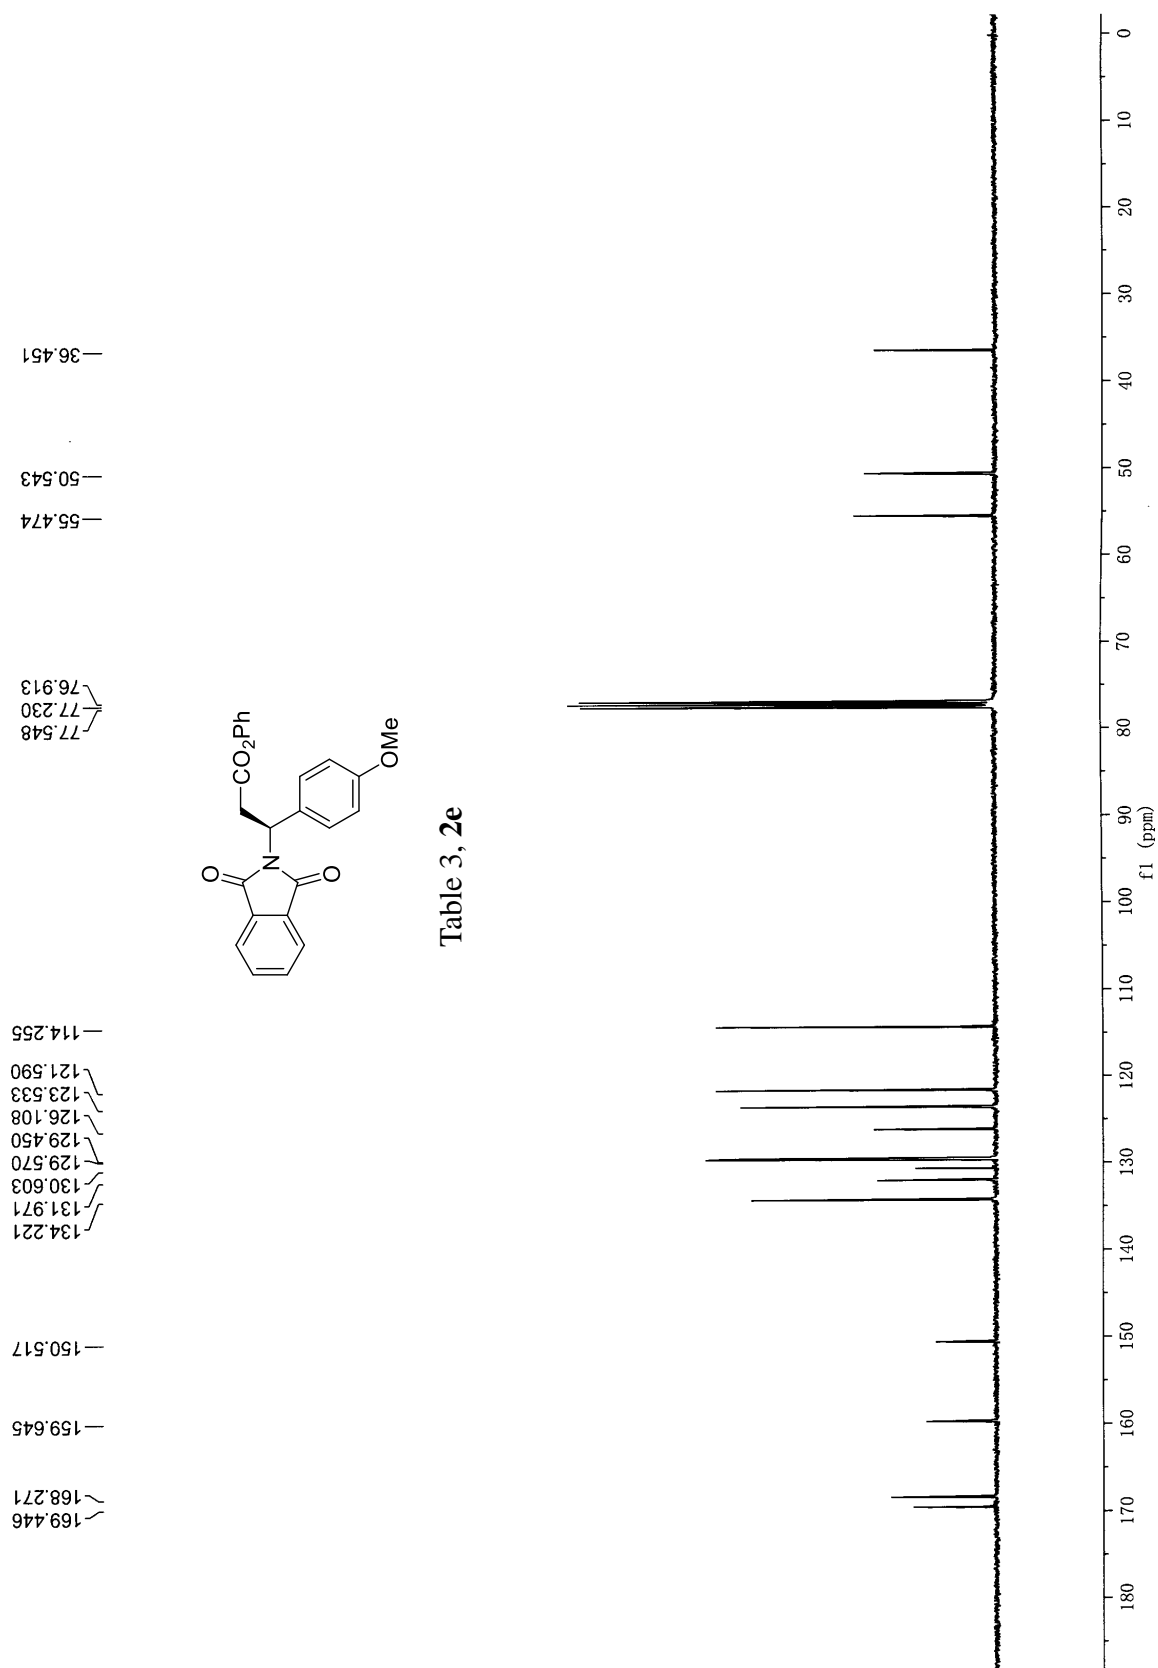

Table 3, **2e**

<sup>1</sup>H NMR Spectrum of **2f** (CDCl<sub>3</sub>, 400 MHz)

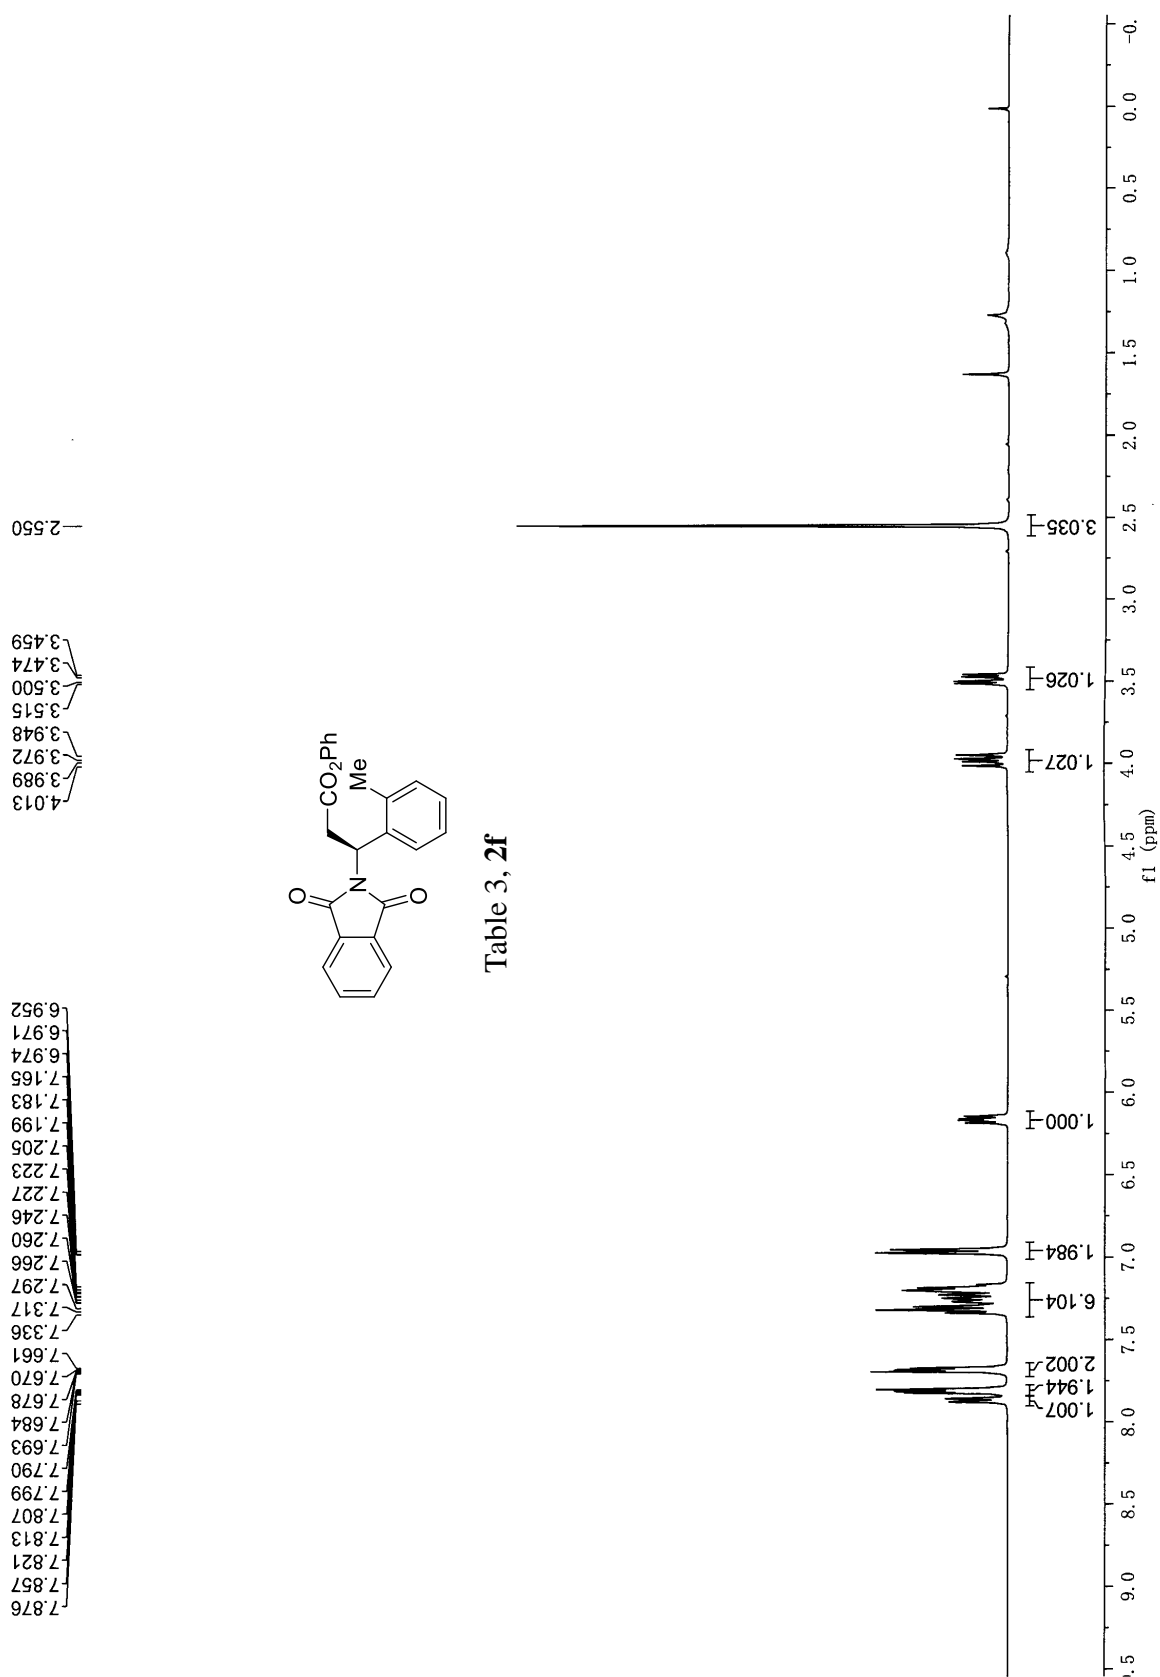

<sup>13</sup>C NMR Spectrum of **2f** (CDCl<sub>3</sub>, 100 MHz)

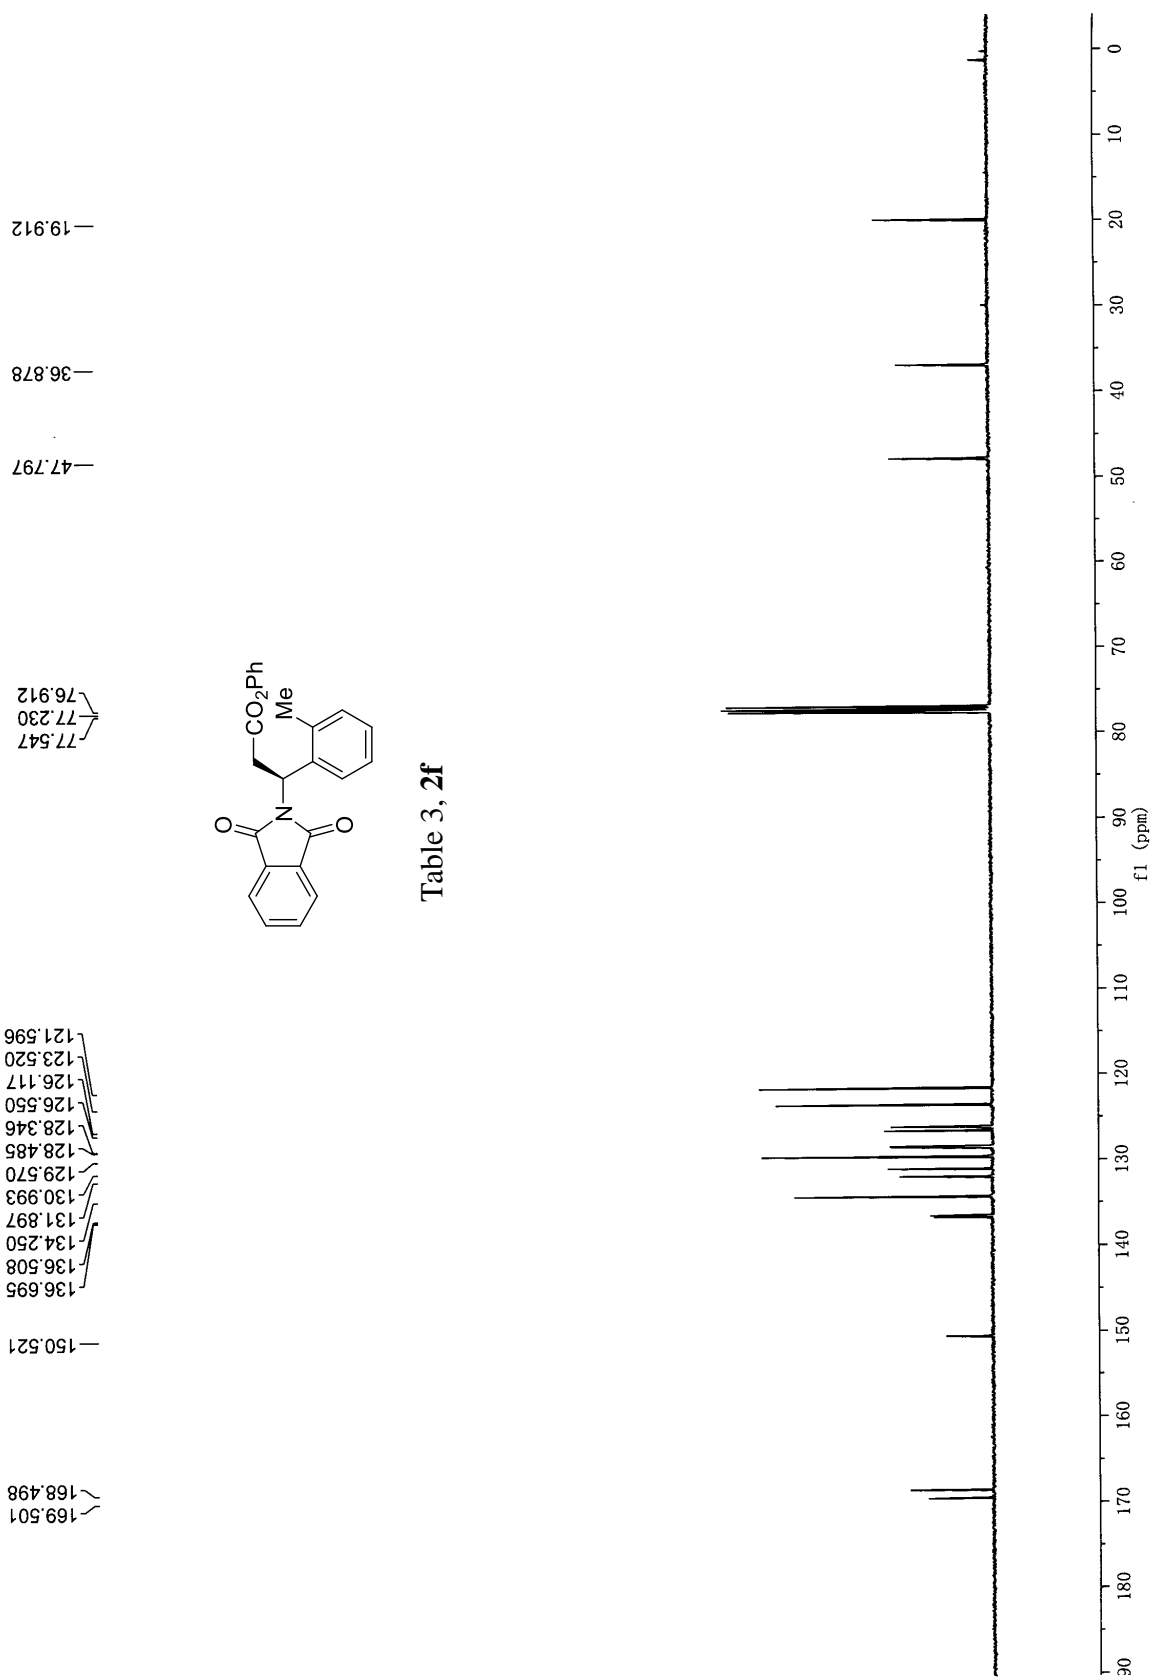

Table 3, **2f**

<sup>1</sup>H NMR Spectrum of **2g** (CDCl<sub>3</sub>, 400 MHz)

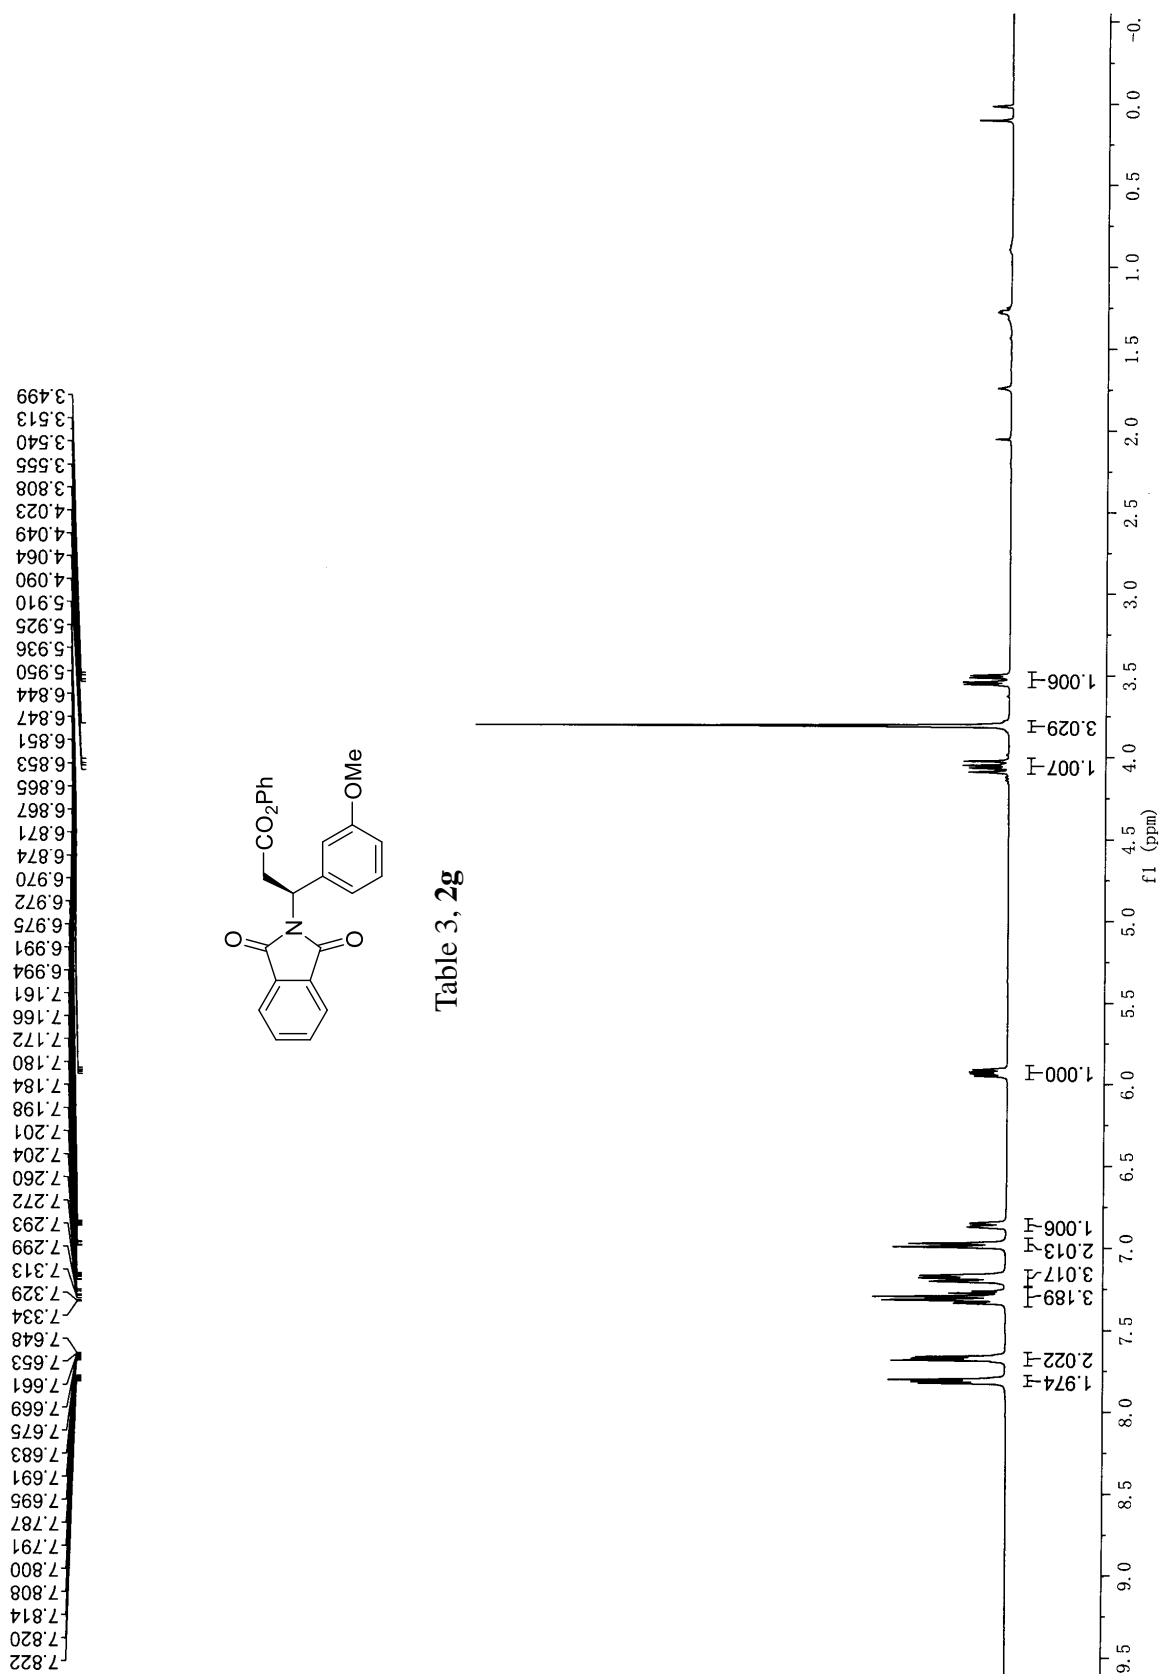

<sup>13</sup>C NMR Spectrum of **2g** (CDCl<sub>3</sub>, 100 MHz)

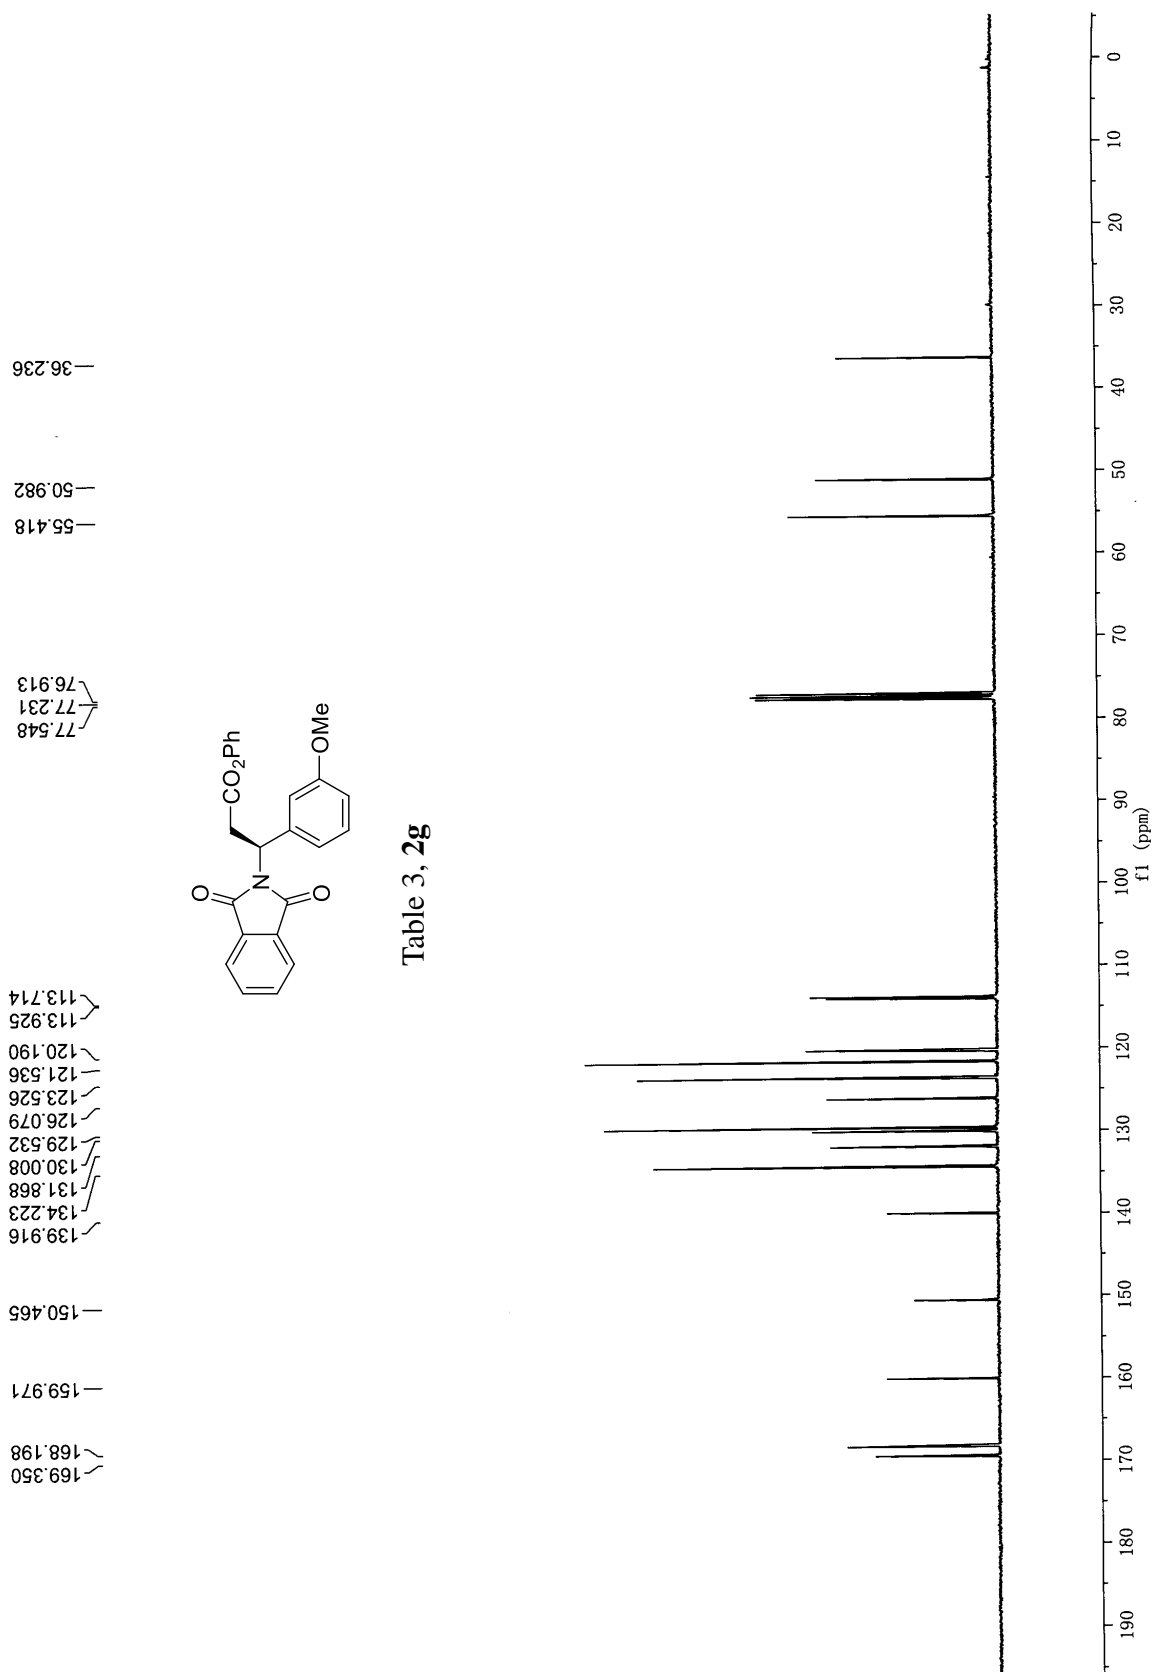

<sup>1</sup>H NMR Spectrum of **2h** (CDCl<sub>3</sub>, 400 MHz)

8.060  
7.879  
7.864  
7.843  
7.832  
7.825  
7.818  
7.811  
7.739  
7.736  
7.718  
7.714  
7.699  
7.688  
7.681  
7.675  
7.667  
7.513  
7.497  
7.487  
7.478  
7.463  
7.332  
7.313  
7.293  
7.260  
7.201  
7.182  
7.164  
6.996  
6.975  
6.152  
6.138  
6.127  
6.112  
4.197  
4.172  
4.156  
4.130  
3.685  
3.670  
3.643  
3.629

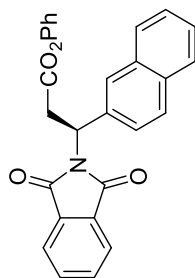

Table 3, **2h**

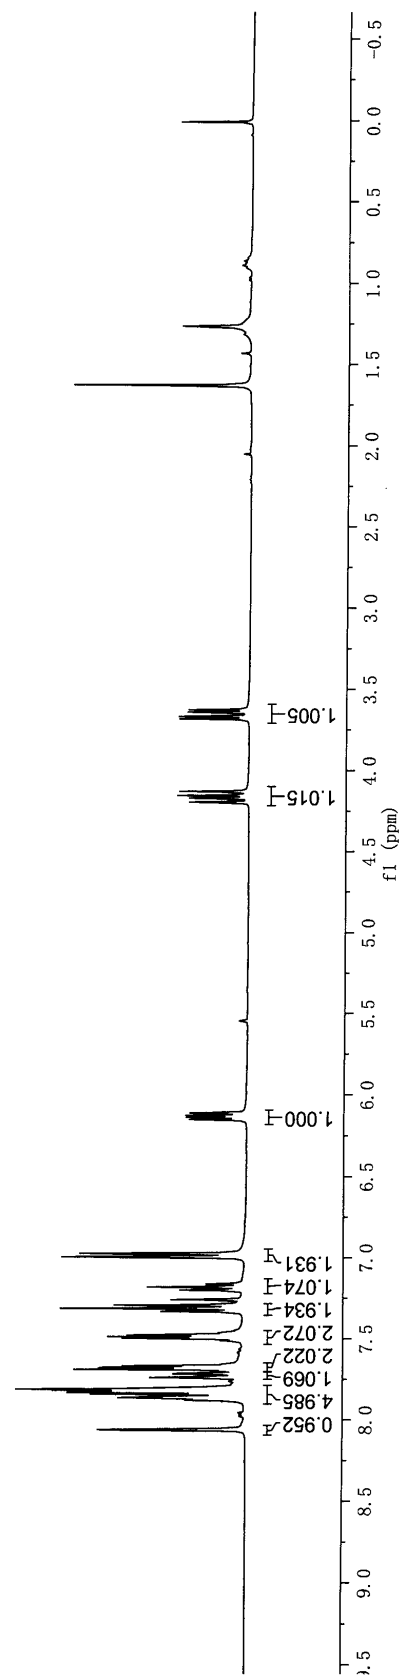

<sup>13</sup>C NMR Spectrum of **2h** (CDCl<sub>3</sub>, 100 MHz)

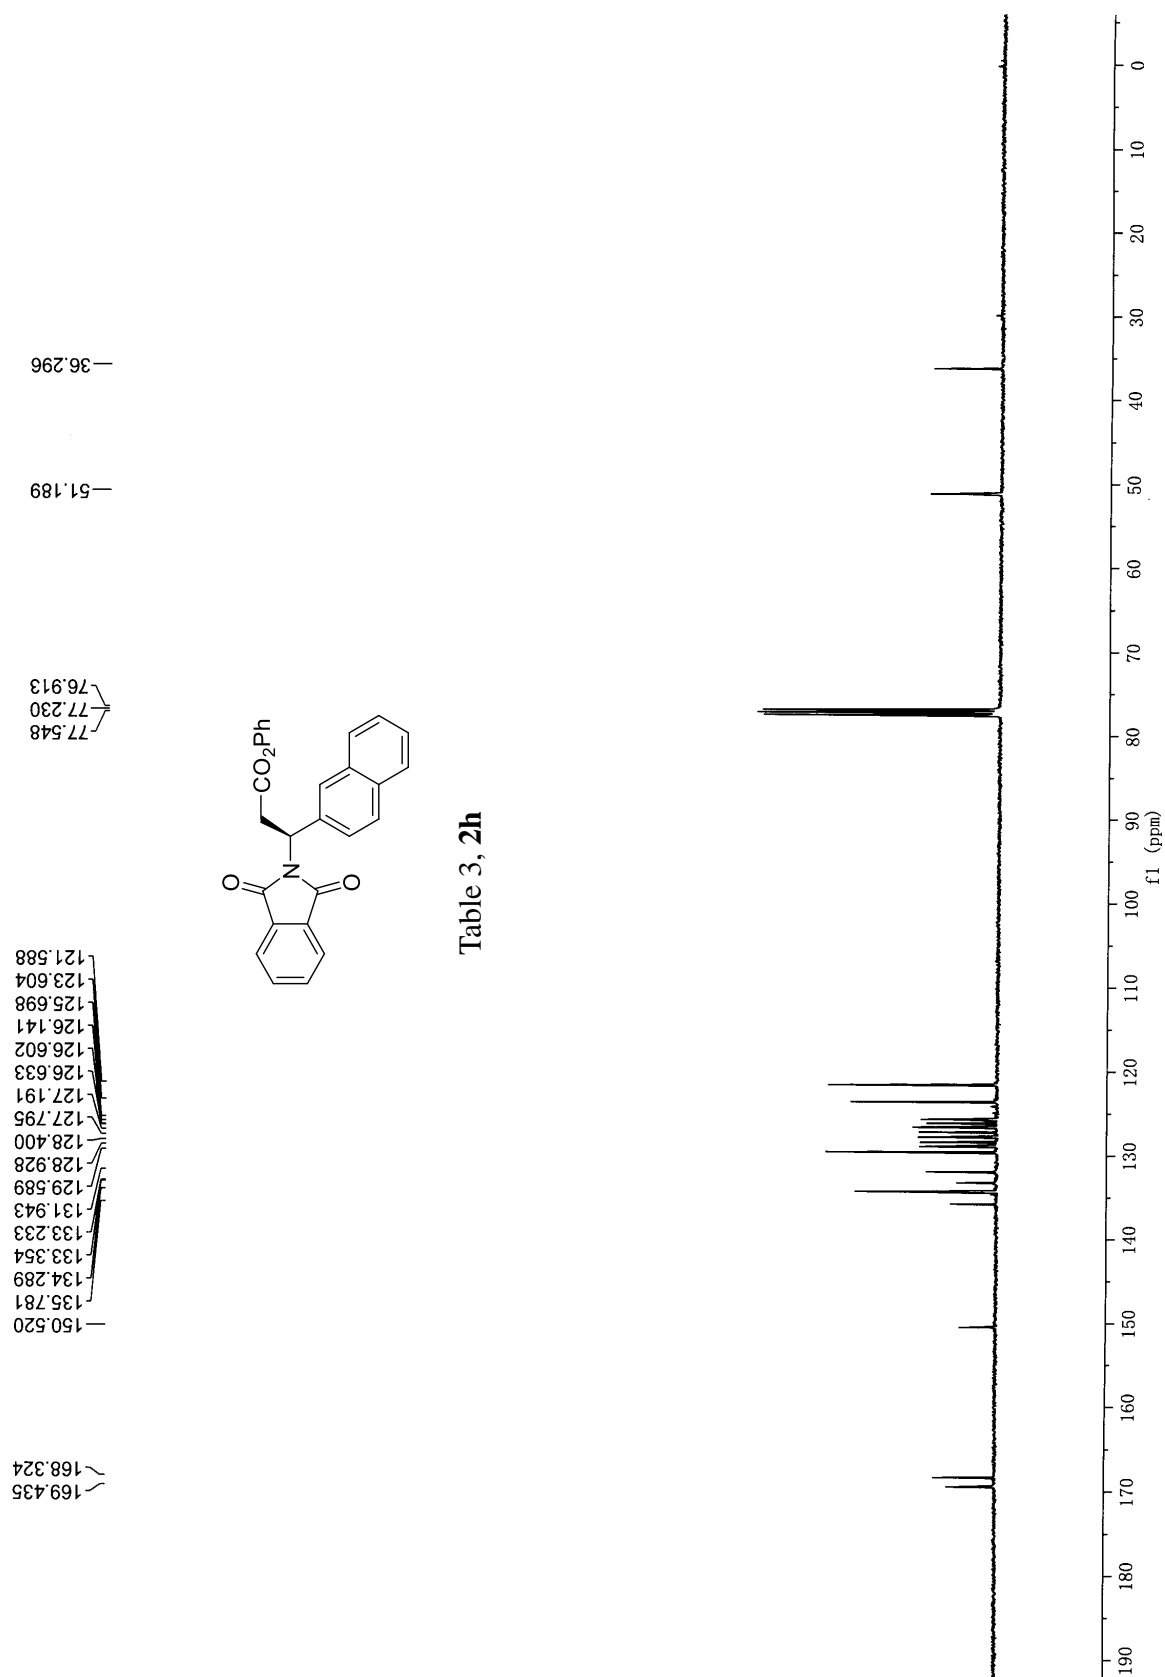



<sup>1</sup>H NMR Spectrum of **2i** (CDCl<sub>3</sub>, 400 MHz)

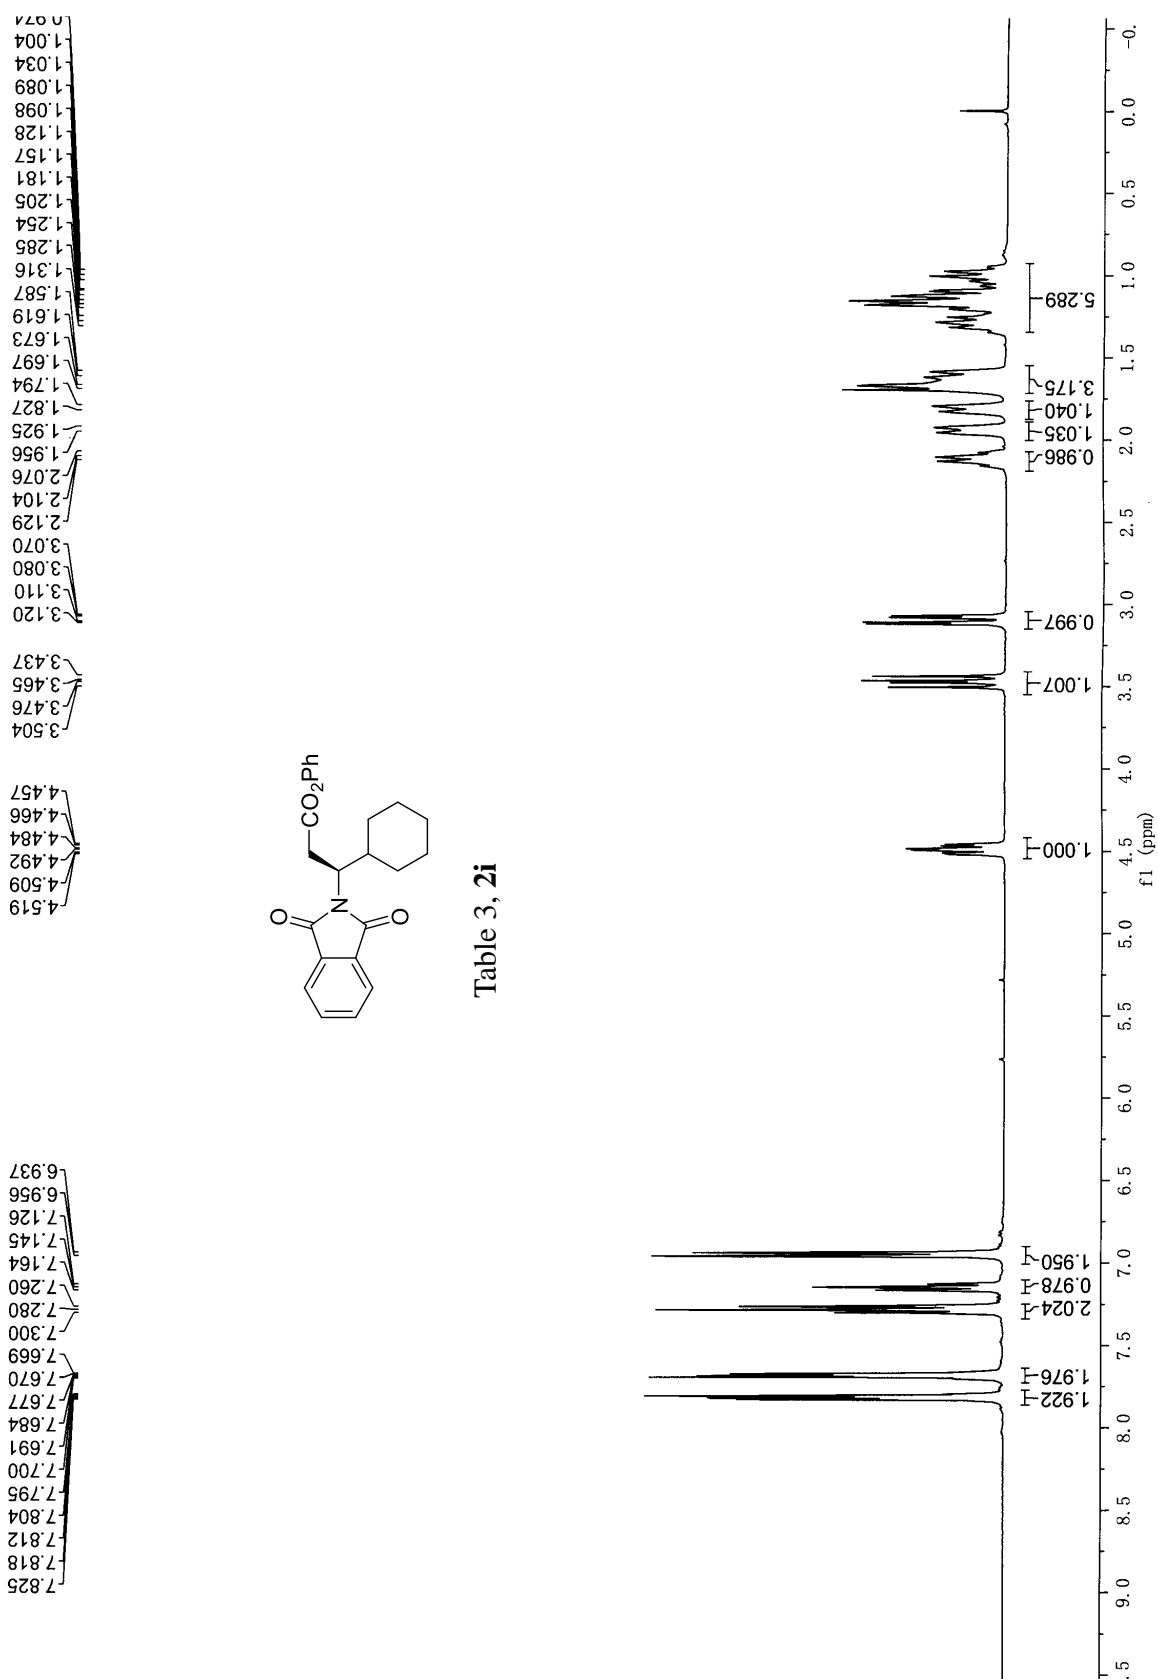

<sup>13</sup>C NMR Spectrum of **2i** (CDCl<sub>3</sub>, 100 MHz)

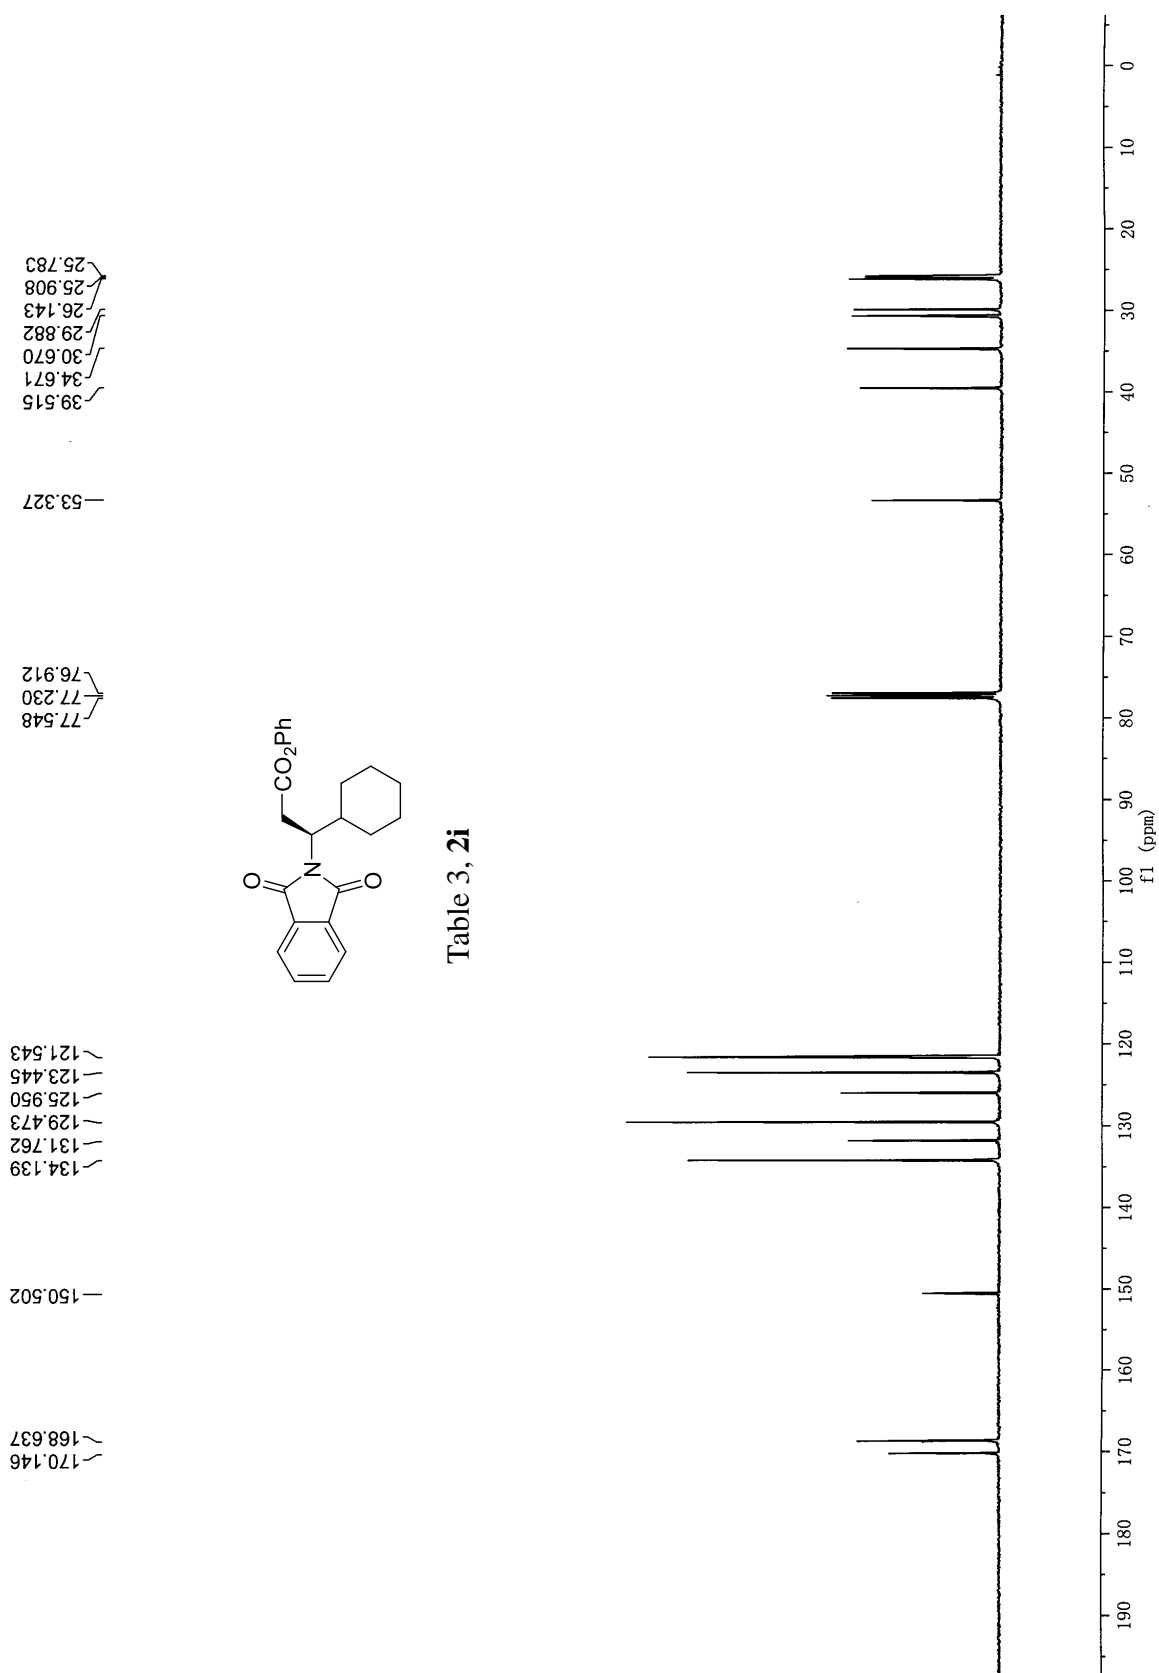

<sup>1</sup>H NMR Spectrum of **2j** (CDCl<sub>3</sub>, 400 MHz)

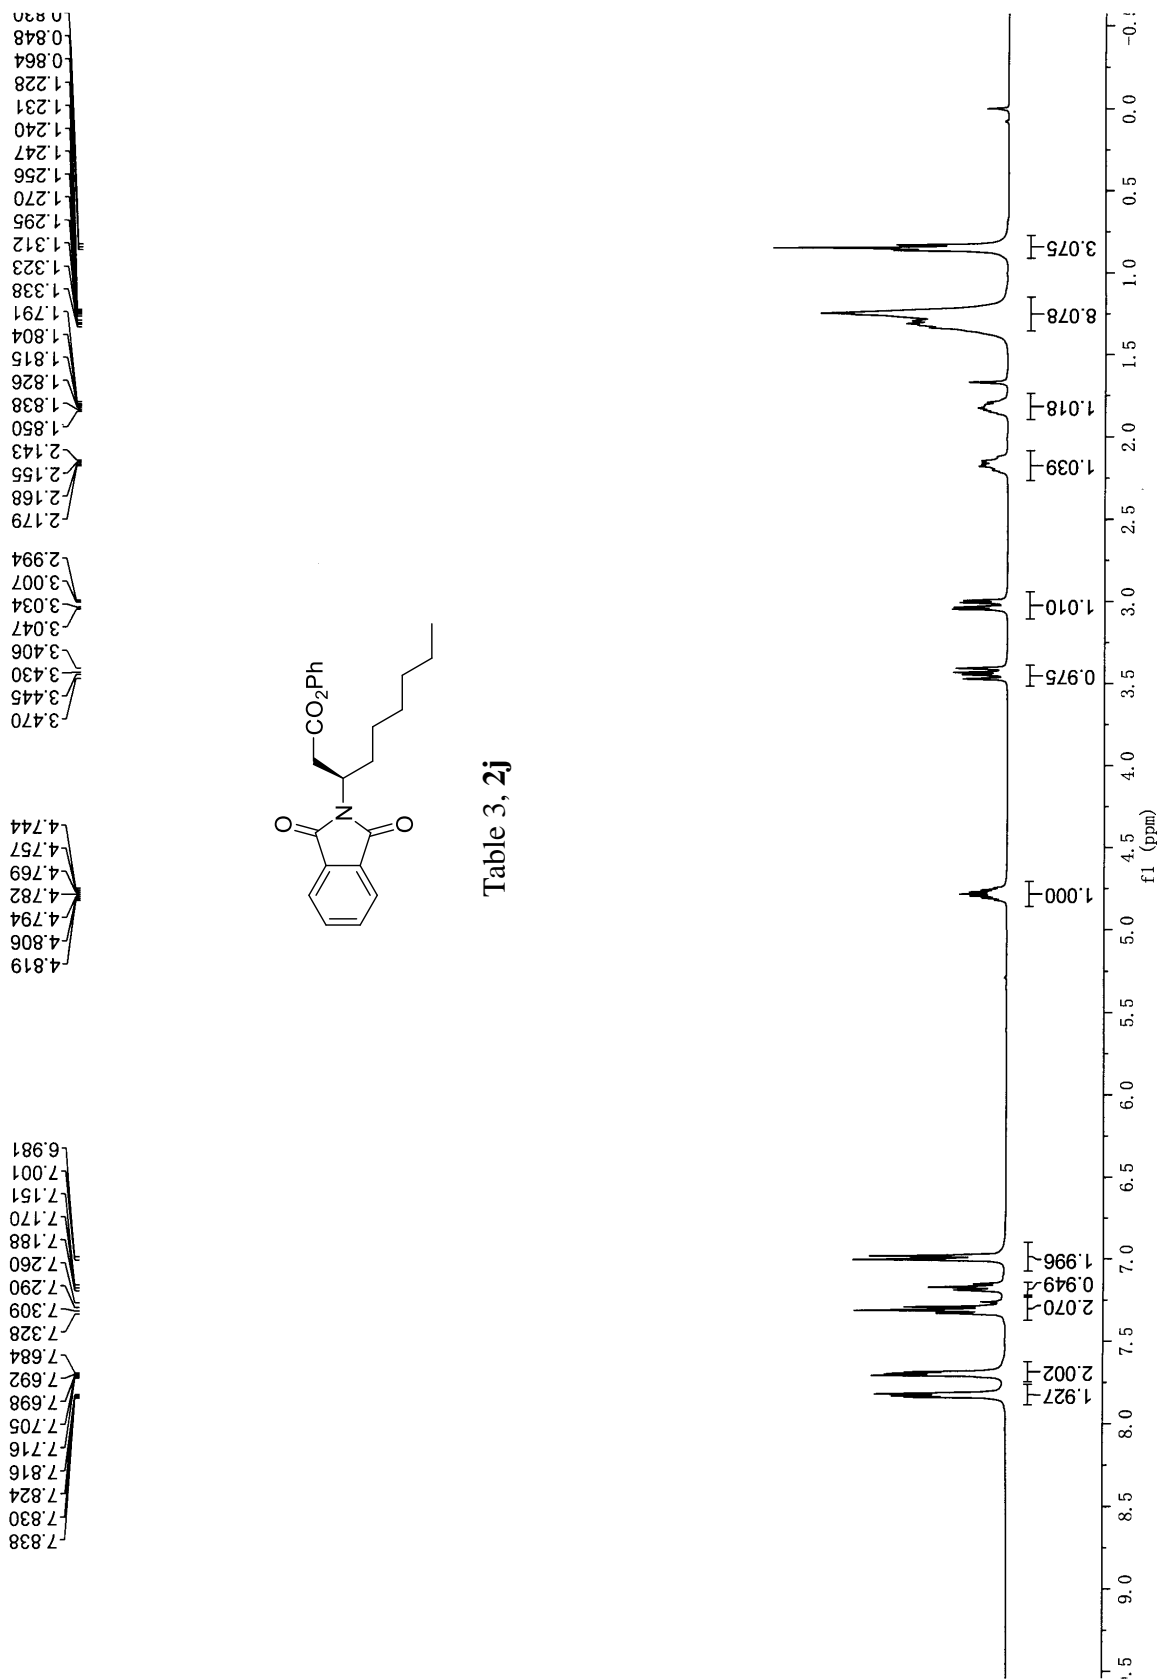

<sup>13</sup>C NMR Spectrum of **2j** (CDCl<sub>3</sub>, 100 MHz)

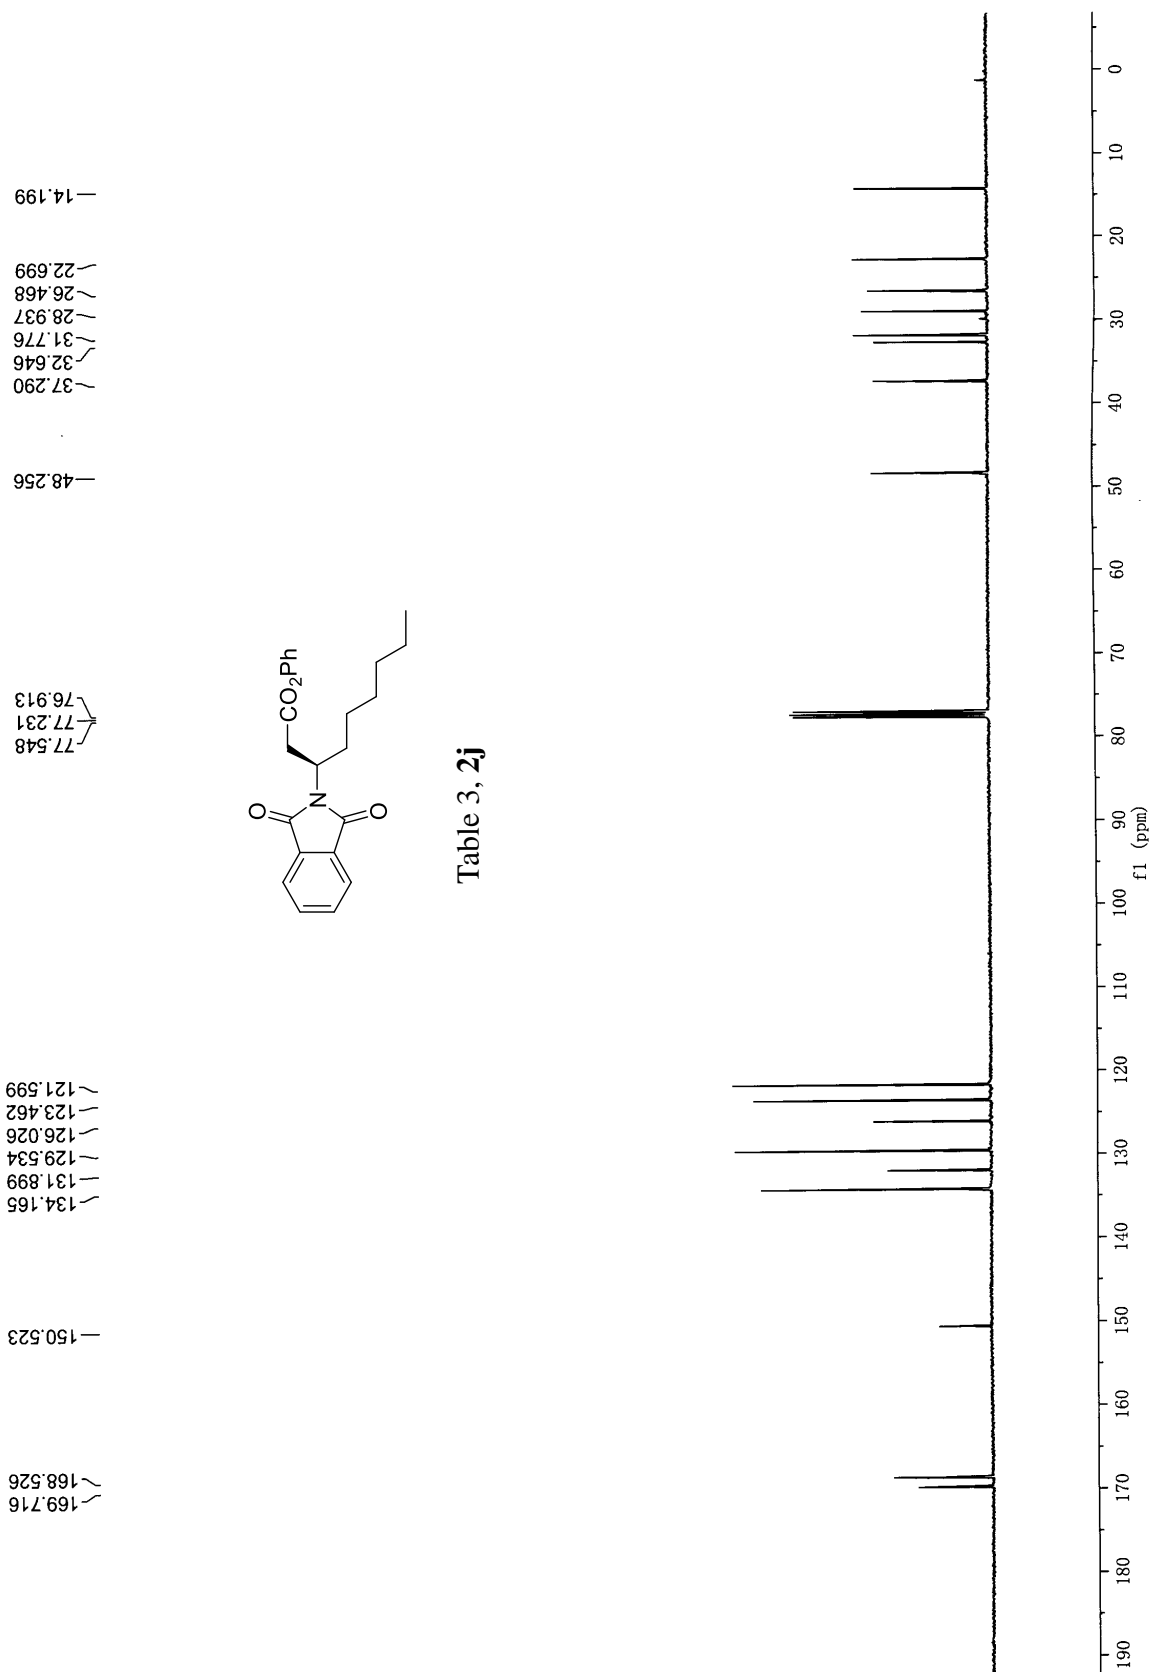

Table 3, **2j**

<sup>1</sup>H NMR Spectrum of **3** (D<sub>2</sub>O, 400 MHz)

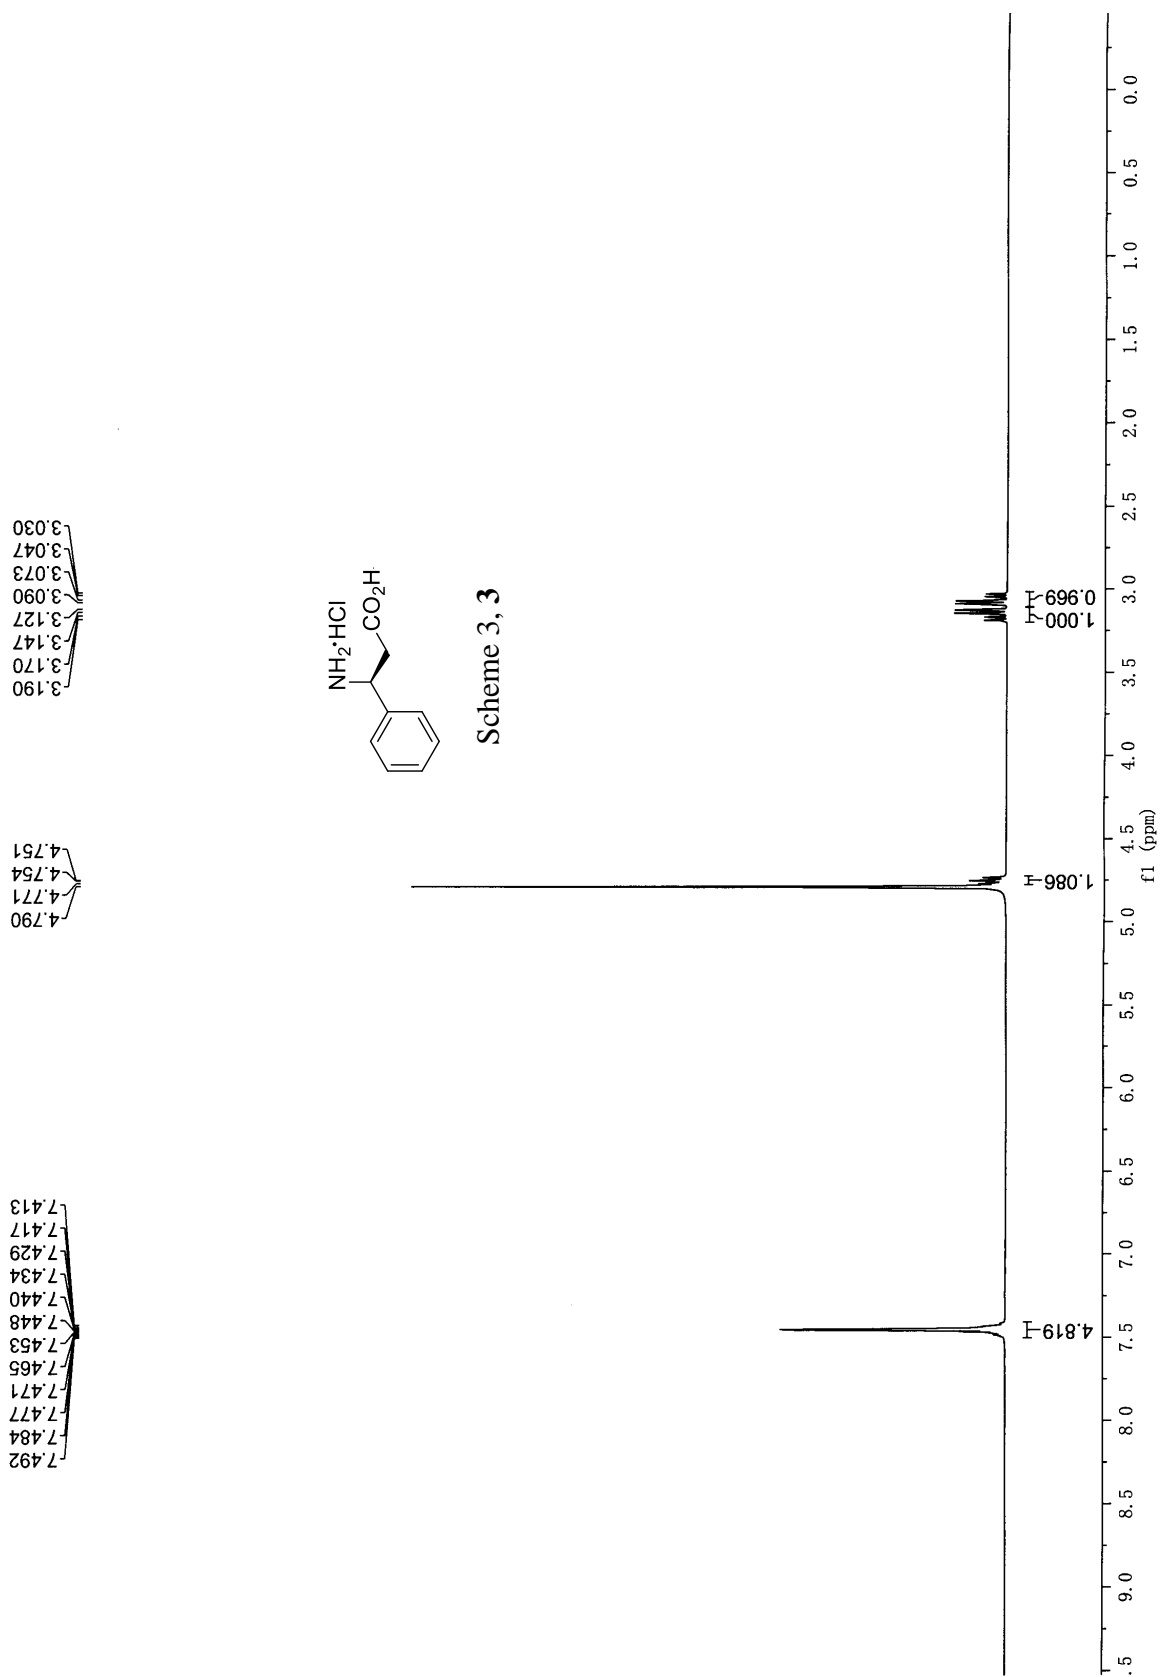

$^{13}\text{C}$  NMR Spectrum of **3** ( $\text{D}_2\text{O}$ , 100 MHz)

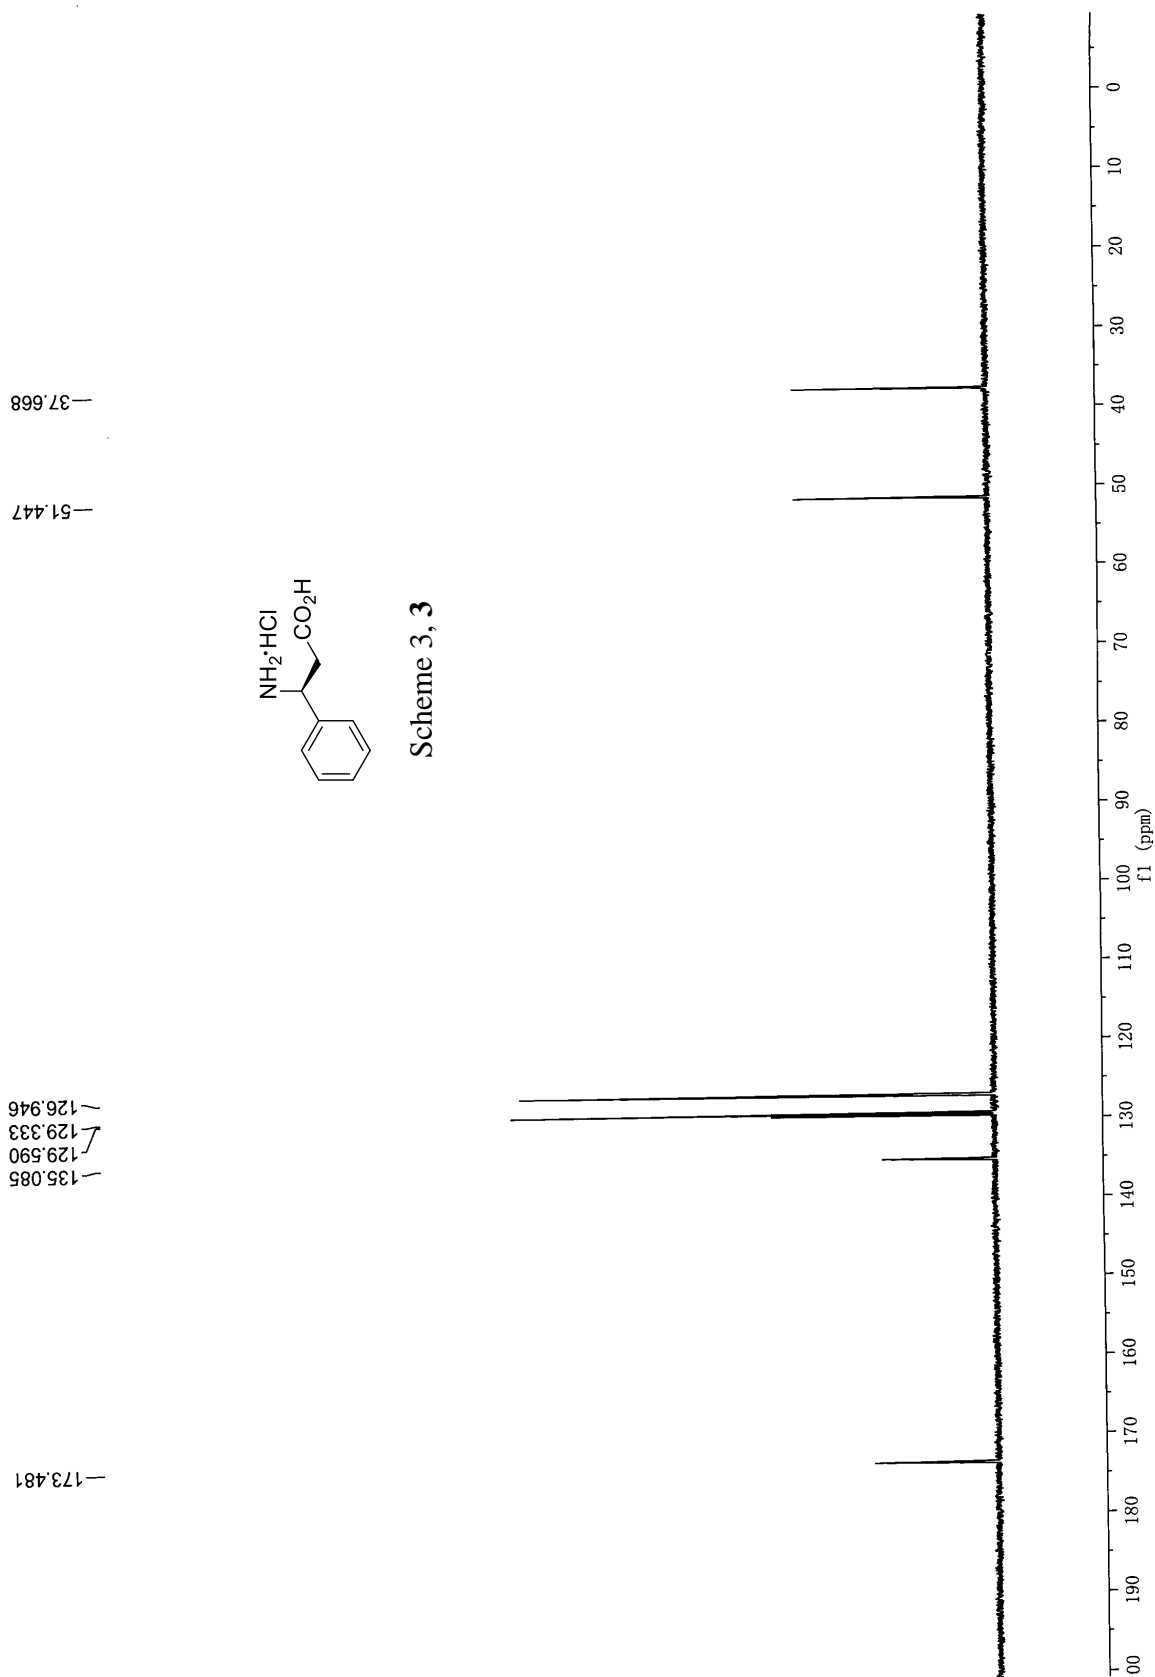

<sup>1</sup>H NMR Spectrum of 4 (CDCl<sub>3</sub>, 400 MHz)

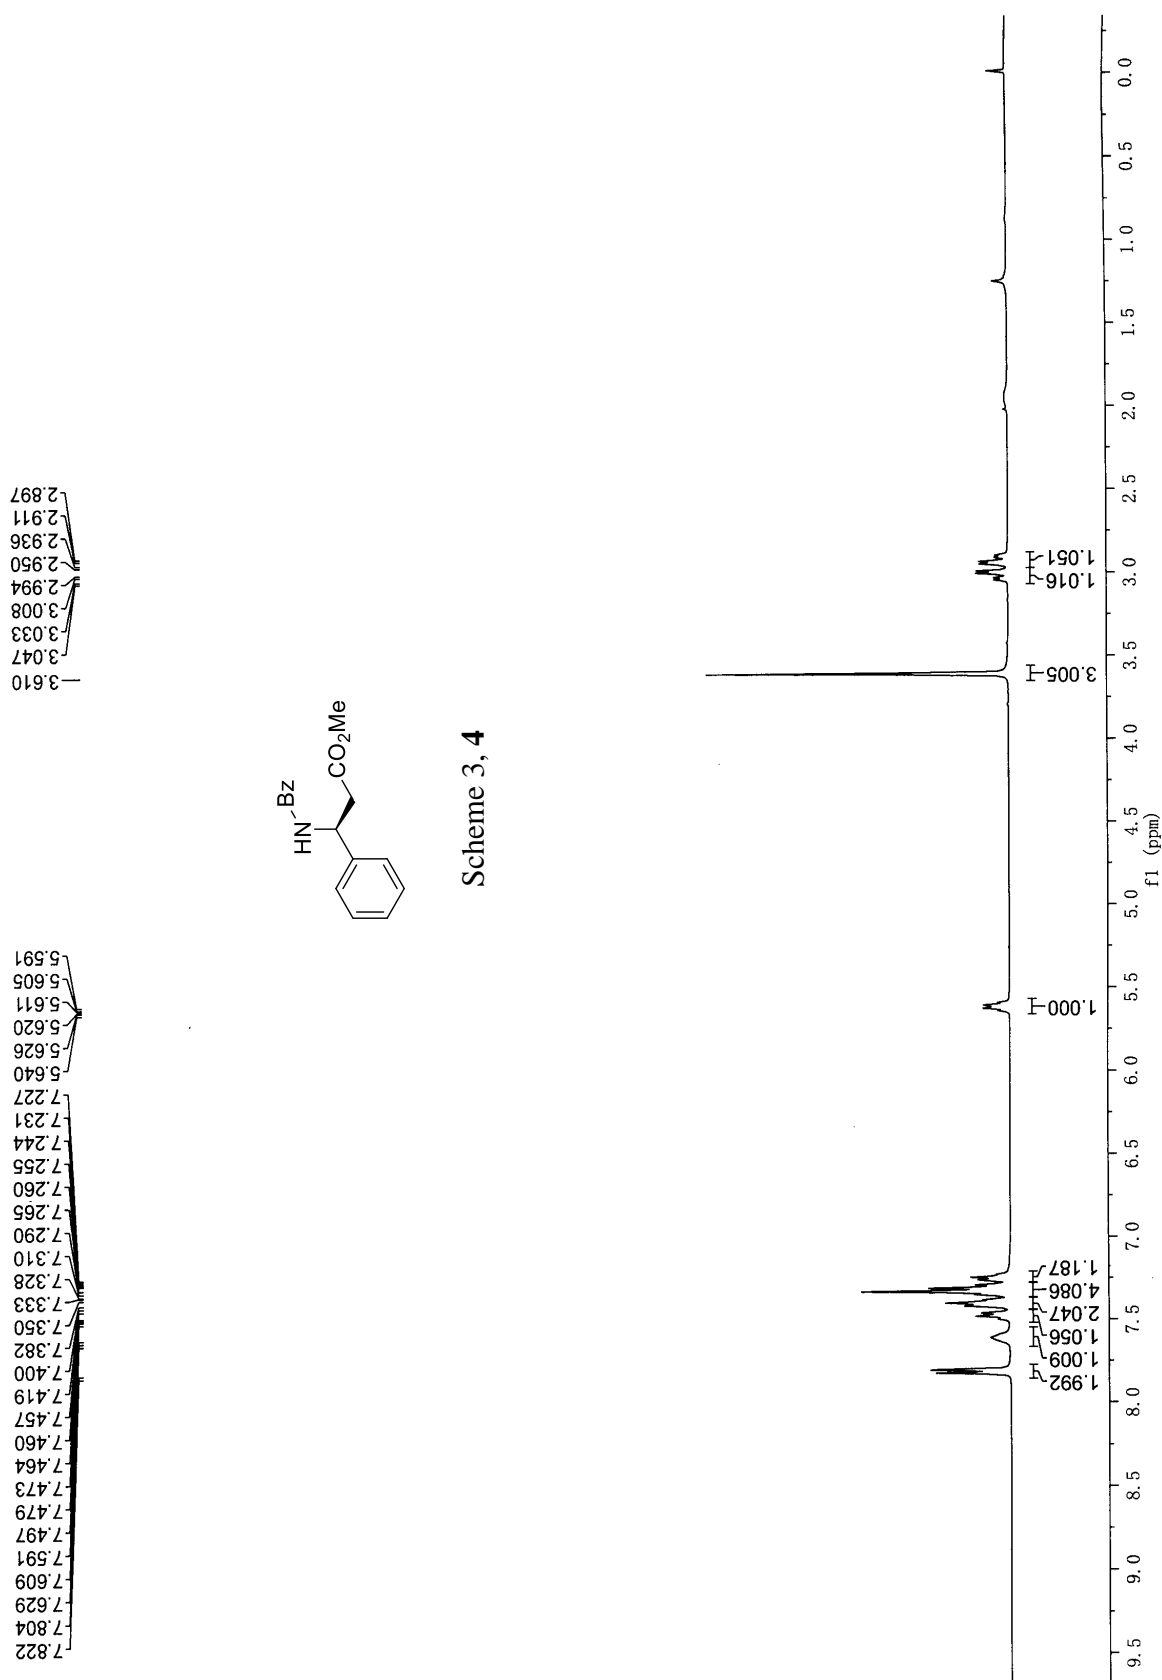

<sup>13</sup>C NMR Spectrum of **4** (CDCl<sub>3</sub>, 100 MHz)

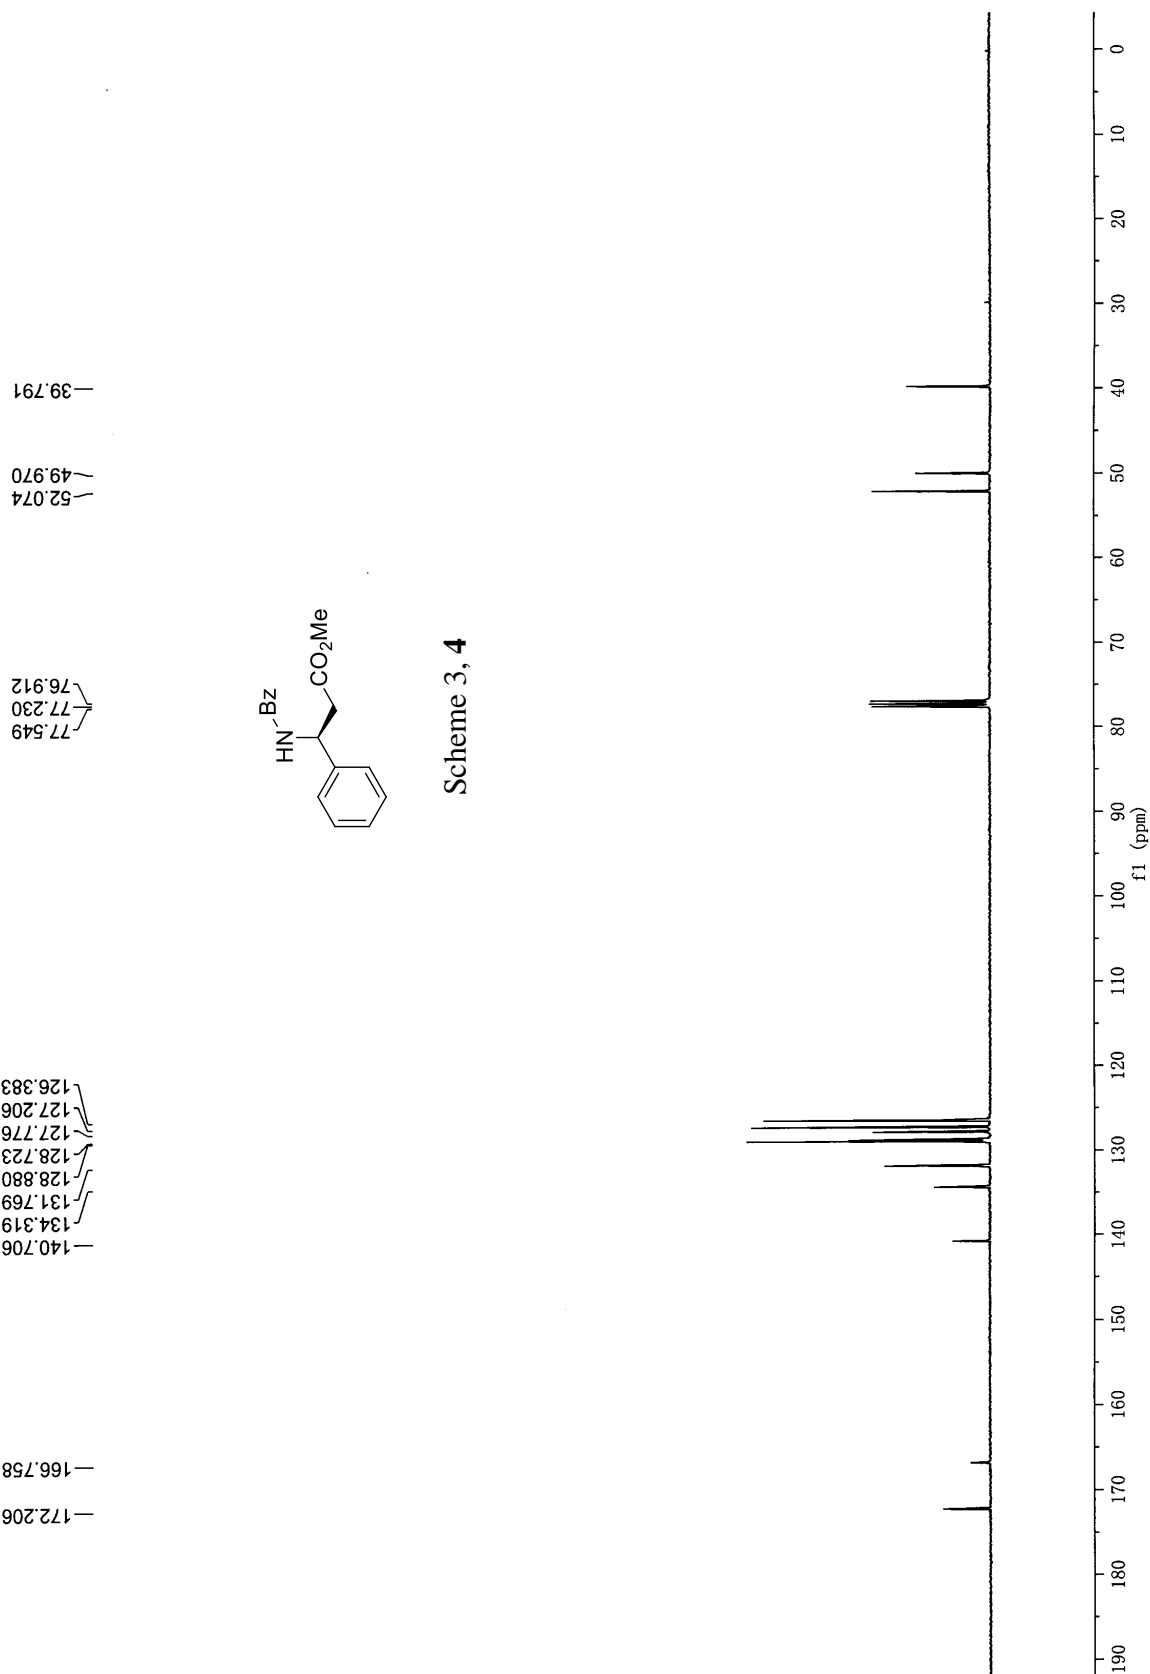

Supplement: d2nj01027e1.pdf [file d2nj01027e1.pdf]
